# Supplementary material for: Iron in a Cage: Fixation of a Fe(II)tpy2 Complex by Fourfold Interlinking
Source: PubMed Central journal article supplement (PMC7540000; doi:10.1002/anie.202006340), 2020-06-29
Supplement: ANIE-59-15947-s001.pdf [file ANIE-59-15947-s001.pdf]

## Supporting Information

### **Iron in a Cage: Fixation of a Fe(II)tpy<sub>2</sub> Complex by Fourfold Interlinking**

*Thomas Brandl, Sven Johannsen, Daniel Häussinger, Nithin Suryadevara, Alessandro Prescimone, Stefan Bernhard, Manuel Gruber, Mario Ruben, Richard Berndt, and Marcel Mayor\**

anie\_202006340\_sm\_miscellaneous\_information.pdf

## Table of Contents

|                                                                                                                                                                                                                                  |    |
|----------------------------------------------------------------------------------------------------------------------------------------------------------------------------------------------------------------------------------|----|
| Experimental Procedures .....                                                                                                                                                                                                    | 3  |
| <sup>1</sup> H-, <sup>13</sup> C-NMR (CDCl <sub>3</sub> , 400/101 MHz, 22 °C) and HR-ESI-MS spectra of compound <b>4</b> .....                                                                                                   | 14 |
| <sup>1</sup> H-, <sup>13</sup> C-NMR (CDCl <sub>3</sub> , 400/101 MHz, 22 °C) and HR-ESI-MS spectra of compound <b>5</b> .....                                                                                                   | 16 |
| <sup>1</sup> H-, <sup>13</sup> C-NMR (CD <sub>2</sub> Cl <sub>2</sub> , 400/101 MHz, 22 °C) and HR-ESI-MS spectra of compound <b>6</b> .....                                                                                     | 18 |
| <sup>1</sup> H-, <sup>13</sup> C-NMR (CD <sub>2</sub> Cl <sub>2</sub> , 400/101 MHz, 22 °C) and HR-ESI-MS spectra of compound <b>7</b> .....                                                                                     | 20 |
| <sup>1</sup> H-, <sup>13</sup> C-, COSY-, ROESY-, HSQC-, HMBC-NMR (Acetone-d <sub>6</sub> /Acetonitrile-d <sub>3</sub> , 600/400/151/101 MHz, 25 °C/22 °C) with full assignment and HR-ESI-MS spectra of compound <b>8</b> ..... | 22 |
| HR-ESI-MS spectra of compound <b>2</b> .....                                                                                                                                                                                     | 29 |
| <sup>1</sup> H-, <sup>13</sup> C-, COSY-, ROESY-, HSQC-, HMBC-NMR (Acetone-d <sub>6</sub> , 600/151 MHz, 25 °C) with full assignment and HR-ESI-MS spectra of compound <b>1</b> .....                                            | 30 |
| UV-Vis Spectra of Compound <b>8</b> and Compound <b>1</b> .....                                                                                                                                                                  | 37 |
| Crystal Data of <b>8</b> and Unsuccessful Crystallization Attempts of <b>1</b> .....                                                                                                                                             | 48 |
| SQUID Measurements.....                                                                                                                                                                                                          | 50 |
| IR-Spectra.....                                                                                                                                                                                                                  | 52 |
| Determination of the Spin-Spin Relaxation Times T <sub>2</sub> of Compound <b>8</b> and all- <i>trans</i> Isomer <b>1</b> by NMR Spectroscopy .....                                                                              | 54 |
| Monitoring the Imine Condensation towards the Fourfold Interlinked Complex <b>2</b> by DI-ESI-MS and NMR Spectroscopy.....                                                                                                       | 58 |
| Scanning Tunneling Microscope (STM) Experiments of Complex <b>1</b> .....                                                                                                                                                        | 60 |
| Fe(II)tpy <sub>2</sub> Model Complexes of Varying Rigidity in STM Experiments .....                                                                                                                                              | 60 |
| HPLC Chromatograms of Complex <b>1</b> .....                                                                                                                                                                                     | 62 |
| DFT Calculations .....                                                                                                                                                                                                           | 63 |

## Experimental Procedures

General Procedures: All chemicals were directly used for the synthesis without further purification, unless stated differently. Solvents for photophysical measurements were HPLC grade. Dry solvents were used as crown cap and purchased from *Acros Organics* and *Sigma-Aldrich*. NMR solvents were obtained from *Cambridge Isotope Laboratories, Inc.* (Andover, MA, USA). All NMR spectra were recorded on *Bruker Avance III HD* instruments operating at either 400.13 or 600.13 MHz proton frequency. The spectrometers were equipped with broadband direct detection probes (BBFO, 400 and 600 MHz) or a cryogenic quadruple indirect detection probe (QCI, 600 MHz), all with self-shielded z-gradients. Chemical shifts ( $\delta$ ) are reported in parts per million (ppm) relative to the residual solvent peak. Coupling constants ( $J$ ) are given in Hertz (Hz). The PFGSE (dosy) experiments were performed using a pulse sequence with bipolar gradients for diffusion and two spoil gradients (ledbpgp2s).<sup>1</sup> 16 Increments were recorded with linear increasing gradient strength from 5 to 95%, using 16 scans per increment and a recycling delay of 3s. Processing was performed with a two-parameter fit (I(0) and D) using the Bruker Topspin 3.5 software package.<sup>2</sup> The T2 relaxation times were determined with a Carr-Purcell-Meiboom-Gill (CPMG) sequence.<sup>3</sup> A recycling delay of 3 s and an echo time of 1 ms were applied for 8 increments with the following loop counters: 2,16,64,128,256,512,768,1024. Each increment was repeated 16 or 32 times and processed using the *Dynamics* modul of the Bruker Topspin 3.5 software package.<sup>4</sup>

Gas Chromatography (GC-MS) was performed on a *Shimadzu* GCMS-QP2010 SE gas chromatograph system, with a ZB-5HT inferno column (30 m x 0.25 mm x 0.25 mm), at 1 mL/min He-flow rate (split = 20:1) with a *Shimadzu* mass detector (EI 70 eV) was used. For high resolution mass spectra (HRMS) a HR-ESI-ToF-MS measurement on a *maXis™ 4G* instrument from *Bruker* was performed. MALDI-ToF mass spectra were performed on a *Bruker microflex™* mass spectrometer, calibrated with CsI<sub>3</sub>, and  $\alpha$ -cyano-4-hydroxycinnamic acid was used as matrix. Column chromatography was performed with SiliaFlash® P60 from *SILICYCLE* with a particle size of 40-63  $\mu$ m (230-400 mesh) and for TLC *Silica gel 60 F<sub>254</sub>* glass plates with a thickness of 0.25 mm from *Merck* were used. The detection was observed with a UV-lamp at 254 or 366 nm. For analytical HPLC a *Shimadzu* LC-20AD and a LC-20AT HPLC, respectively, was used equipped with a diodearray UV/Vis detector (SPD-M10A VP from *Shimadzu*,  $\lambda$  = 200-600 nm) and a column oven *Shimadzu* CTO-20AC. The used column for reverse phase was a *Reposil 100 C18*, 5  $\mu$ m, 250 x 16 mm; *Dr. Maisch GmbH*. For preparative HPLC a *Shimadzu* LC-20Ap and a LC-20Ap was used equipped with a diode array

---

<sup>1</sup> D. Wu et al., *J. Magn. Res. A*, **1995**, *115*, 260 – 264.

<sup>2</sup> Bruker BioSpin GmbH, Rheinstetten, (2017).

<sup>3</sup> S. Meiboom and D. Gill, *Rev. Scientific Instruments*, **1958**, *29*, 688-691.

<sup>4</sup> Bruker BioSpin GmbH, Rheinstetten, (2017).

UV/Vis detector (SPD-20A from Shimadzu,  $\lambda = 200-600$  nm). The used column was a Reprosil 100 C18, 10  $\mu\text{m}$ , 250 x 30 mm; Dr Maisch GmbH.

- **2,2'-(2-bromo-1,3-phenylene)bis(1,3-dioxolane) (4)**

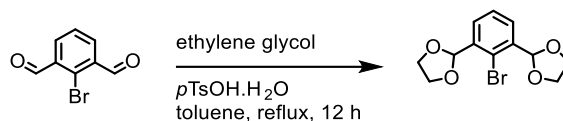

A 50 mL round-bottomed flask was charged with 2-bromoisophthalaldehyde (**3**, 500 mg, 2.35 mmol, 1.0 eq), *p*TsOH·H<sub>2</sub>O (9.03 mg, 47.0 μmol, 2 mol-%), ethyleneglycol (788 μL, 14.1 mmol, 6.0 eq.) and toluene (50 mL). The reaction mixture was heated to reflux for 12 hours and the formed water was removed using a Dean-Stark apparatus. The reaction mixture was cooled to room temperature, was washed with aqueous saturated NaHCO<sub>3</sub> solution and was extracted with DCM. The combined organic layers were washed with brine, dried over MgSO<sub>4</sub>, filtered and concentrated under reduced pressure to yield the product as a white solid (711 mg, 2.36 mmol, 100%). The product was sufficiently pure and was used for the next reaction without further purification.

#### Analytical Data for 4:

**<sup>1</sup>H NMR** (400 MHz, CDCl<sub>3</sub>, 22 °C) δ 7.62 (d, *J* = 7.5 Hz, 2H), 7.37 (t, *J* = 7.7 Hz, 1H), 6.19 (s, 2H), 4.20 – 4.01 (m, 8H).

**<sup>13</sup>C NMR** (101 MHz, CDCl<sub>3</sub>, 22 °C) δ 137.55, 128.67, 127.39, 123.78, 102.69, 65.54.

**GC-MS** (EI +, 70 eV): *m/z* (%) = 299 (26) [M+], 221 (16) [M+-Br], 186 (15), 184 (15), 89 (17), 73 (100).

**HRMS (ESI-ToF)**: calc. for [C<sub>12</sub>H<sub>14</sub>BrO<sub>4</sub>]<sup>+</sup> 301.0070; found 301.0075.

- **2-(2,6-di(1,3-dioxolan-2-yl)phenyl)-4,4,5,5-tetramethyl-1,3,2-dioxaborolane (5)**

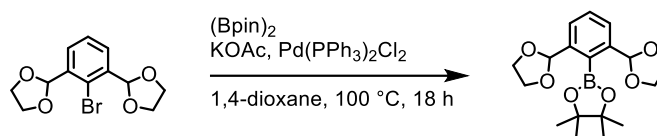

An oven-dried 100 mL Schlenk tube was charged with 2,2'-(2-bromo-1,3-phenylene)bis(1,3-dioxolane) (**4**, 666 mg, 2.21 mmol, 1.0 eq.) KOAc (438 mg, 4.42 mmol, 2.0 eq.), (Bpin)<sub>2</sub> (1.12 g, 4.42 mmol, 2.0 eq.) and 1,4-dioxane (30 mL). The reaction mixture was degassed with argon for 15 minutes, before Pd(PPh<sub>3</sub>)<sub>2</sub>Cl<sub>2</sub> (78.3 mg, 111 μmol, 5 mol-%) was added. The reaction mixture was degassed for further 15 minutes and then heated to 100 °C for 18 hours. After GC-MS indicated full consumption of the starting material, the reaction was cooled to room temperature, concentrated and purified by flash column chromatography (cyclohexane:ethyl acetate = 3:1) to obtain the product as white solid (667 mg, 1.92 mmol, 87%).

#### Analytical Data for **5**:

**<sup>1</sup>H NMR** (400 MHz, CDCl<sub>3</sub>, 22 °C) δ = 7.52 (d, *J* = 7.7 Hz, 2H), 7.40 – 7.31 (m, 1H), 6.16 (s, 2H), 4.05 – 3.93 (m, 8H), 1.40 (s, 12H).

**<sup>13</sup>C NMR** (101 MHz, CDCl<sub>3</sub>, 22 °C) δ = 142.62, 128.94, 125.39, 102.90, 83.95, 64.80, 25.37.

**GC-MS** (EI +, 70 eV): *m/z* (%) = 348 (10) [M<sup>+</sup>], 303 (33), 203 (100), 202 (30), 133 (40), 132 (25), 73 (45).

**HRMS (ESI-ToF)**: calc. for [C<sub>18</sub>H<sub>26</sub>BO<sub>6</sub>]<sup>+</sup> 349.1820; found 349.1819.

• **4,4''-bis(2,6-di(1,3-dioxolan-2-yl)phenyl)-2,2':6',2''-terpyridine (6)**

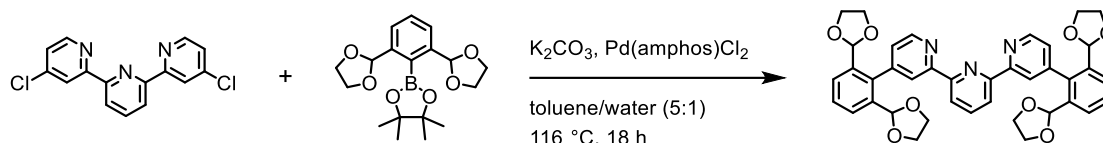

An oven-dried 25 mL round bottom flask was purged with argon and charged with 4,4''-dichloro-2,2':6',2''-terpyridine (50.0 mg, 165  $\mu$ mol, 1.0 eq.), 2-(2,6-di(1,3-dioxolan-2-yl)phenyl)-4,4,5,5-tetramethyl-1,3,2-dioxaborolane (**5**, 144 mg, 413  $\mu$ mol, 2.5 eq.),  $K_2CO_3$  (137 mg, 990  $\mu$ mol, 6.0 eq.) and bis(di-tert-butyl(4-dimethylaminophenyl)phosphine) dichloropalladium (II) (17.5 mg, 24.7  $\mu$ mol, 15 mol-%). The reactants were suspended in an extensively degassed solvent mixture of toluene/water (5:1 mL). The flask was sealed and heated to slight reflux at 116 °C oil bath temperature for 18 hours. The mixture was diluted with DCM and washed with water and brine, dried over  $MgSO_4$ , filtered and concentrated under reduced pressure. The crude material was purified by flash column chromatography (cyclohexane/acetone = 2:1 + 1%  $NH_4OH$ ) to obtain the product as a white solid (83.0 mg, 123  $\mu$ mol, 75%).

**Analytical Data for 6:**

**$^1H$  NMR** (400 MHz,  $CD_2Cl_2$ , 22 °C)  $\delta$  8.70 (dd,  $J = 4.9, 0.9$  Hz, 2H), 8.56 – 8.50 (m, 4H), 8.01 (t,  $J = 7.9$  Hz, 1H), 7.69 (d,  $J = 7.8$  Hz, 4H), 7.49 (t,  $J = 7.8$  Hz, 2H), 7.29 (dd,  $J = 4.9, 1.7$  Hz, 2H), 5.40 (s, 4H), 3.94 (dt,  $J = 7.1, 5.8$  Hz, 4H), 3.84 – 3.63 (m, 12H).

**$^{13}C$  NMR** (101 MHz,  $CD_2Cl_2$ , 22 °C)  $\delta$  156.23, 155.97, 148.80, 146.43, 139.32, 138.33, 136.37, 128.82, 127.89, 126.62, 123.23, 121.91, 101.50, 65.92, 65.72.

**HRMS (ESI-ToF):** calc. for  $[C_{39}H_{36}N_3O_8]^+$  674.2497; found 674.2507.

- 2,2'-([2,2':6',2''-terpyridine]-4,4''-diyl)diisophthalaldehyde (**7**)

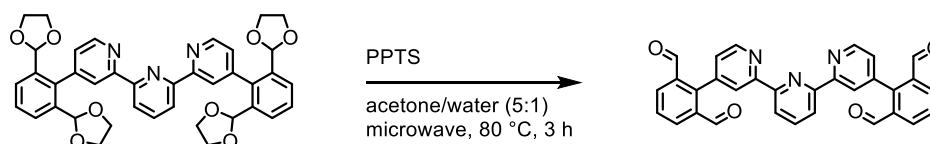

A 20 ml microwave vial was charged with 4,4''-bis(2,6-di(1,3-dioxolan-2-yl)phenyl)-2,2':6',2''-terpyridine (**6**, 80.0 mg, 119  $\mu$ mol, 1.0 eq.), absolute acetone (12.75 ml) and pyridinium *p*-toluenesulfonate (133 mg, 524  $\mu$ mol, 4.4 eq). Then, 2.25 ml water was added and the vial was sealed. The reaction mixture was heated to 80 °C for three hours in a microwave. The solvent was removed under reduced pressure and the remaining substance was diluted with DCM and the combined organic layers were washed with NaHCO<sub>3</sub>, water and brine, dried over MgSO<sub>4</sub>, filtered and concentrated under reduced pressure to obtain the product as white solid (50.0 mg, 101  $\mu$ mol, 85%).

#### Analytical Data for **7**:

**<sup>1</sup>H NMR** (400 MHz, CDCl<sub>3</sub>, 22 °C)  $\delta$  9.78 (d, *J* = 0.8 Hz, 4H), 8.83 (dd, *J* = 4.9, 0.9 Hz, 2H), 8.65 (d, *J* = 7.9 Hz, 2H), 8.54 (dd, *J* = 1.7, 0.9 Hz, 2H), 8.22 (d, *J* = 7.7 Hz, 4H), 8.07 (t, *J* = 7.9 Hz, 1H), 7.71 (tt, *J* = 7.7, 0.8 Hz, 2H), 7.35 (dd, *J* = 4.9, 1.7 Hz, 2H).

**<sup>13</sup>C NMR** (101 MHz, CD<sub>2</sub>Cl<sub>2</sub>, 22 °C)  $\delta$  190.40, 156.41, 155.41, 149.71, 145.42, 143.15, 138.73, 134.82, 133.47, 129.80, 126.01, 122.78, 122.70.

**HRMS (ESI-ToF)**: calc. for [C<sub>31</sub>H<sub>20</sub>N<sub>3</sub>O<sub>4</sub>]<sup>+</sup> 498.1448; found 498.1442.



- **2,2'-([2,2':6',2''-terpyridine]-4,4''-diyl)diisophthalaldehyde iron hexafluorophosphate (8)**

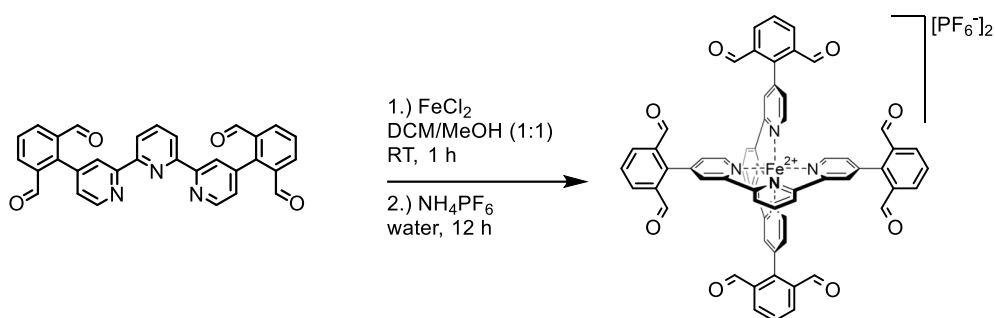

A 100 mL round-bottomed flask was charged with 2,2'-([2,2':6',2''-terpyridine]-4,4''-diyl)diisophthalaldehyde (**7**, 27.3 mg, 54.9  $\mu\text{mol}$ , 2.0 eq.), and a solvent mixture of DCM/MeOH (50 mL, 1:1). Then, FeCl<sub>2</sub> (3.48 mg, 27.5  $\mu\text{mol}$ , 1.0 eq.) was added. The reaction mixture was stirred for one hour at room temperature. The reaction mixture was concentrated to a minimum, before NH<sub>4</sub>PF<sub>6</sub> salt (224 mg, 1.37 mmol, 50.0 eq.) dissolved in water (50 mL) was added in order to exchange the counter ion from Cl<sup>-</sup> to PF<sub>6</sub><sup>-</sup> and thus make the homoleptic [Fe(tpy)<sub>2</sub>]<sup>2+</sup>[(PF<sub>6</sub>)<sub>2</sub>]<sup>-</sup> complex soluble in organic solvents. The formed precipitate was filtered and was washed with excess water. The purple solid was eluted with DCM, dried over MgSO<sub>4</sub>, filtered and concentrated under reduced pressure. The pure product was obtained as purple solid (34.5 mg, 26.0  $\mu\text{mol}$ , 94%).

#### Analytical Data for 8:

**<sup>1</sup>H NMR** (400 MHz, Acetone-*d*<sub>6</sub>, 22 °C)  $\delta$  9.72 (s, 8H), 9.33 (d,  $J$  = 8.1 Hz, 4H), 9.08 (dd,  $J$  = 1.9, 0.7 Hz, 4H), 8.90 (t,  $J$  = 8.1 Hz, 2H), 8.32 (d,  $J$  = 7.7 Hz, 8H), 7.97 (t,  $J$  = 7.7 Hz, 4H), 7.77 (dd,  $J$  = 5.8, 0.7 Hz, 4H), 7.52 (dd,  $J$  = 5.7, 1.9 Hz, 4H).

(600 MHz, Acetonitrile-*d*<sub>3</sub>, 25 °C)  $\delta$  9.66 (d,  $J$  = 0.6 Hz, 8H), 8.85 (d,  $J$  = 8.1 Hz, 4H), 8.66 (t,  $J$  = 8.1 Hz, 2H), 8.62 (dd,  $J$  = 1.9, 0.7 Hz, 4H), 8.26 (d,  $J$  = 7.7 Hz, 8H), 7.87 (t,  $J$  = 7.7 Hz, 4H), 7.32 (dd,  $J$  = 5.8, 0.7 Hz, 4H), 7.26 (dd,  $J$  = 5.8, 1.8 Hz, 4H).

**<sup>13</sup>C NMR** (101 MHz, Acetone-*d*<sub>6</sub>, 22 °C) δ 190.71, 161.59, 158.89, 153.74, 147.42, 141.61, 139.42, 135.33, 135.28, 131.29, 129.65, 126.43, 125.41.

(151 MHz, Acetonitrile-*d*<sub>3</sub>, 25 °C) δ 191.68, 161.69, 158.91, 154.23, 147.48, 142.23, 139.77, 135.77, 135.60, 131.83, 129.92, 126.67, 125.59.

**HRMS (ESI-ToF):** calc. for [C<sub>62</sub>H<sub>38</sub>FeN<sub>6</sub>O<sub>8</sub>]<sup>2+</sup> 525.1046; found 525.1052.

- **Imine iron terpyridine cage complex (2)**

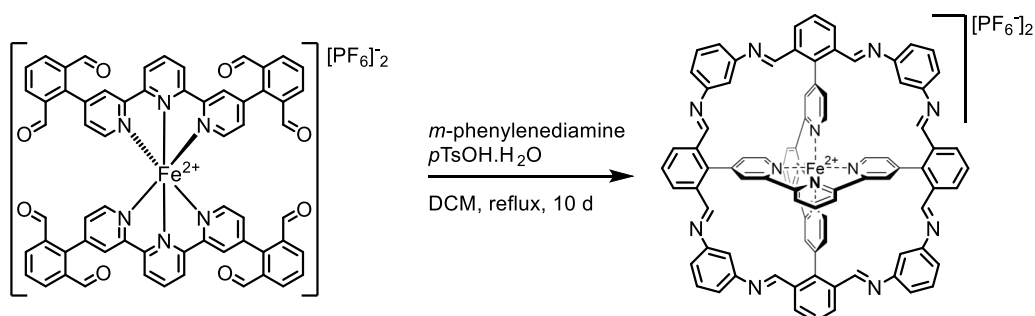

A 100 mL three-necked round bottom flask was charged with the iron complex (**8**, 10.3 mg, 7.68  $\mu\text{mol}$ , 1.0 eq.), freshly distilled DCM (50 mL) and *p*-toluenesulfonic acid monohydrate (one crystal). The reaction mixture was heated to reflux *m*-phenylenediamine (3.44 mg, 31.5  $\mu\text{mol}$ , 4.1 eq.) dissolved in previously distilled DCM (10 mL) was added with a syringe pump over 10 hours. The reaction progress was controlled by ESI-MS analysis. ESI-MS clearly indicated the formation of, onefold linked, twofold linked, threefold linked and fourfold linked iron terpyridine cage complex. As the reaction was not completed after 118 hours, additional *m*-phenylenediamine (3.58 mg, 32.3  $\mu\text{mol}$ , 4.3 eq.) was added. Furthermore the solvent was exchanged by 1,2-dichloroethane to allow higher temperature. The reaction was heated to reflux and after another 123 hours, ESI-MS indicated complete formation of the product. Purification attempts by column chromatography ( $\text{SiO}_2$ ), reversed-phase HPLC or crystallization led to the re-opening of the reversible imine bonds.

**Analytical Data for 2:**

**HRMS (ESI-ToF):** calc. for  $[\text{C}_{86}\text{H}_{54}\text{FeN}_{14}]^{2+}$  669.2005; found 669.1999.

- **Wittig iron terpyridine cage complex (1)**

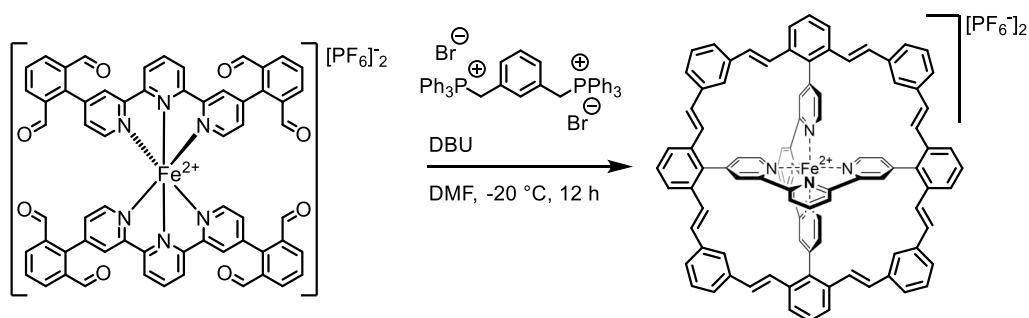

A 100 mL two-necked round bottomed flask was charged with the iron aldehyde complex (**8**, 100 mg, 74.6  $\mu\text{mol}$ , 1.0 eq.), dry DMF (50 mL) and DBU (445  $\mu\text{L}$ , 2.98 mmol, 40 eq.). The reaction mixture was cooled to  $-20\text{ }^{\circ}\text{C}$  before the diphosphonium salts (588 mg, 746  $\mu\text{mol}$ , 10 eq.) dissolved in dry DMF (5 mL) was added dropwise. MALDI-MS indicated complete conversion to the product. The reaction was stopped and concentrated to dryness under reduced pressure. The solid was redissolved in ethanol, filtered and subjected to preparative HPLC. With a solvent mixture EtOH/MeOH/H<sub>2</sub>O/TEA/TFA (44.64:44.64:9.99:0.45:0.28) the product was separated from overreacted and only threefold interlinked side-product. As the Wittig reaction is not selective and it was assumed that the complex can have several conformers a second HPLC run using a solvent mixture of MeCN with 0.1% TFA / H<sub>2</sub>O with 10 mM NH<sub>4</sub>PF<sub>6</sub> (7:3) was performed. Using these conditions it was possible to isolate a small fraction of the complex (4.50 mg, 3.00  $\mu\text{mol}$ , 4%) that could be identify as the all-trans isomer as a purple solid.

### Analytical Data for **1**:

**<sup>1</sup>H NMR** (600 MHz, Acetone-*d*<sub>6</sub>, 25  $^{\circ}\text{C}$ )  $\delta$  9.30 (d,  $J$  = 8.1 Hz, 4H), 8.76 (dd,  $J$  = 1.8, 0.7 Hz, 4H), 8.70 (t,  $J$  = 8.1 Hz, 2H), 7.78 – 7.71 (m, 12H), 7.54 (t,  $J$  = 7.8 Hz, 4H), 7.38 – 7.32 (m, 12H), 7.28 (dd,  $J$  = 5.7, 1.8 Hz, 4H), 7.20 (d,  $J$  = 1.7 Hz, 4H), 6.86 (d,  $J$  = 16.4 Hz, 8H), 6.71 (d,  $J$  = 16.4 Hz, 8H).

(600 MHz, Acetonitrile-*d*<sub>3</sub>, 25  $^{\circ}\text{C}$ )  $\delta$  8.78 (d,  $J$  = 8.1 Hz, 4H), 8.51 (t,  $J$  = 8.1 Hz, 2H), 8.44 (dd,  $J$  = 1.8, 0.7 Hz, 4H), 7.69 (d,  $J$  = 7.9 Hz, 8H), 7.51 (t,  $J$  = 7.9 Hz, 4H), 7.37 – 7.31 (m, 4H), 7.30 – 7.26 (m, 8H), 7.14 (dd,  $J$

= 5.8, 1.8 Hz, 4H), 7.10 (s, 4H), 6.79 (d,  $J = 16.3$  Hz, 8H), 6.69 (d,  $J = 16.4$  Hz, 8H).

**$^{13}\text{C}$  NMR** (151 MHz, Acetone- $d_6$ , 25 °C)  $\delta$  161.34, 159.22, 153.24, 151.17, 138.91, 138.20, 137.73, 135.21, 133.63, 131.37, 130.47, 130.18, 129.93, 127.06, 126.89, 126.85, 125.10, 120.82.

**HRMS (ESI-ToF):** calc. for  $[\text{C}_{94}\text{H}_{62}\text{FeN}_6]^{2+}$  665.2188; found 665.2189.

# <sup>1</sup>H-, <sup>13</sup>C-NMR (CDCl<sub>3</sub>, 400/101 MHz, 22 °C) and HR-ESI-MS spectra of compound 4

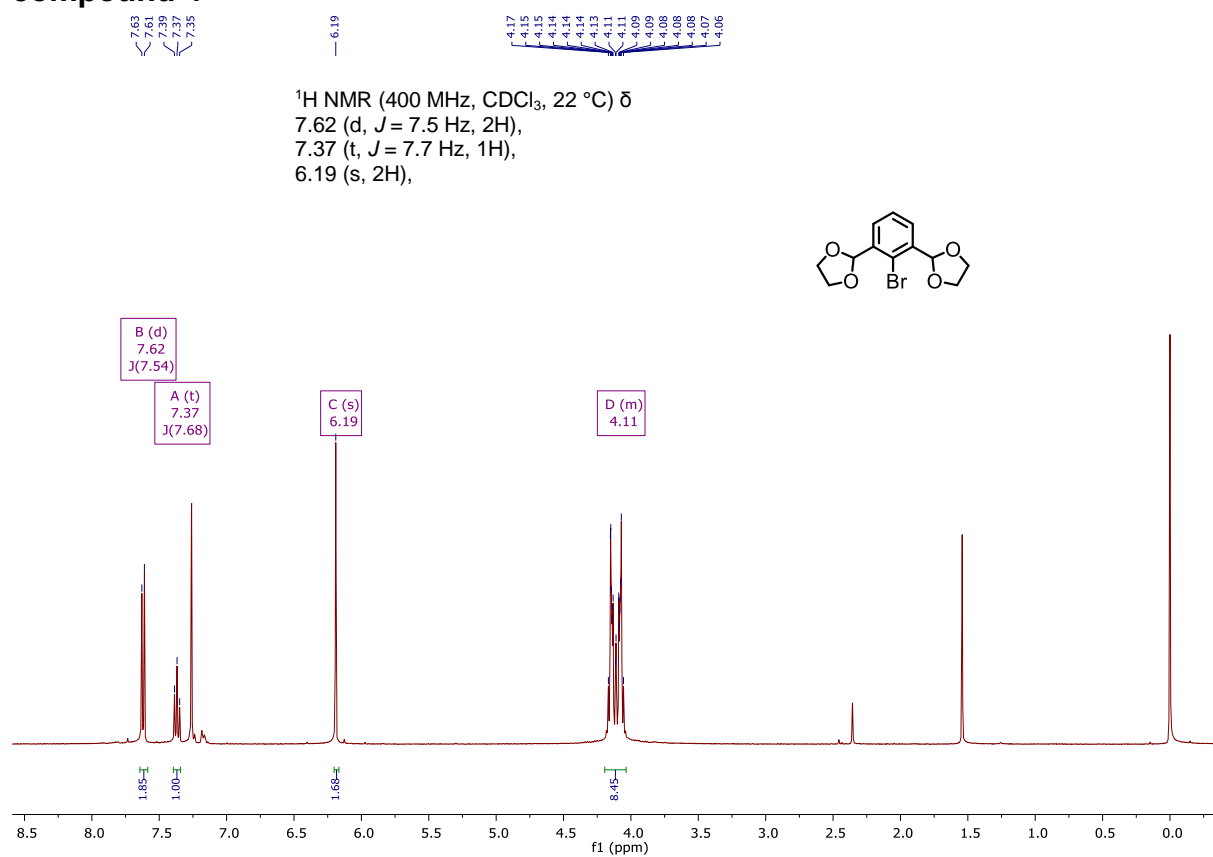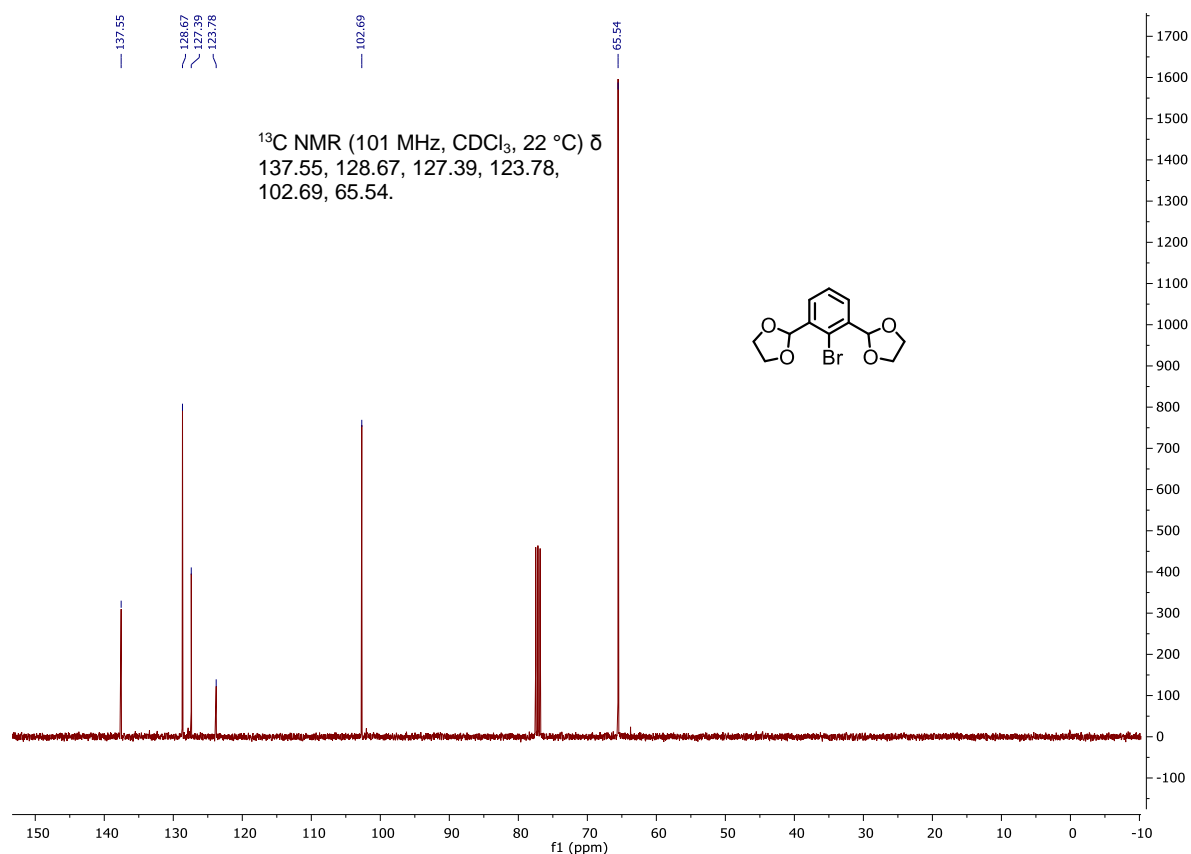

# Mass Spectrum SmartFormula Report

**Analysis Info**

Analysis Name D:\Data\acquisition data hn\BRT362.d  
 Method 22 Direct\_pos\_mid.m  
 Sample Name Thomas Brandl / BRT362  
 Comment 10 mg/mL in DCM, analyzed in MeOH

Acquisition Date 12.03.2019 09:08:45  
 Operator Miff  
 Instrument / Ser# maXis 4G 21243

**Acquisition Parameter**

|             |            |                      |          |                            |           |
|-------------|------------|----------------------|----------|----------------------------|-----------|
| Source Type | ESI        | Ion Polarity         | Positive | Set Nebulizer              | 0.4 Bar   |
| Focus       | Not active | Set Capillary        | 3600 V   | Set Dry Heater             | 180 °C    |
| Scan Begin  | 75 m/z     | Set End Plate Offset | -500 V   | Set Dry Gas                | 4.0 l/min |
| Scan End    | 1700 m/z   | Collision Energy     | 8.0 eV   | Set Ion Energy ( MS only ) | 4.0 eV    |

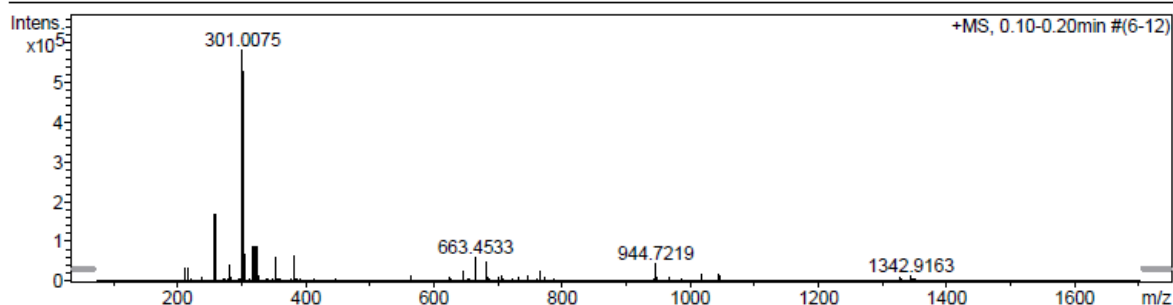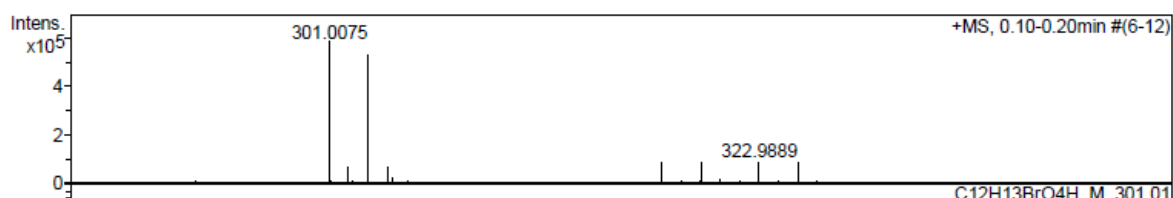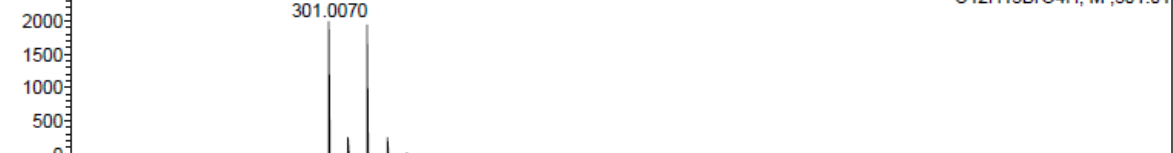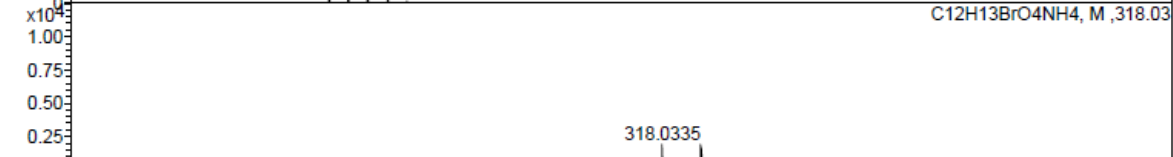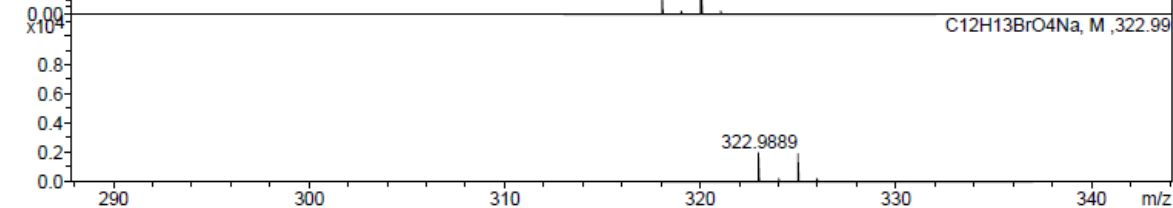

| Meas. m/z | # | Formula             | Score  | m/z      | err [mDa] | err [ppm] | mSigma | rdb | e <sup>-</sup> Conf | z  |
|-----------|---|---------------------|--------|----------|-----------|-----------|--------|-----|---------------------|----|
| 301.0075  | 1 | C 12 H 14 Br O 4    | 100.00 | 301.0070 | -0.5      | -1.7      | 37.1   | 5.5 | even                | 1+ |
| 318.0335  | 1 | C 12 H 17 Br N O 4  | 100.00 | 318.0335 | -0.0      | -0.0      | 5.3    | 4.5 | even                |    |
| 322.9889  | 1 | C 12 H 13 Br Na O 4 | 100.00 | 322.9889 | -0.0      | -0.0      | 12.9   | 5.5 | even                |    |

# <sup>1</sup>H-, <sup>13</sup>C-NMR (CDCl<sub>3</sub>, 400/101 MHz, 22 °C) and HR-ESI-MS spectra of compound 5

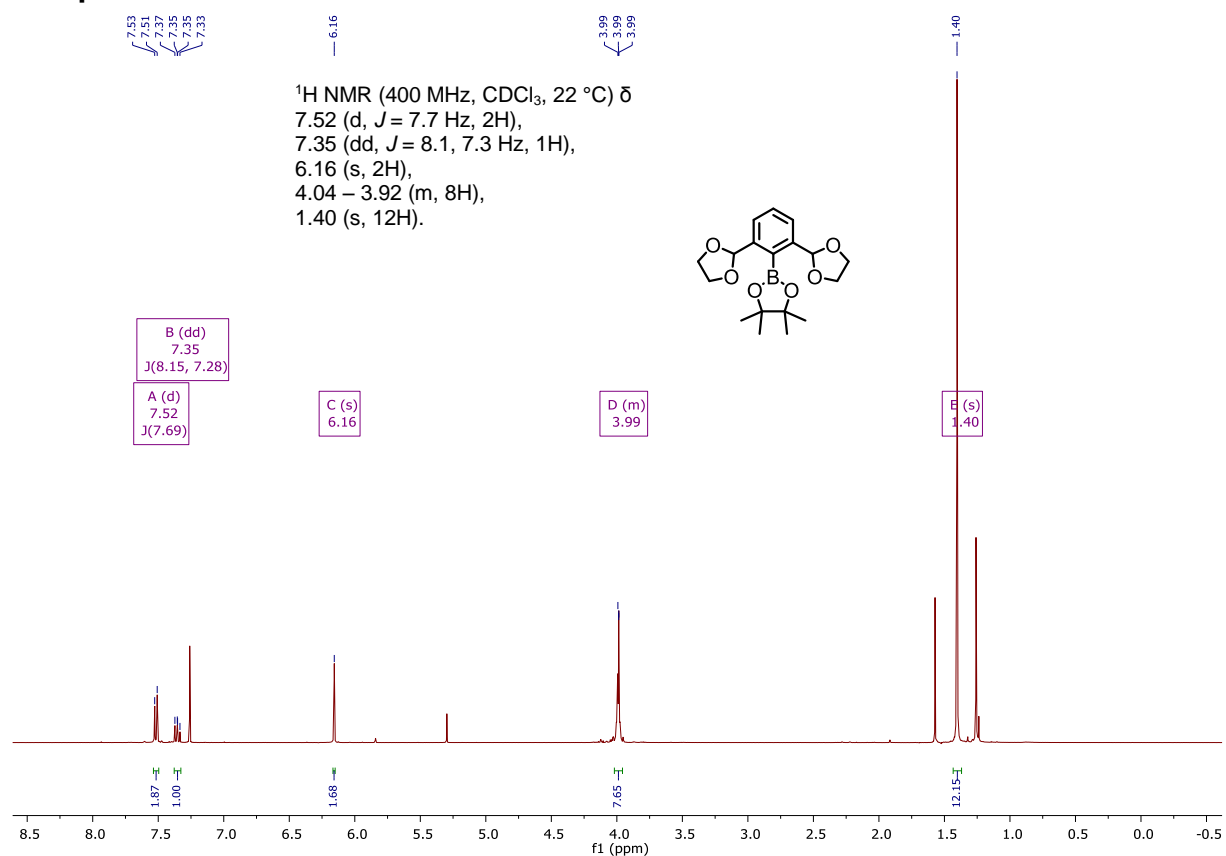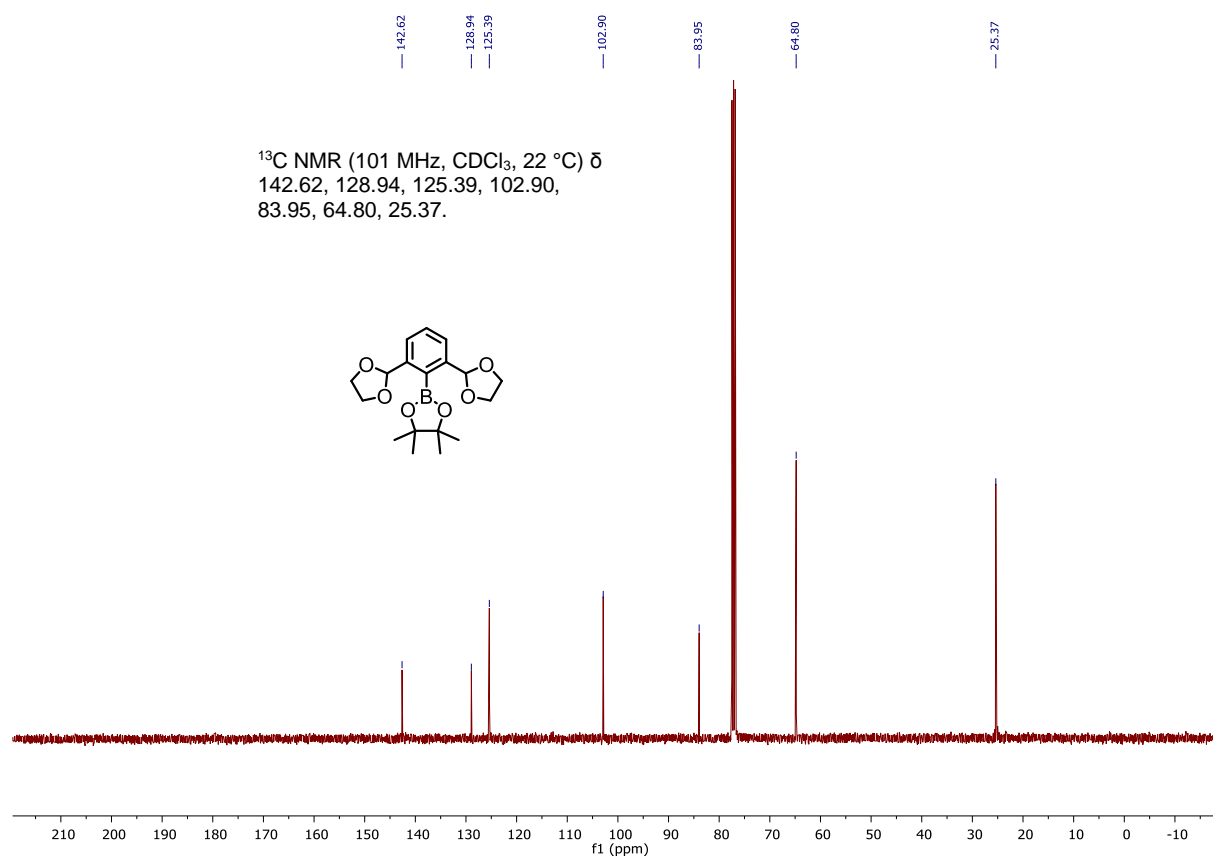



# Mass Spectrum SmartFormula Report

**Analysis Info**

|               |                                                     |                   |                     |
|---------------|-----------------------------------------------------|-------------------|---------------------|
| Analysis Name | N:\new acq data\BRT099 001.d                        | Acquisition Date  | 04.11.2015 15:31:23 |
| Method        | hn Direct_Infusion_pos mode_75-1700 mid 4eV.m       | Operator          | hn                  |
| Sample Name   | Thomas Brandl                                       | Instrument / Ser# | maXis 4G 21243      |
| Comment       | BRT099, ca. 10 ug/ml MeCN, 1:10 verdünnt, mit HCOOH |                   |                     |

**Acquisition Parameter**

|             |            |                       |           |                            |           |
|-------------|------------|-----------------------|-----------|----------------------------|-----------|
| Source Type | ESI        | Ion Polarity          | Positive  | Set Nebulizer              | 0.4 Bar   |
| Focus       | Not active | Set Capillary         | 3600 V    | Set Dry Heater             | 180 °C    |
| Scan Begin  | 75 m/z     | Set End Plate Offset  | -500 V    | Set Dry Gas                | 4.0 l/min |
| Scan End    | 1700 m/z   | Set Collision Cell RF | 350.0 Vpp | Set Ion Energy ( MS only ) | 4.0 eV    |

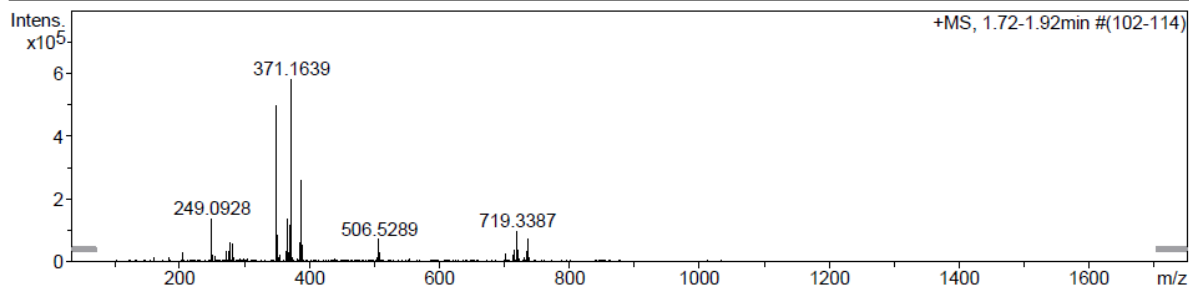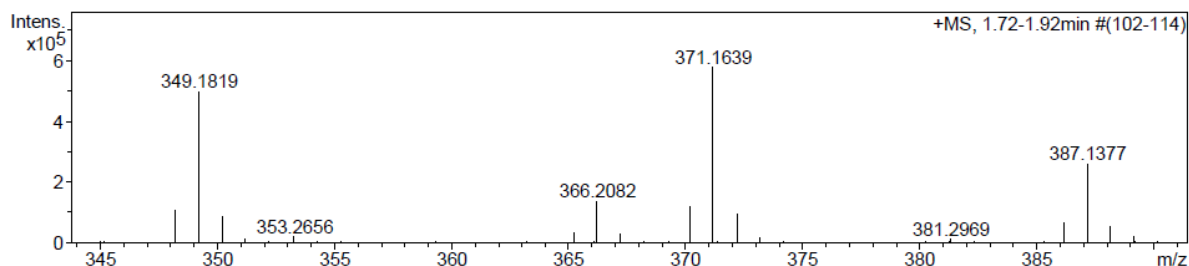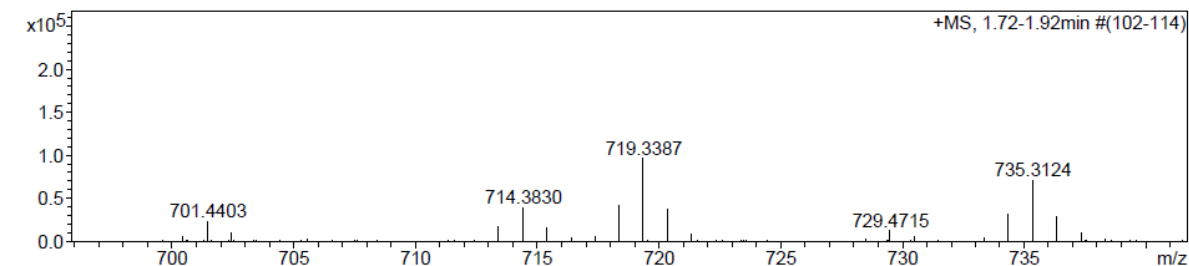

| Meas. m/z | # | Formula               | Score  | m/z      | err [mDa] | err [ppm] | mSigma | rdb  | e <sup>-</sup> Conf | N-Rule | z  |
|-----------|---|-----------------------|--------|----------|-----------|-----------|--------|------|---------------------|--------|----|
| 349.1819  | 1 | C 18 H 26 B O 6       | 100.00 | 349.1820 | 0.1       | 0.2       | 17.2   | 6.5  | even                | ok     | 1+ |
| 366.2082  | 1 | C 18 H 29 B N O 6     | 100.00 | 366.2086 | 0.0       | 0.0       | 0.7    | 5.5  | even                | ok     |    |
| 371.1639  | 1 | C 18 H 25 B Na O 6    | 100.00 | 371.1640 | 0.1       | 0.1       | 24.8   | 6.5  | even                | ok     |    |
| 387.1377  | 1 | C 18 H 25 B K O 6     | 100.00 | 387.1379 | -0.1      | -0.3      | 12.4   | 6.5  | even                | ok     |    |
| 714.3830  | 1 | C 36 H 54 B 2 N O 12  | 100.00 | 714.3838 | -0.4      | -0.5      | 8.6    | 11.5 | even                | ok     |    |
| 719.3387  | 1 | C 36 H 50 B 2 Na O 12 | 100.00 | 719.3392 | 0.5       | 0.8       | 5.1    | 12.5 | even                | ok     |    |
| 735.3124  | 1 | C 36 H 50 B 2 K O 12  | 100.00 | 735.3132 | -0.4      | -0.6      | 8.5    | 12.5 | even                | ok     |    |

**<sup>1</sup>H-, <sup>13</sup>C-NMR (CD<sub>2</sub>Cl<sub>2</sub>, 400/101 MHz, 22 °C) and HR-ESI-MS spectra of compound 6**

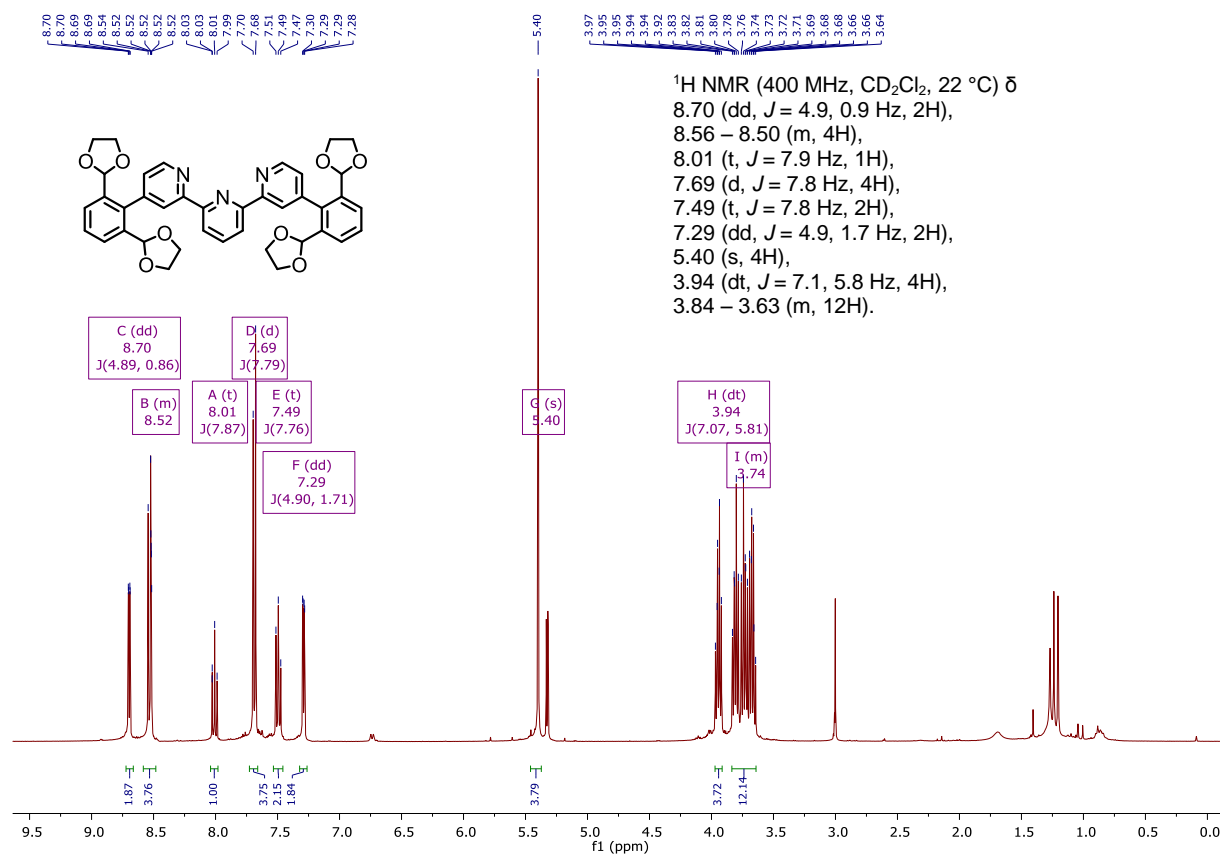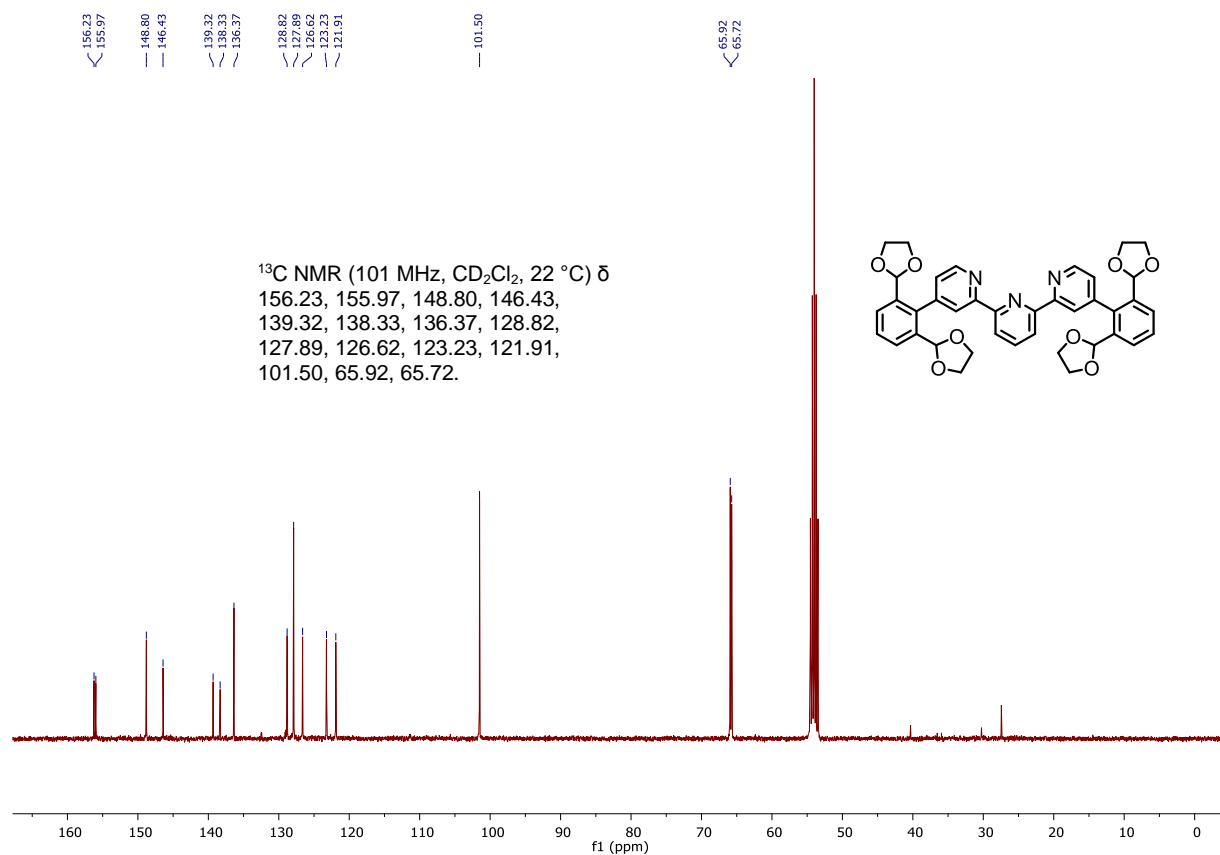

# Mass Spectrum SmartFormula Report

**Analysis Info**

Analysis Name N:\new acq data\BRT078 001.d  
 Method hn Direct\_Infusion\_pos mode\_75-1700 mid 4eV.m  
 Sample Name Thomas Brandl, BRT078  
 Comment BRT078, ca. 50 ug/ml MeCN, 1:10 verdünnt

Acquisition Date 08.05.2015 17:03:23

Operator hn  
 Instrument / Ser# maXis 4G 21243

**Acquisition Parameter**

|             |            |                       |           |                            |           |
|-------------|------------|-----------------------|-----------|----------------------------|-----------|
| Source Type | ESI        | Ion Polarity          | Positive  | Set Nebulizer              | 0.4 Bar   |
| Focus       | Not active | Set Capillary         | 3600 V    | Set Dry Heater             | 180 °C    |
| Scan Begin  | 75 m/z     | Set End Plate Offset  | -500 V    | Set Dry Gas                | 4.0 l/min |
| Scan End    | 1700 m/z   | Set Collision Cell RF | 500.0 Vpp | Set Ion Energy ( MS only ) | 4.0 eV    |

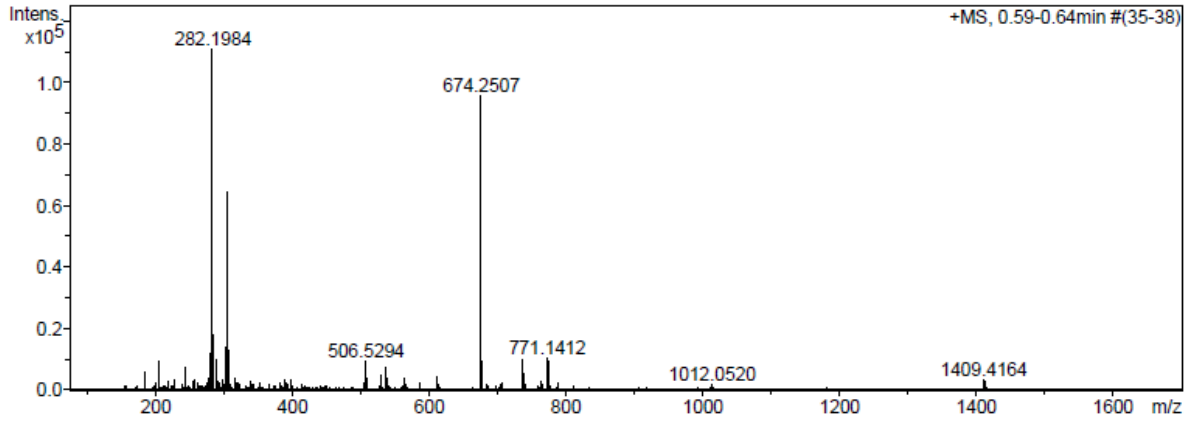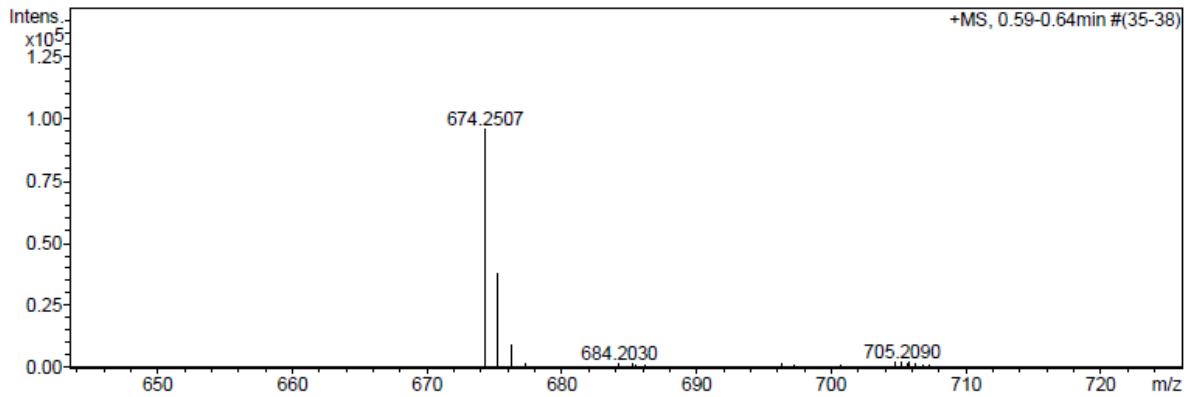

| Meas. m/z | # | Formula           | Score  | m/z      | err [mDa] | err [ppm] | mSigma | rdb  | e <sup>-</sup> Conf | N-Rule | z  |
|-----------|---|-------------------|--------|----------|-----------|-----------|--------|------|---------------------|--------|----|
| 674.2507  | 1 | C 39 H 36 N 3 O 8 | 100.00 | 674.2497 | -1.0      | -1.5      | 23.4   | 23.5 | even                | ok     | 1+ |

**<sup>1</sup>H-, <sup>13</sup>C-NMR (CD<sub>2</sub>Cl<sub>2</sub>, 400/101 MHz, 22 °C) and HR-ESI-MS spectra of compound 7**

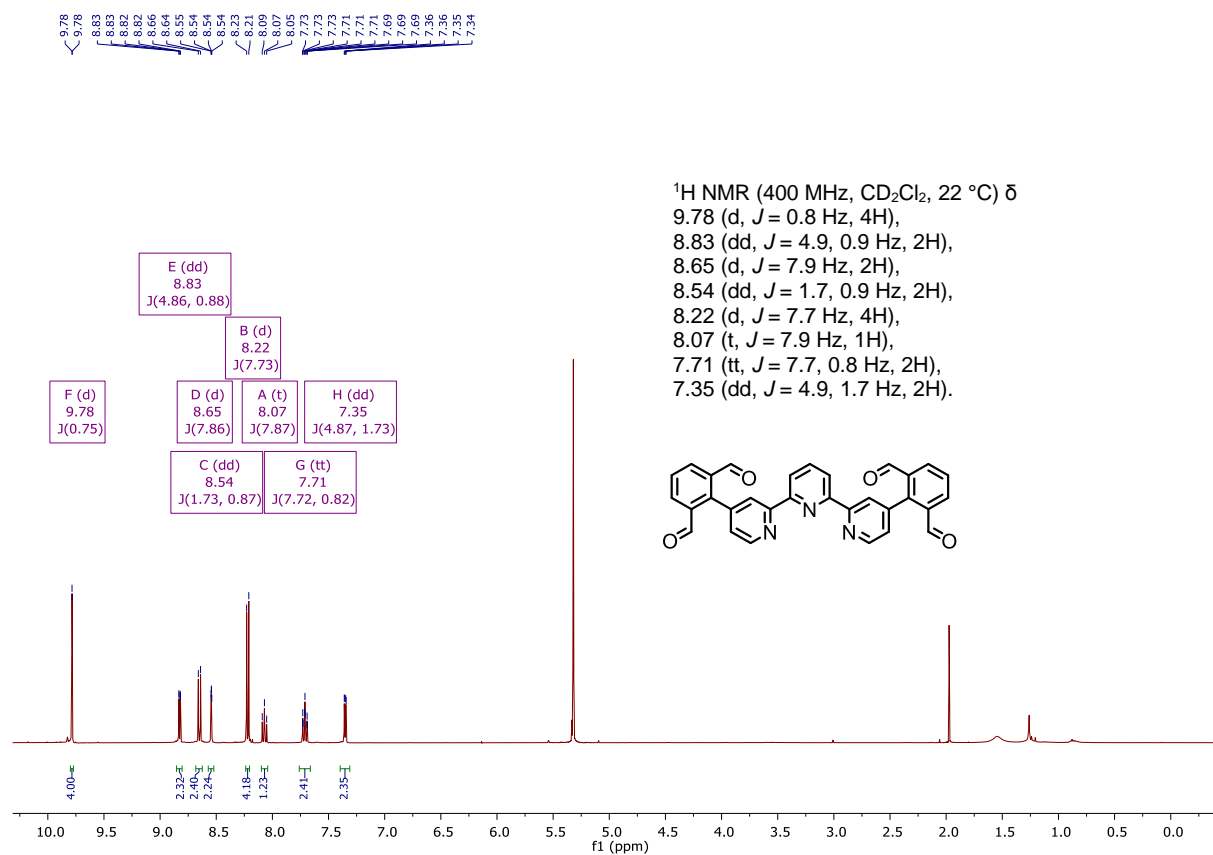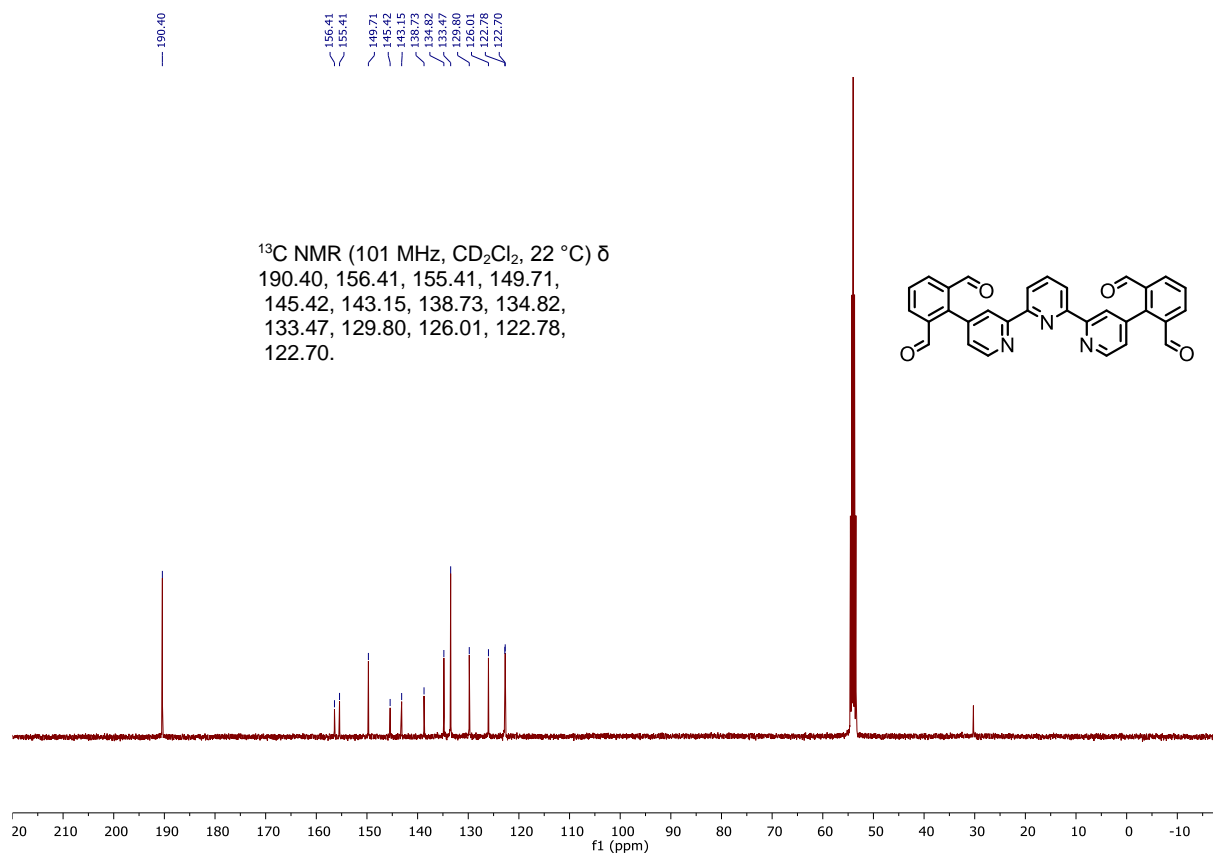

# Mass Spectrum SmartFormula Report

**Analysis Info**

|               |                                                          |                   |                     |
|---------------|----------------------------------------------------------|-------------------|---------------------|
| Analysis Name | N:\new acq data\BRT080 002.d                             | Acquisition Date  | 12.05.2015 15:56:51 |
| Method        | hn Direct_Infusion_pos mode_75-1700 mid 4eV.m            | Operator          | hn                  |
| Sample Name   | Thomas Brandl, BRT080                                    | Instrument / Ser# | maXis 4G 21243      |
| Comment       | BRT080, ca. 10 ug/ml MeCN, via Spritze hinter MeOH/HCOOH |                   |                     |

**Acquisition Parameter**

|             |            |                       |           |                            |           |
|-------------|------------|-----------------------|-----------|----------------------------|-----------|
| Source Type | ESI        | Ion Polarity          | Positive  | Set Nebulizer              | 0.4 Bar   |
| Focus       | Not active | Set Capillary         | 3600 V    | Set Dry Heater             | 180 °C    |
| Scan Begin  | 75 m/z     | Set End Plate Offset  | -500 V    | Set Dry Gas                | 4.0 l/min |
| Scan End    | 1700 m/z   | Set Collision Cell RF | 500.0 Vpp | Set Ion Energy ( MS only ) | 4.0 eV    |

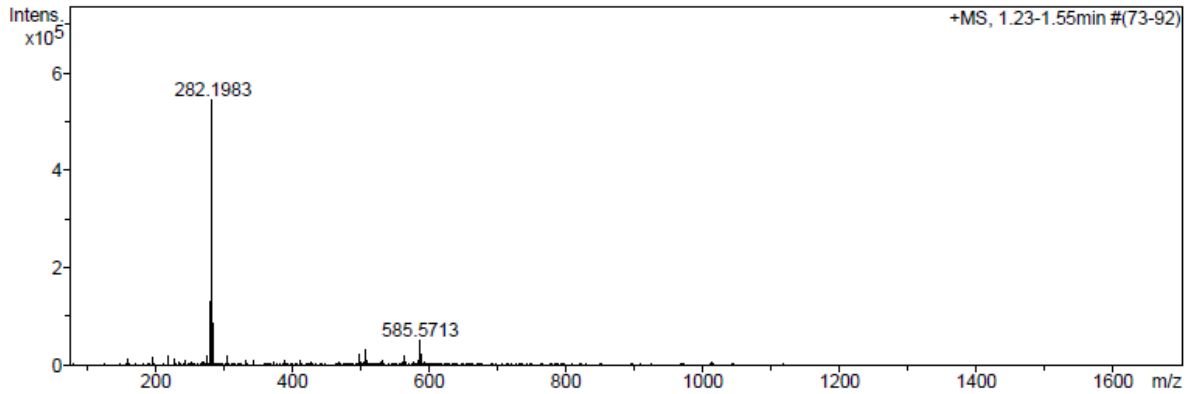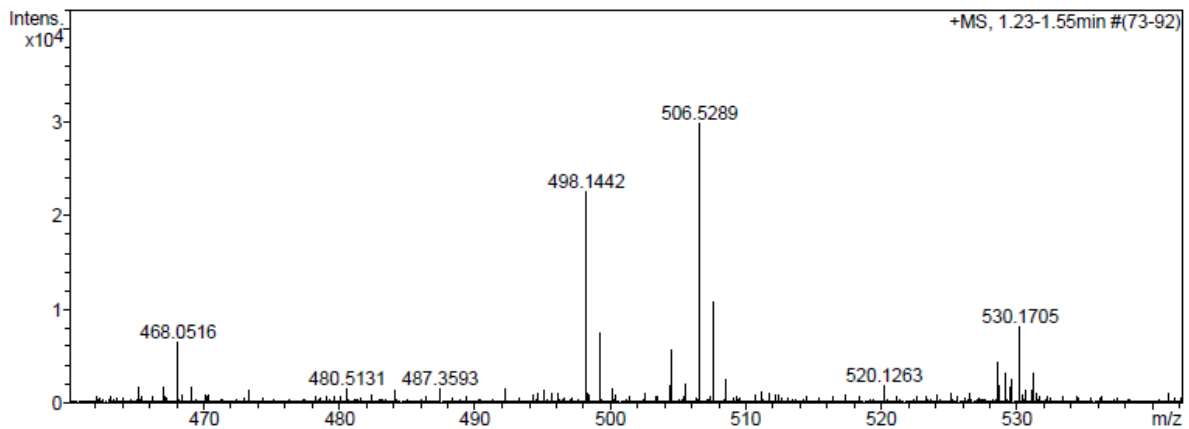

| Meas. m/z | # | Formula              | Score  | m/z      | err [mDa] | err [ppm] | mSigma | rdb  | e <sup>-</sup> Conf | N-Rule | z  |
|-----------|---|----------------------|--------|----------|-----------|-----------|--------|------|---------------------|--------|----|
| 498.1442  | 1 | C 31 H 20 N 3 O 4    | 100.00 | 498.1448 | 0.6       | 1.2       | 6.7    | 23.5 | even                | ok     | 1+ |
| 520.1263  | 1 | C 31 H 19 N 3 Na O 4 | 100.00 | 520.1268 | 0.4       | 0.8       | 32.1   | 23.5 | even                | ok     |    |

**<sup>1</sup>H-, <sup>13</sup>C-, COSY-, ROESY-, HSQC-, HMBC-NMR (Acetone-d<sub>6</sub>/Acetonitrile-d<sub>3</sub>, 600/400/151/101 MHz, 25 °C/22 °C) with full assignment and HR-ESI-MS spectra of compound 8**

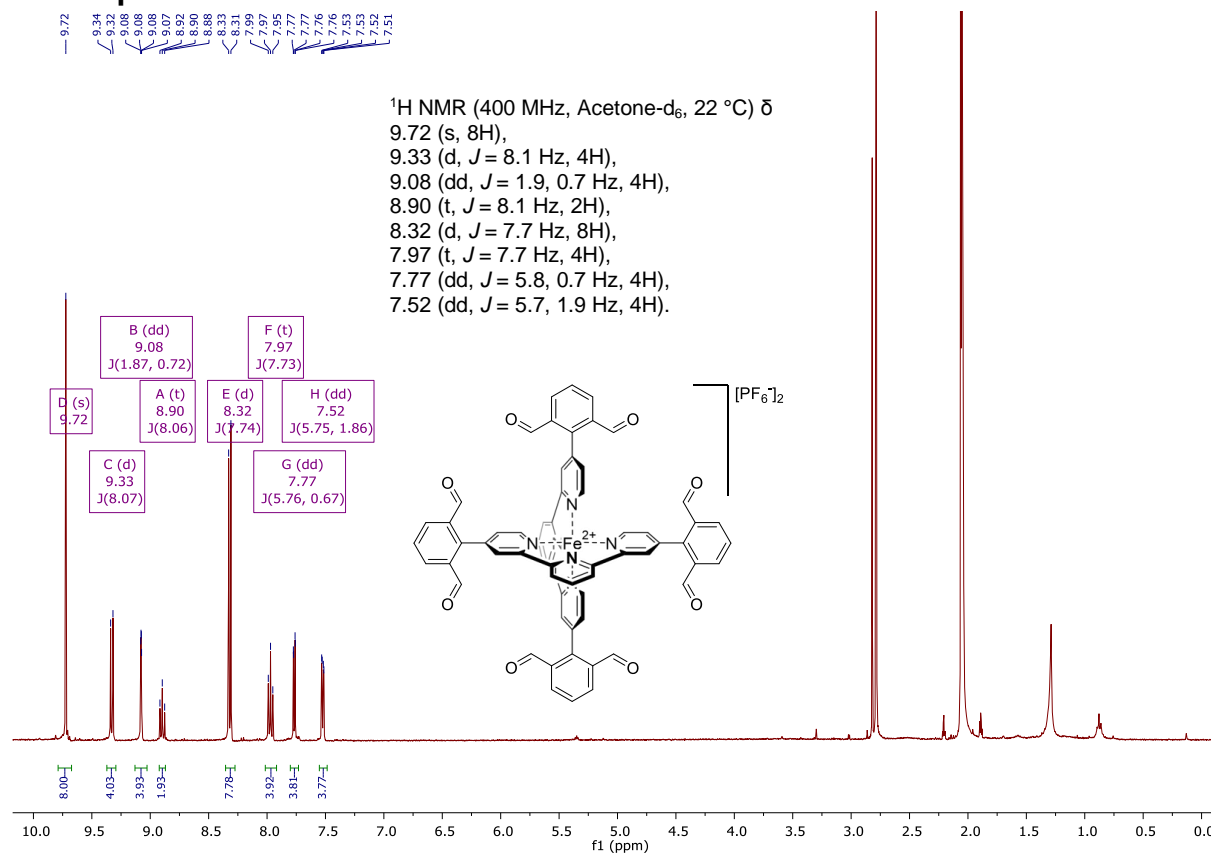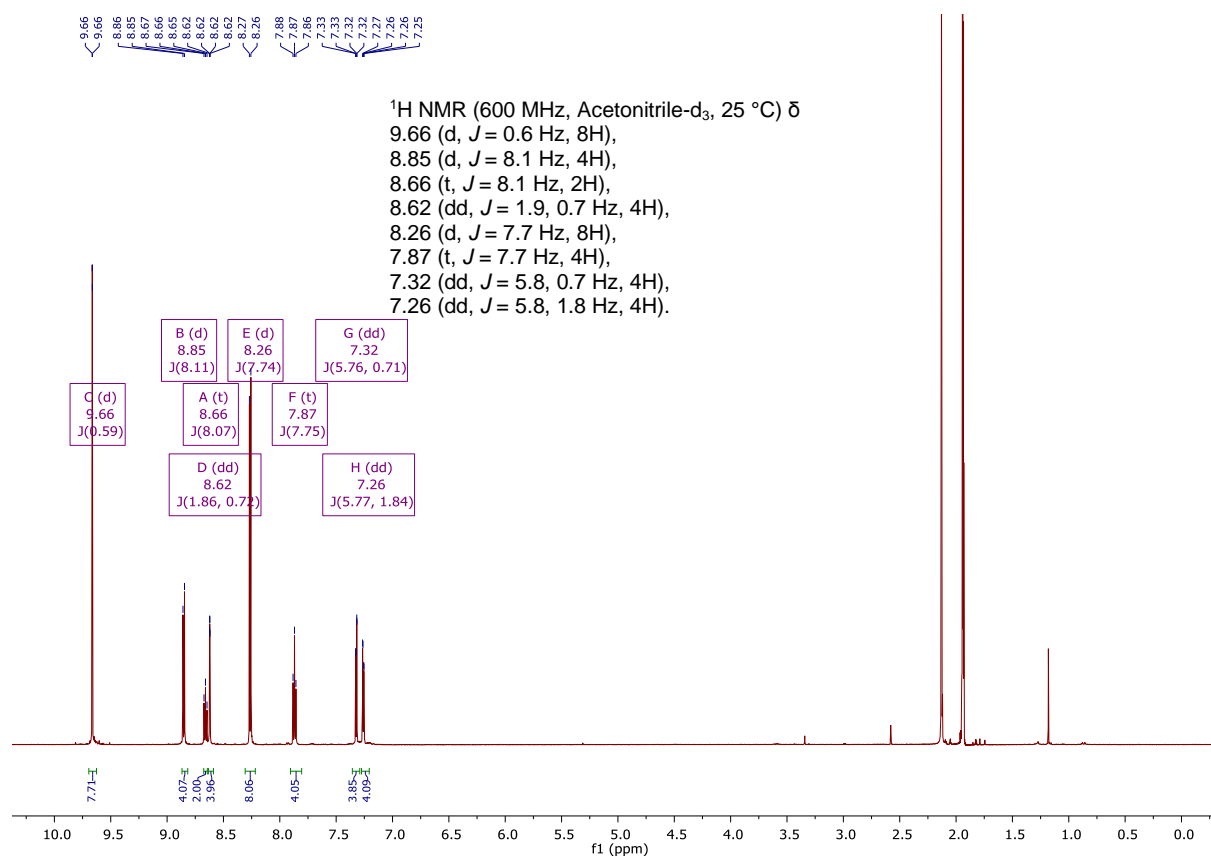

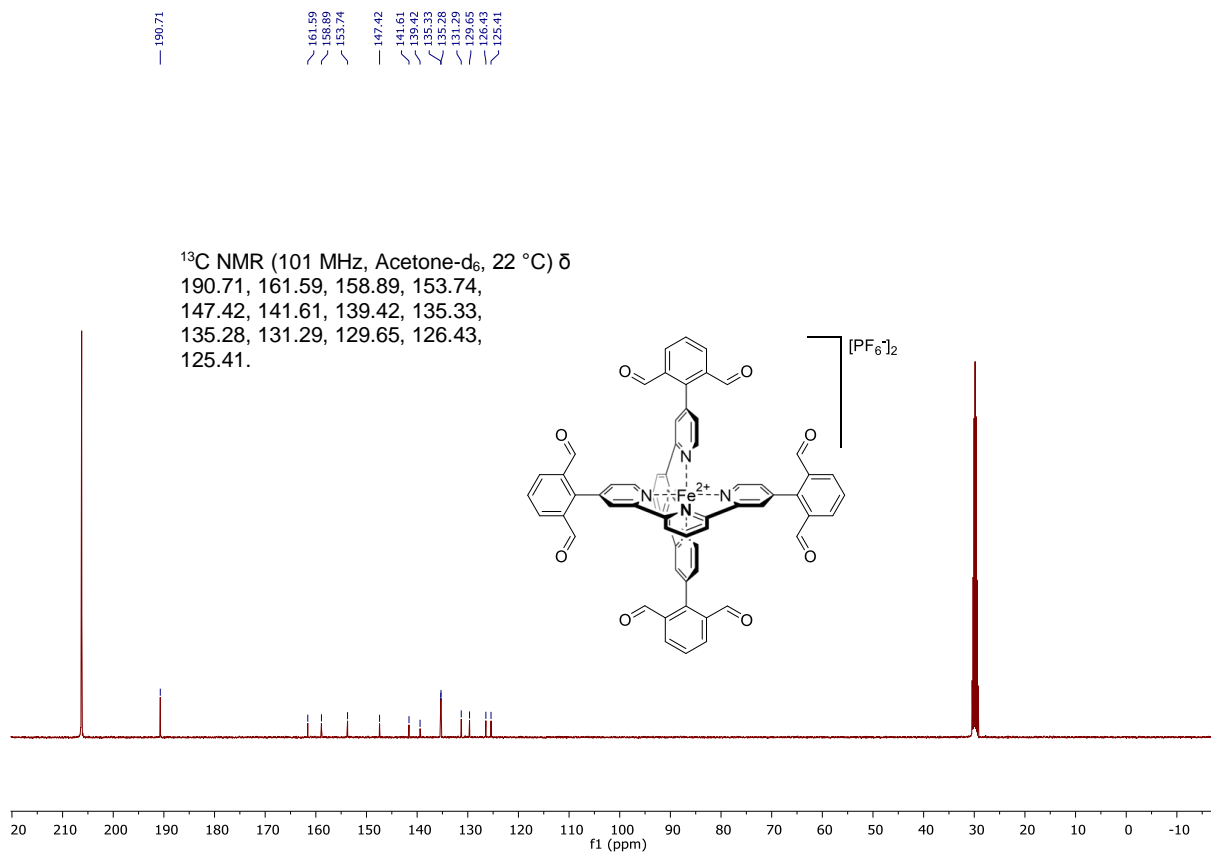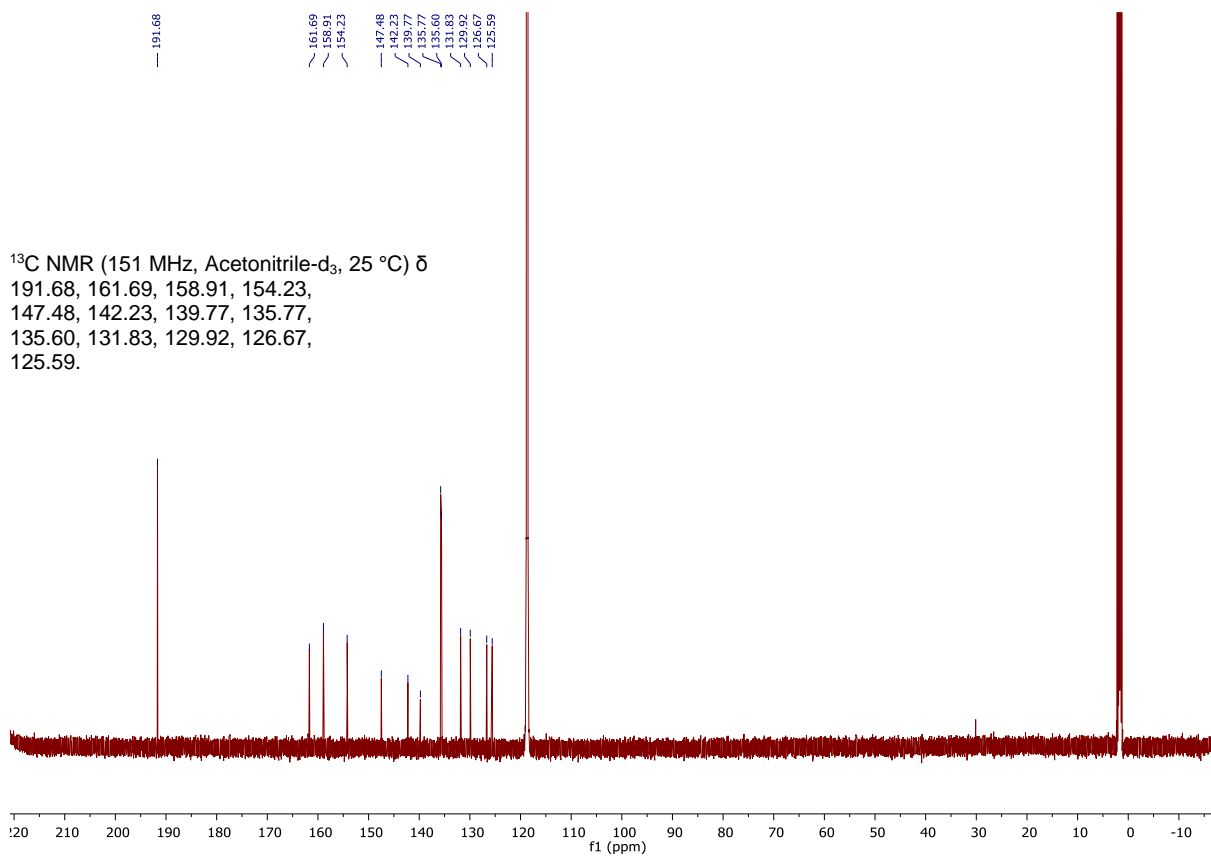

### COSY-NMR spectrum

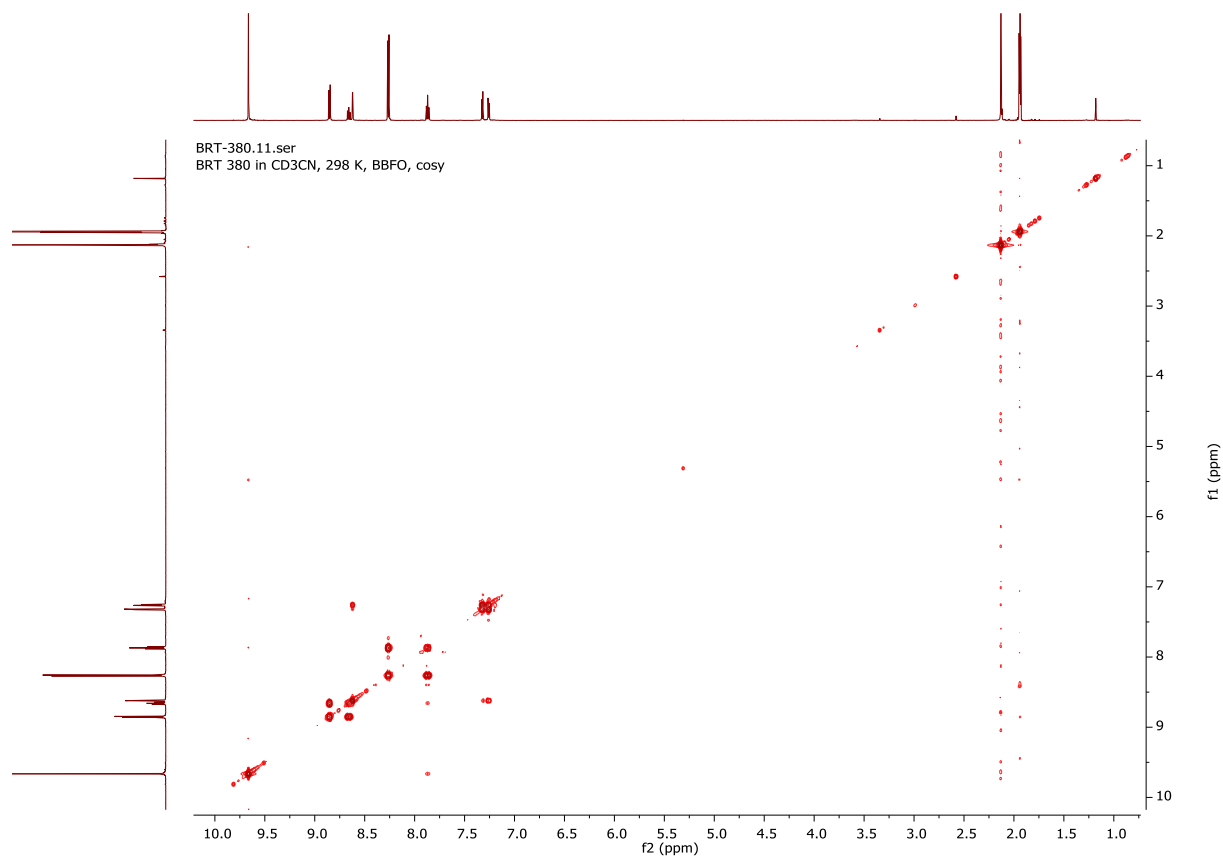

### ROESY-NMR spectrum

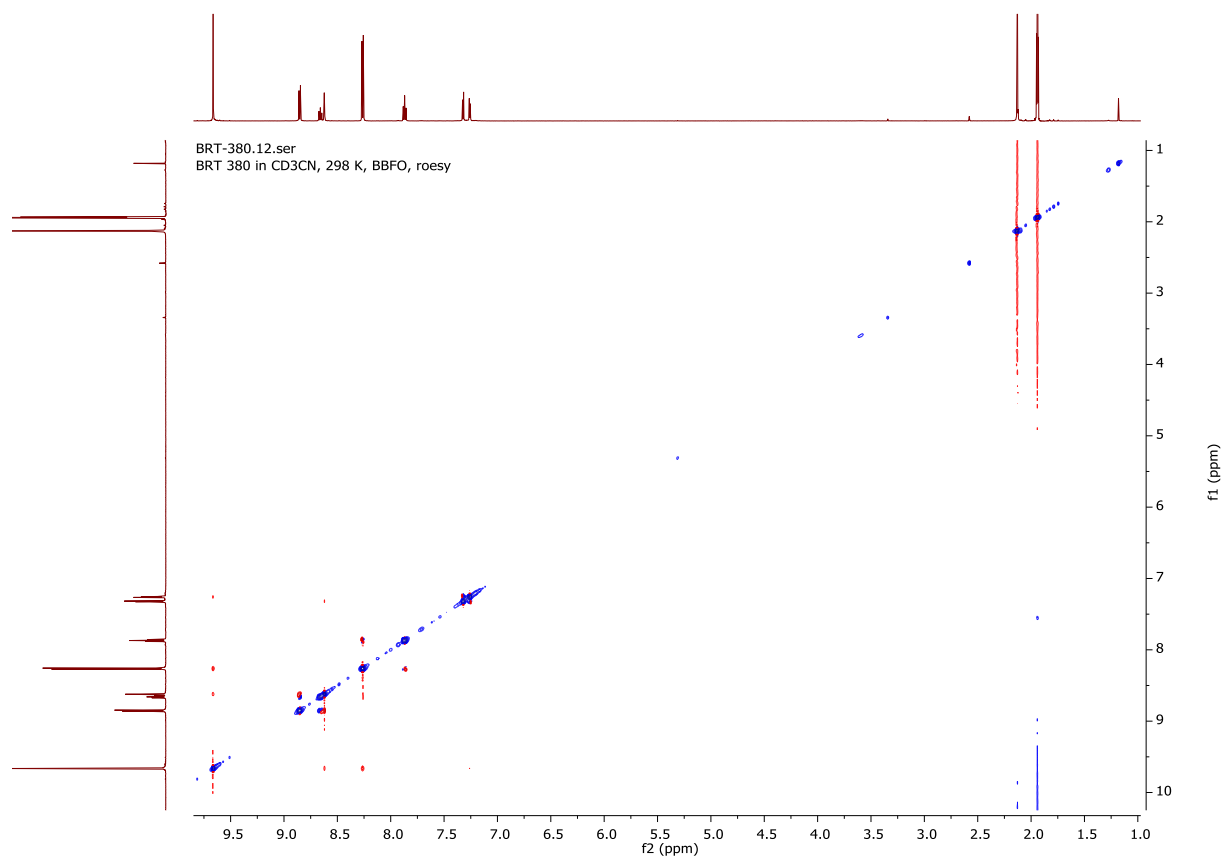



### HSQC-NMR spectrum

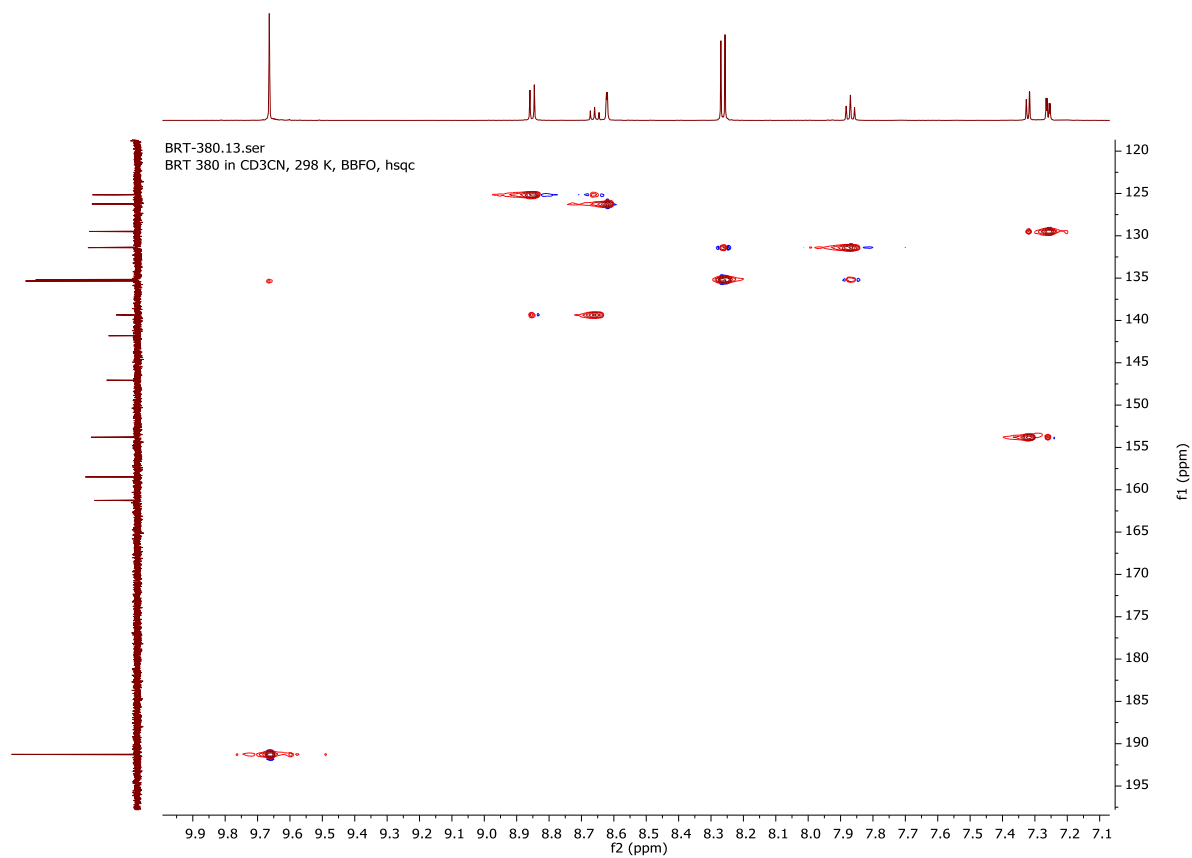

### HMBC-NMR spectrum

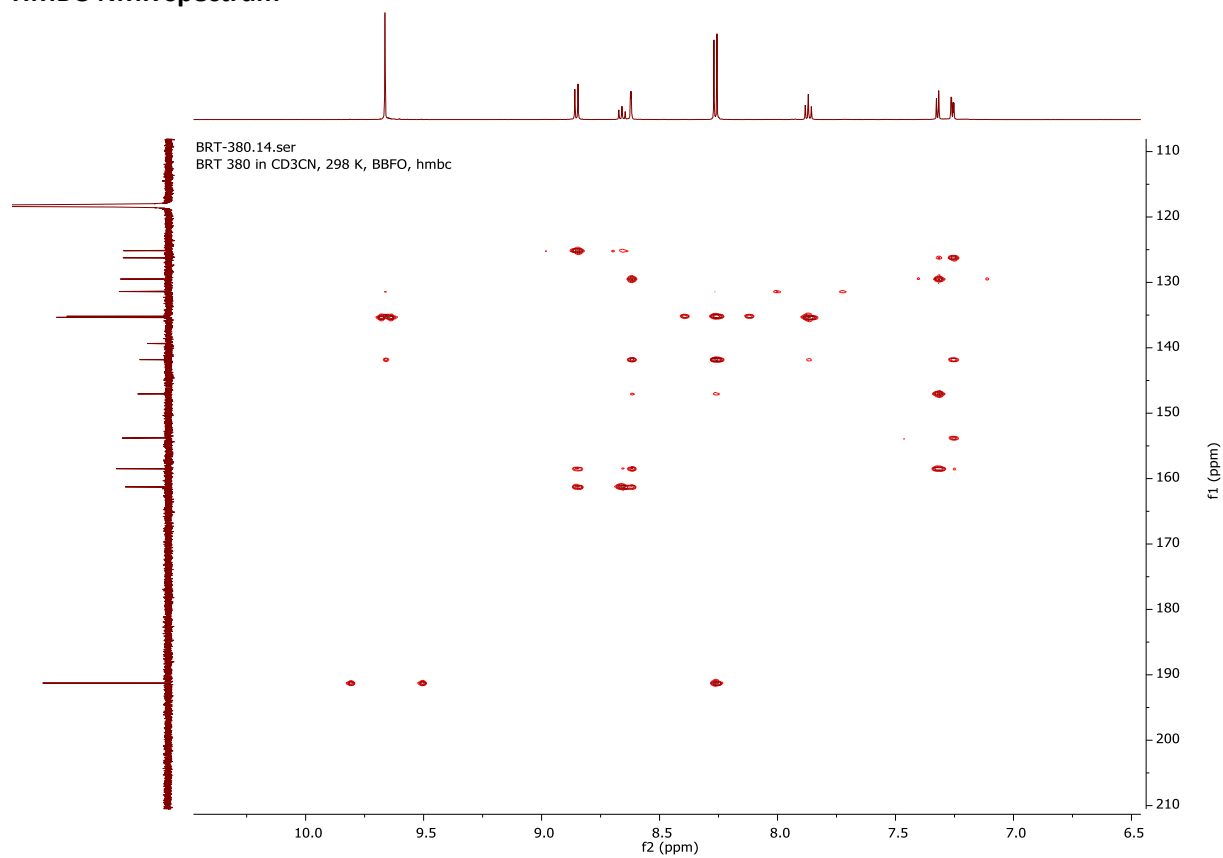

## Full assignment of 8

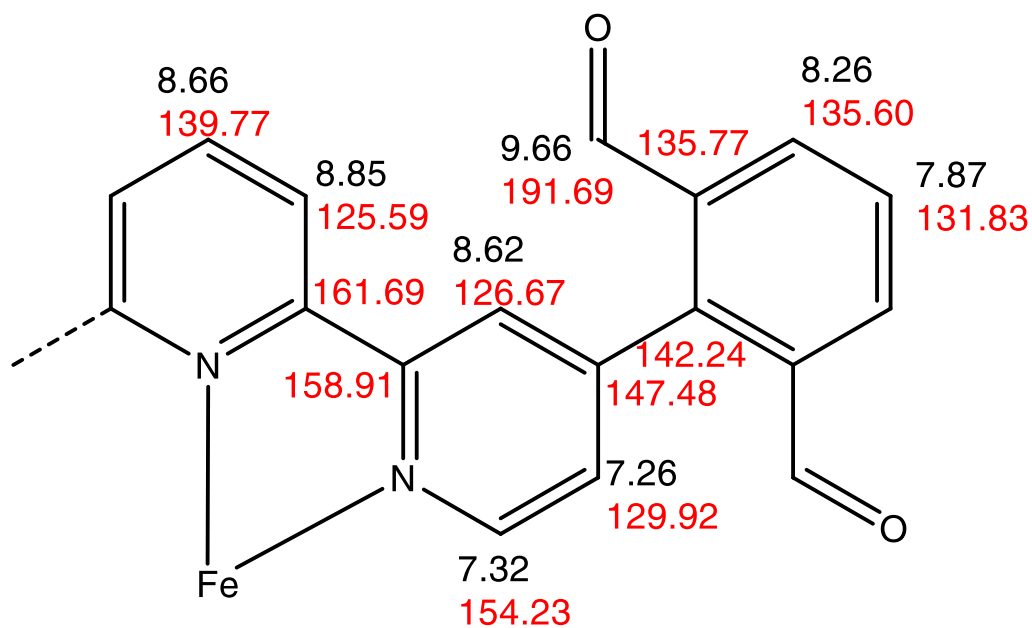

**Figure S11:** Full-assignment of compound **8** in acetonitrile- $d_3$ , 298 K, 600 MHz, BBFO.

# Mass Spectrum SmartFormula Report

**Analysis Info**

|               |                                               |                   |                     |
|---------------|-----------------------------------------------|-------------------|---------------------|
| Analysis Name | N:\new acq data\BRT083 001.d                  | Acquisition Date  | 19.05.2015 15:43:06 |
| Method        | hn Direct_Infusion_pos mode_75-1700 mid 4eV.m | Operator          | hn                  |
| Sample Name   | Thomas Brandl, BRT083                         | Instrument / Ser# | maXis 4G 21243      |
| Comment       | BRT083, ca. 10 ug/ml MeCN                     |                   |                     |

**Acquisition Parameter**

|             |            |                       |           |                            |           |
|-------------|------------|-----------------------|-----------|----------------------------|-----------|
| Source Type | ESI        | Ion Polarity          | Positive  | Set Nebulizer              | 0.4 Bar   |
| Focus       | Not active | Set Capillary         | 3600 V    | Set Dry Heater             | 180 °C    |
| Scan Begin  | 75 m/z     | Set End Plate Offset  | -500 V    | Set Dry Gas                | 4.0 l/min |
| Scan End    | 1700 m/z   | Set Collision Cell RF | 500.0 Vpp | Set Ion Energy ( MS only ) | 4.0 eV    |

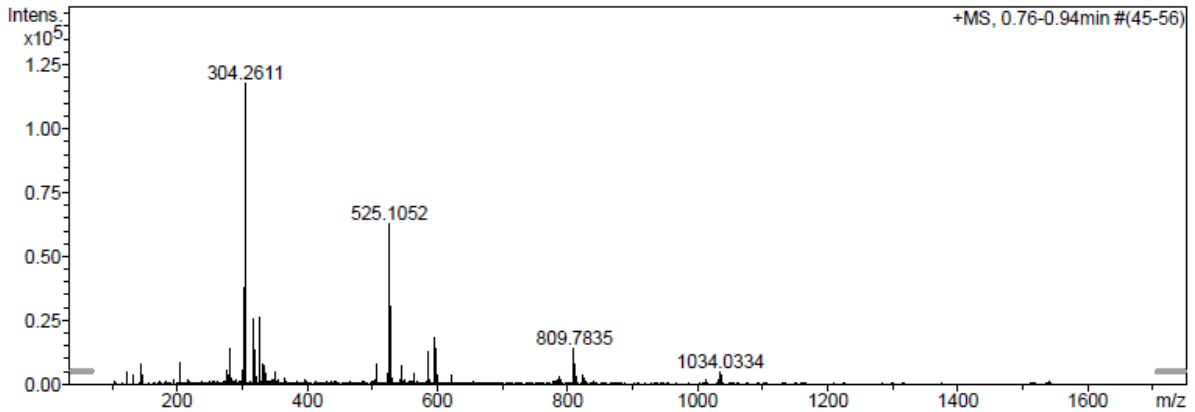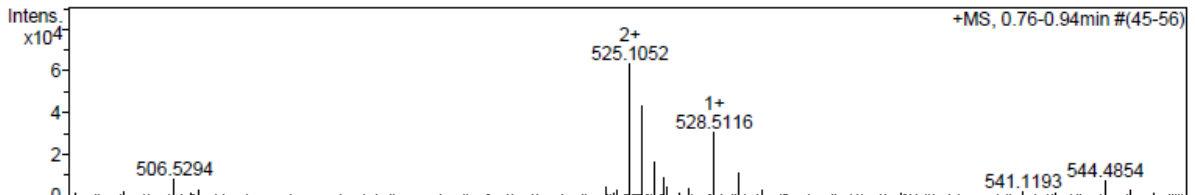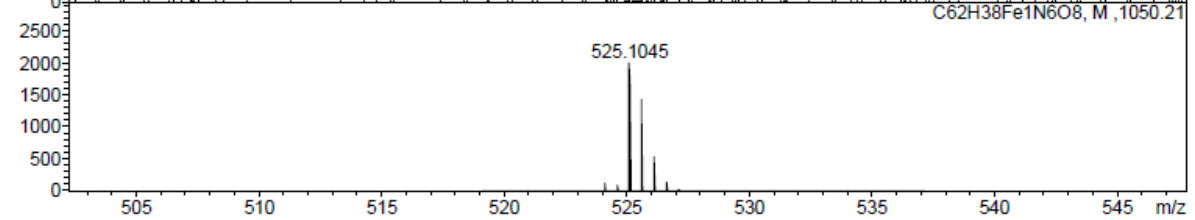

| Meas. m/z | # | Formula              | Score  | m/z      | err [mDa] | err [ppm] | mSigma | rdb  | e <sup>-</sup> Conf | N-Rule | z  |
|-----------|---|----------------------|--------|----------|-----------|-----------|--------|------|---------------------|--------|----|
| 525.1052  | 1 | C 62 H 38 Fe N 6 O 8 | 100.00 | 525.1046 | -0.6      | -1.2      | 12.9   | 47.0 | even                | ok     | 2+ |

# Mass Spectrum SmartFormula Report

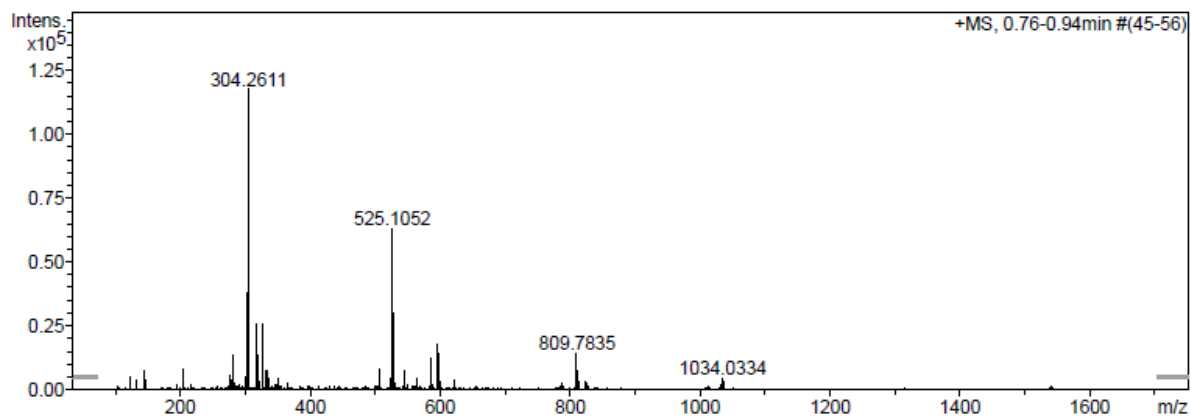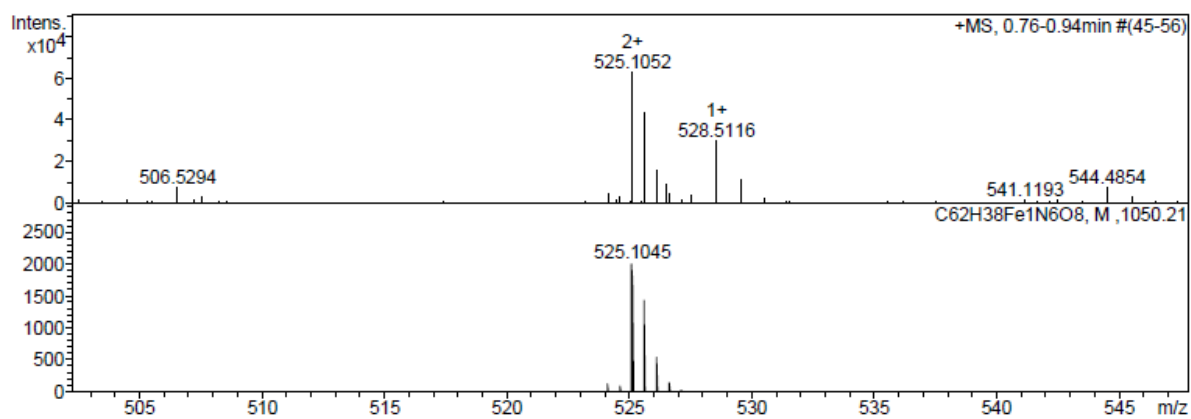

| Meas. m/z | # | Formula | Score | m/z | err [mDa] | err [ppm] | mSigma | rdb | e <sup>-</sup> Conf | N-Rule | z |
|-----------|---|---------|-------|-----|-----------|-----------|--------|-----|---------------------|--------|---|
| 506.5294  |   |         |       |     |           |           |        |     |                     |        |   |
| 525.1052  |   |         |       |     |           |           |        |     |                     |        |   |
| 528.5116  |   |         |       |     |           |           |        |     |                     |        |   |
| 541.1193  |   |         |       |     |           |           |        |     |                     |        |   |
| 544.4854  |   |         |       |     |           |           |        |     |                     |        |   |

# HR-ESI-MS spectra of compound 2

## Mass Spectrum SmartFormula Report

### Analysis Info

Analysis Name N:\new acq data\BRT093 003.d  
 Method hn Direct\_Infusion\_pos mode\_75-2000 higher 4eV.m  
 Sample Name Thomas Brandl, BRT093  
 Comment ca. 10 ug/ml MeCN

Acquisition Date 15.06.2015 17:04:49

Operator hn  
 Instrument / Ser# maXis 4G 21243

### Acquisition Parameter

|             |            |                       |           |                            |           |
|-------------|------------|-----------------------|-----------|----------------------------|-----------|
| Source Type | ESI        | Ion Polarity          | Positive  | Set Nebulizer              | 0.4 Bar   |
| Focus       | Not active | Set Capillary         | 3600 V    | Set Dry Heater             | 180 °C    |
| Scan Begin  | 75 m/z     | Set End Plate Offset  | -500 V    | Set Dry Gas                | 4.0 l/min |
| Scan End    | 2000 m/z   | Set Collision Cell RF | 500.0 Vpp | Set Ion Energy ( MS only ) | 4.0 eV    |

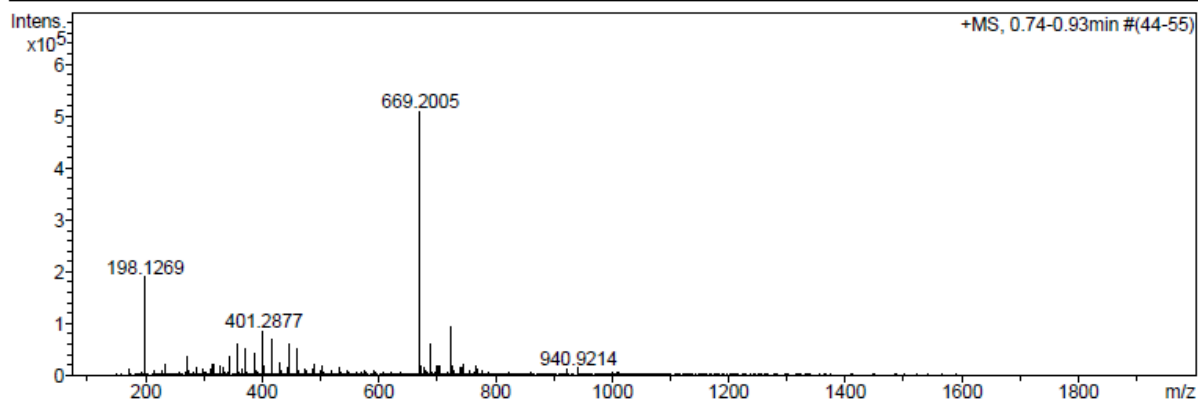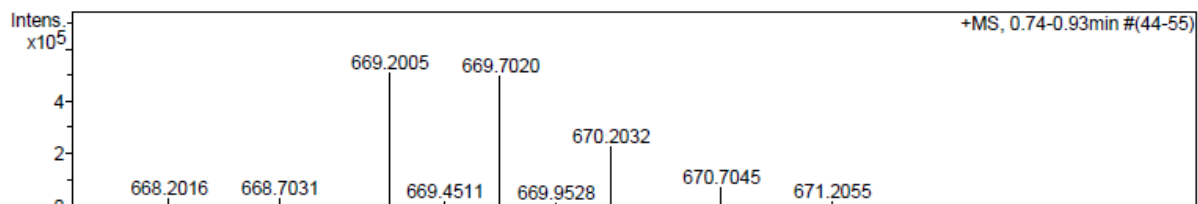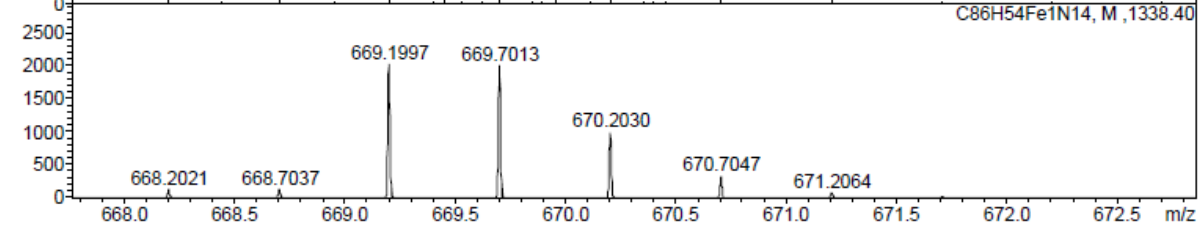

| Meas. m/z | # | Formula           | Score  | m/z      | err [mDa] | err [ppm] | mSigma | rdb  | e <sup>-</sup> Conf | N-Rule | z  |
|-----------|---|-------------------|--------|----------|-----------|-----------|--------|------|---------------------|--------|----|
| 669.2005  | 1 | C 86 H 54 Fe N 14 | 100.00 | 669.1999 | -0.6      | -0.9      | 20.2   | 67.0 | even                | ok     | 2+ |

**<sup>1</sup>H-, <sup>13</sup>C-, COSY-, ROESY-, HSQC-, HMBC-NMR (Acetone-d<sub>6</sub>, 600/151 MHz, 25 °C) with full assignment and HR-ESI-MS spectra of compound 1**

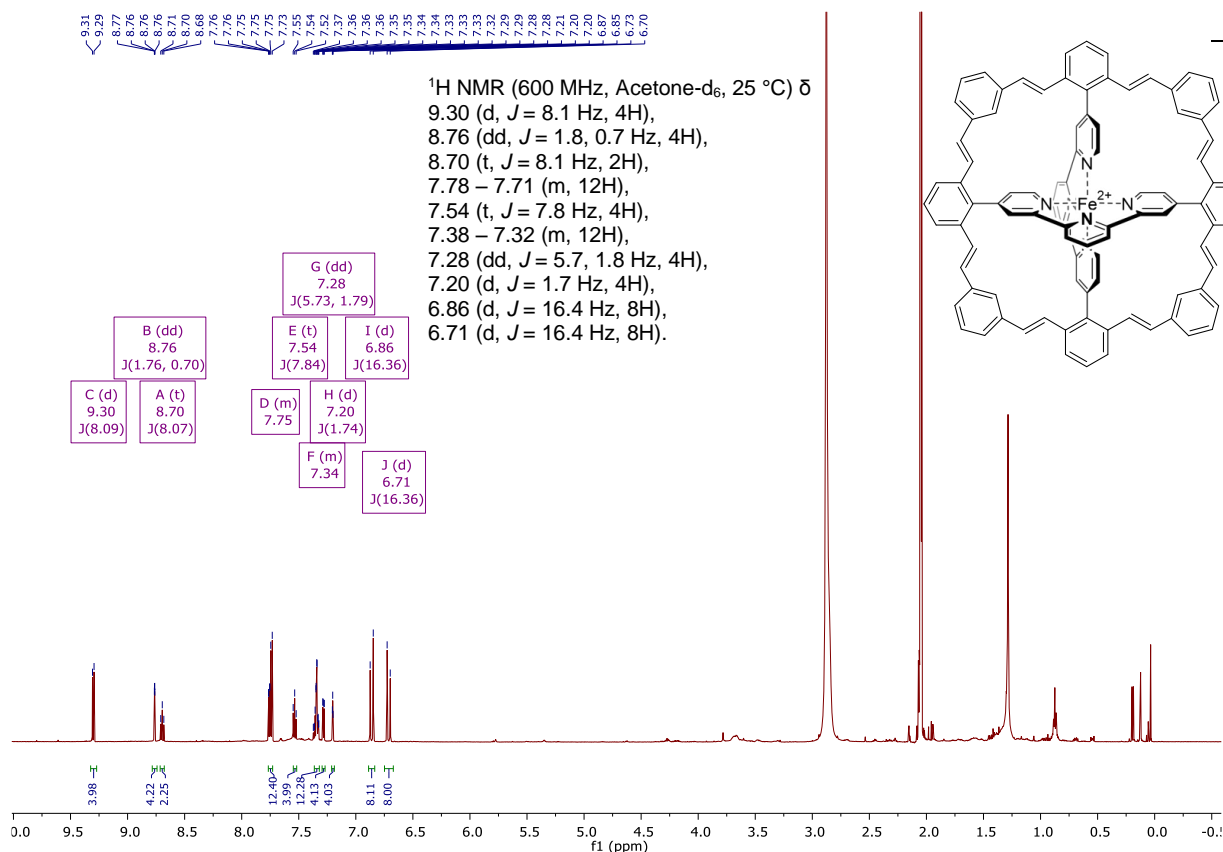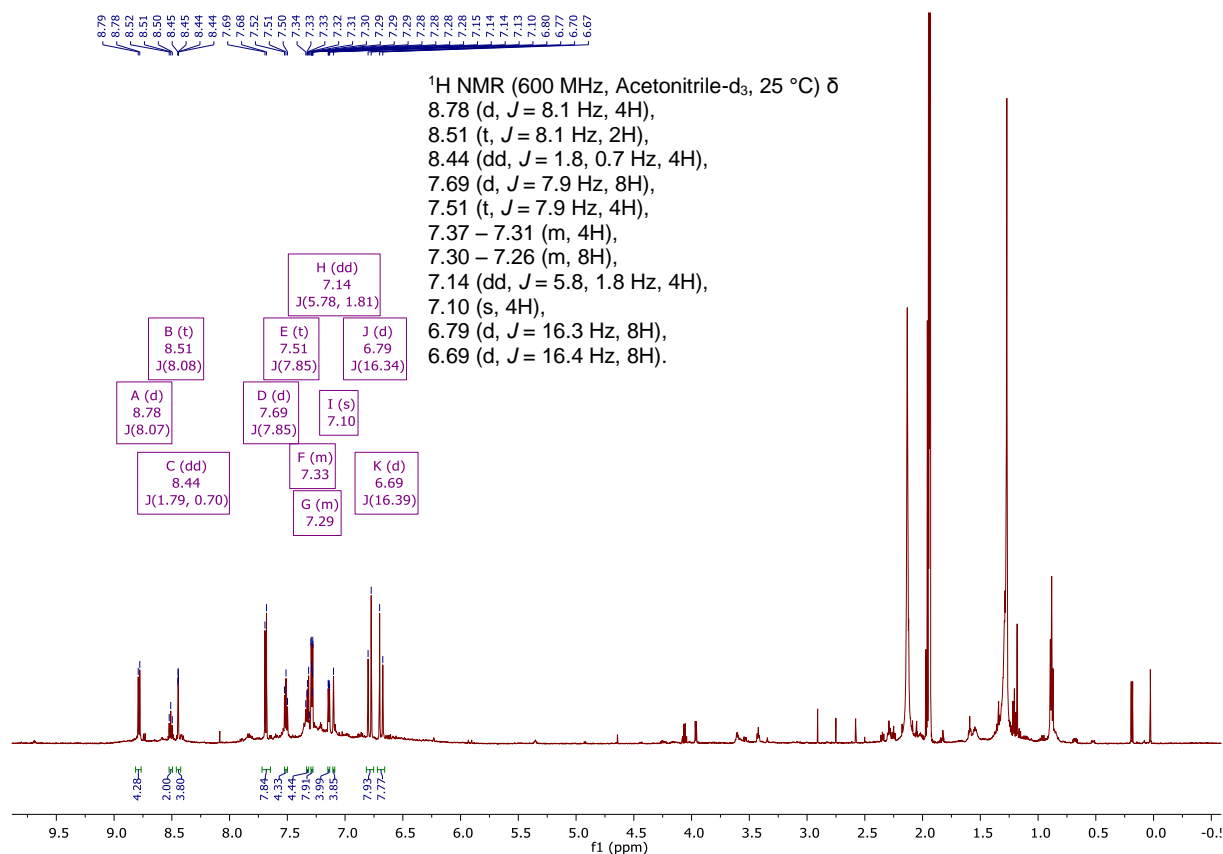

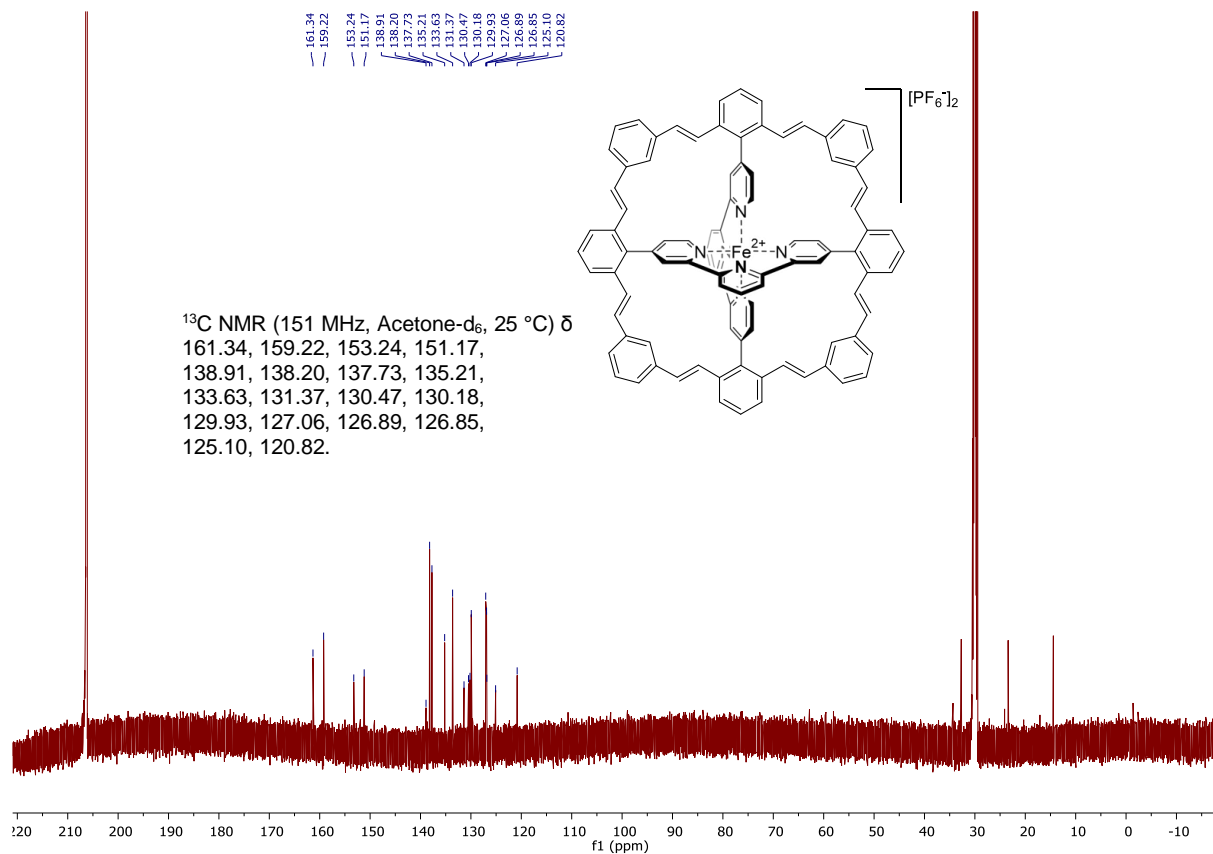

### COSY-NMR spectrum

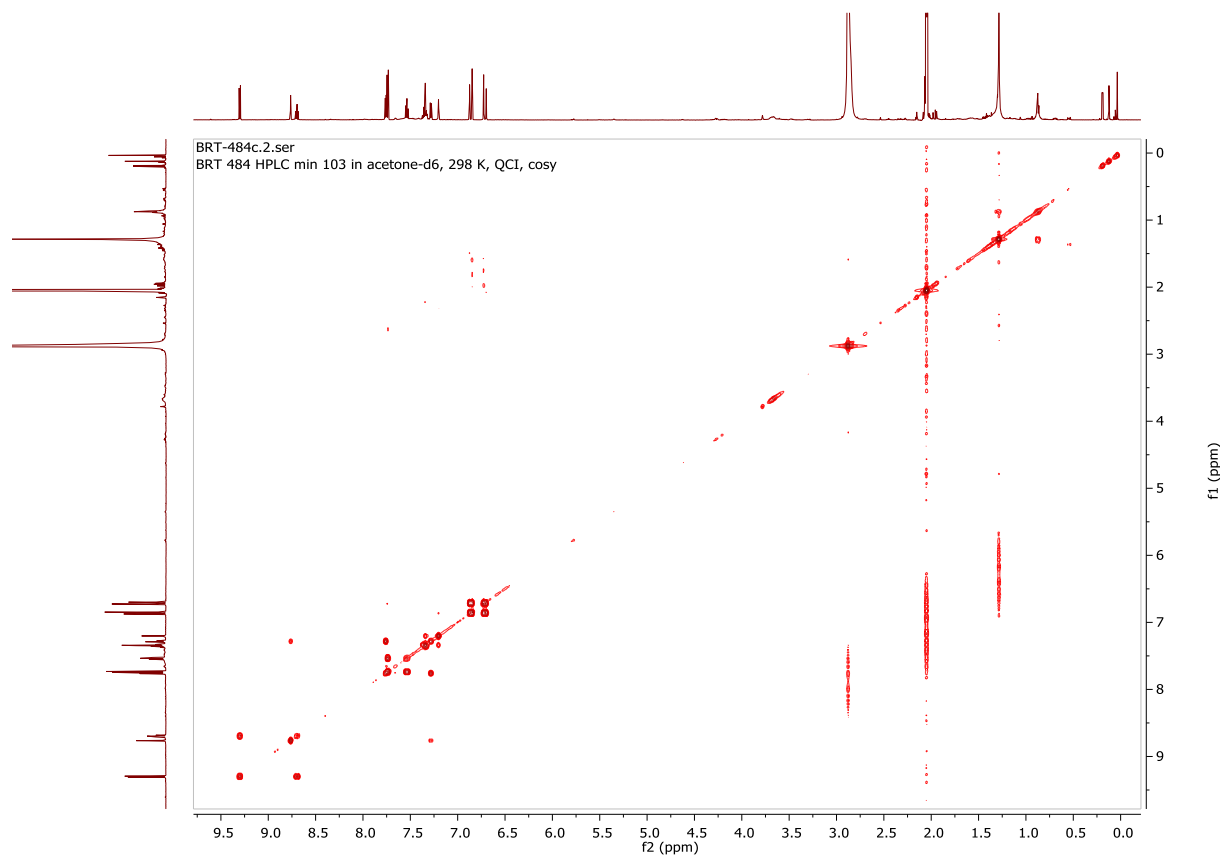

## ROESY-NMR spectrum

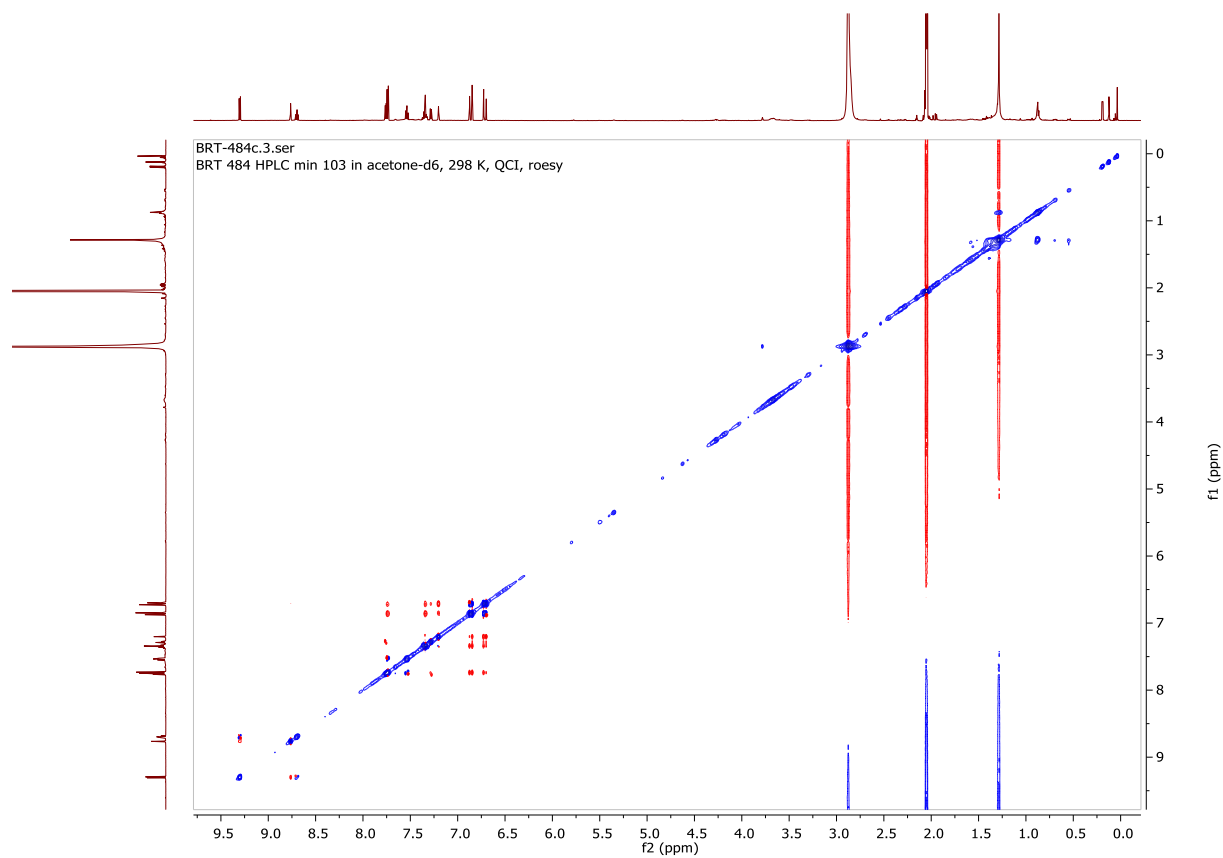

## HSQC-NMR spectrum

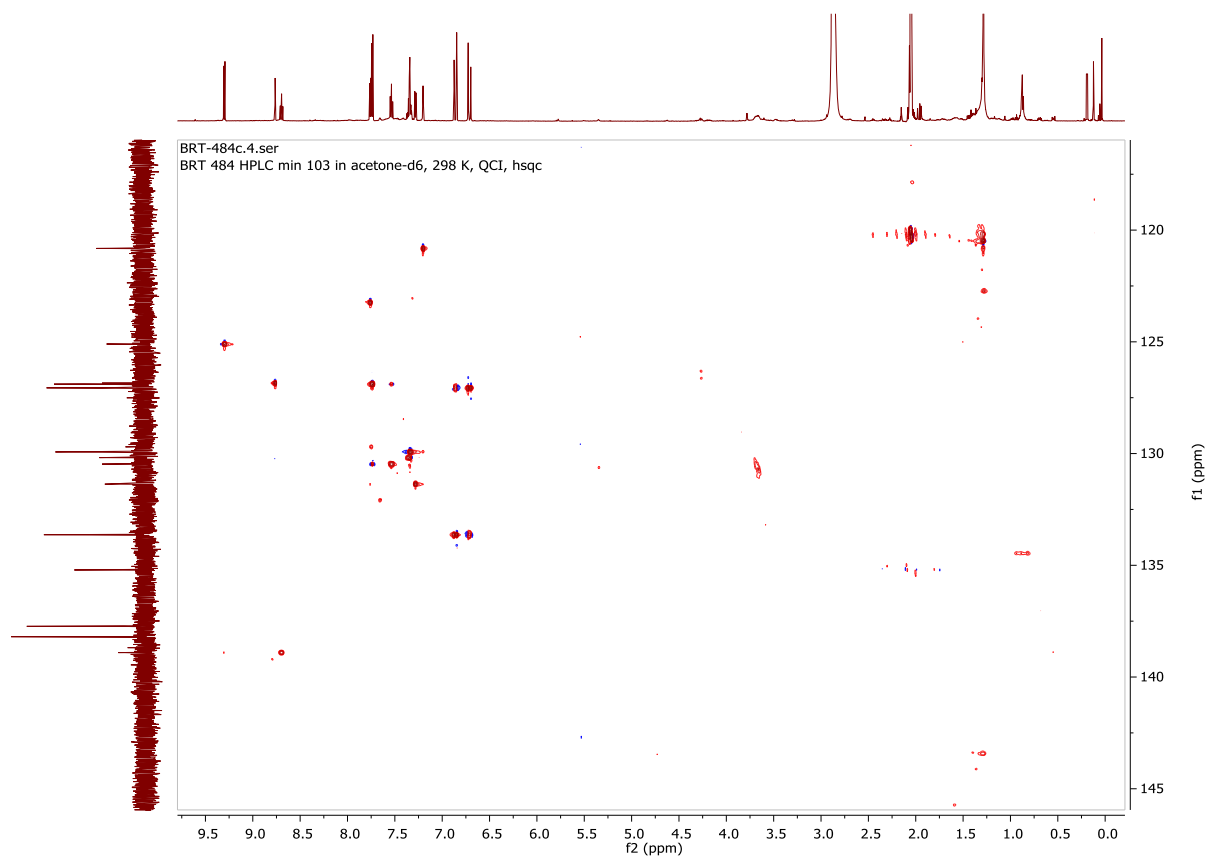



# HMBC-NMR spectrum

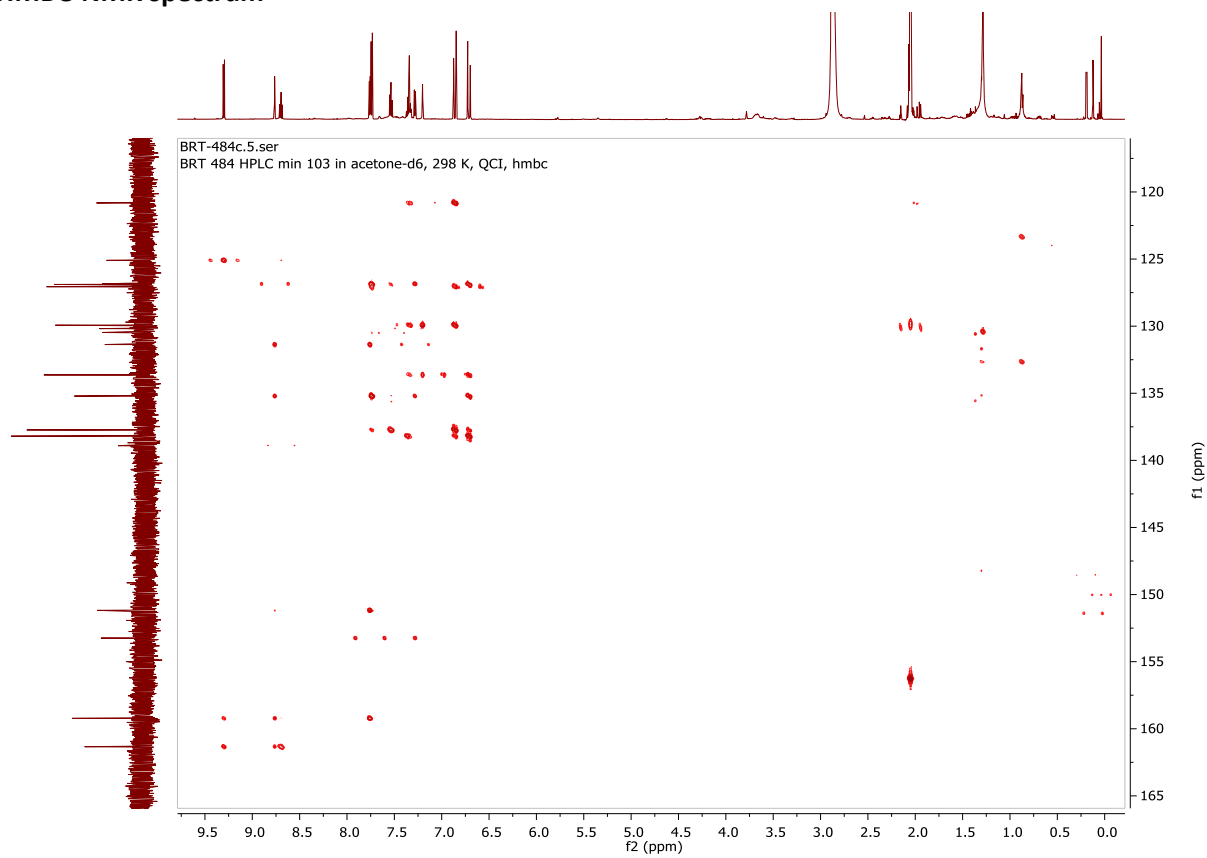

Full assignment of the all-trans isomer of 1

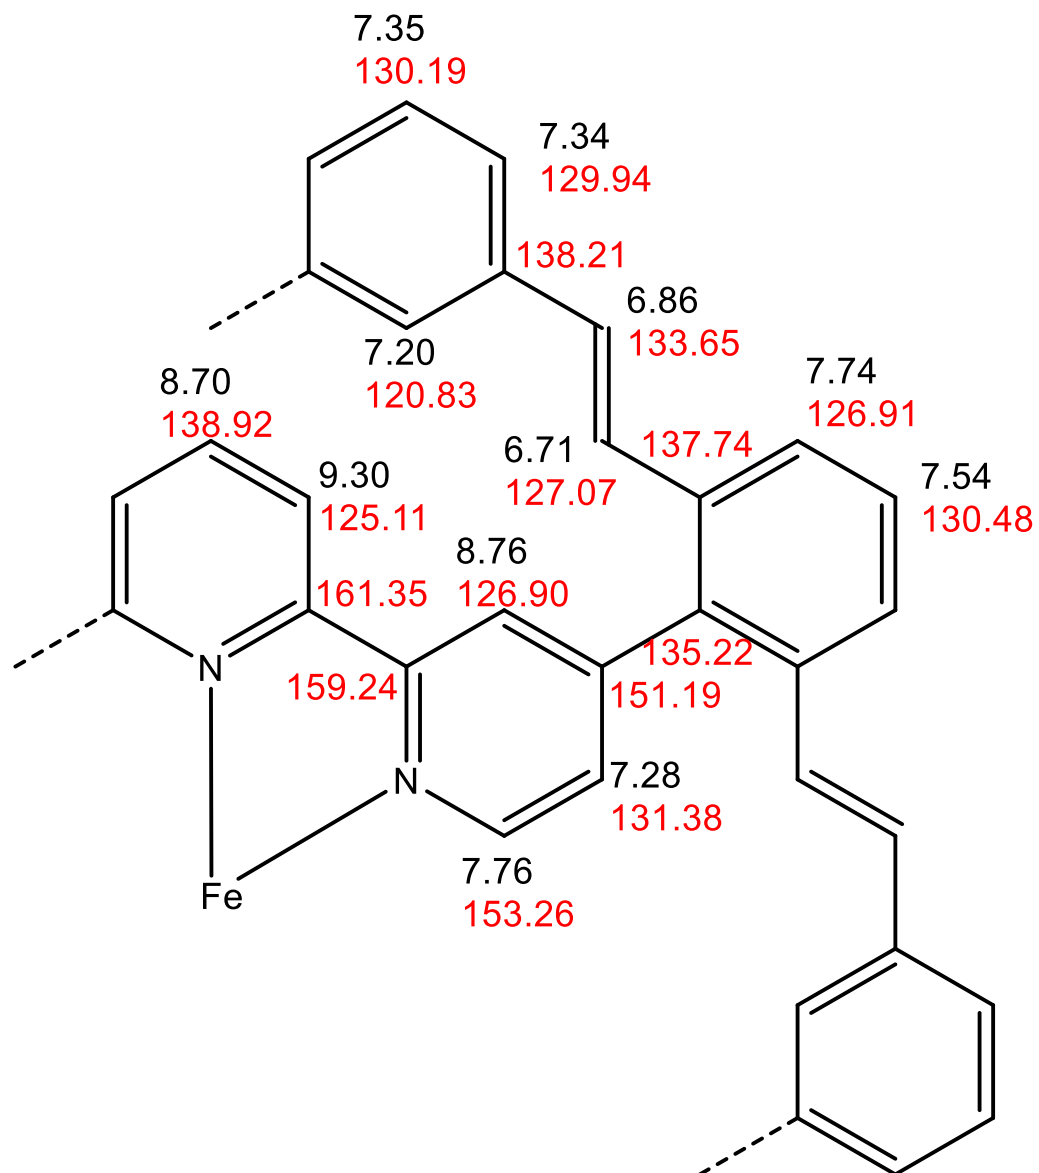

Figure S12: Full-assignment of compound 1 in acetone-d<sub>6</sub>, 298 K, 600 MHz, QCI.

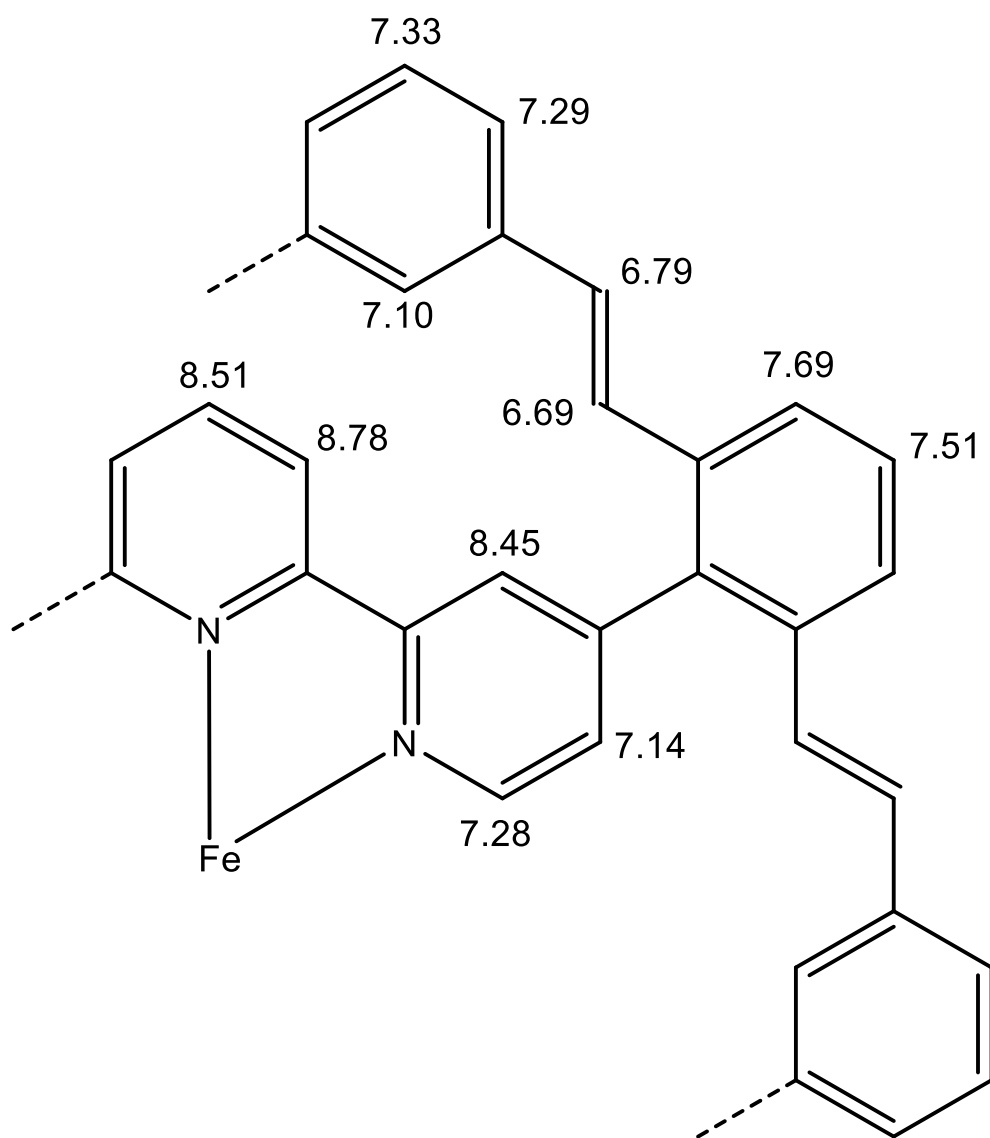

**Figure S13:** Proton-assignment of compound 1 in acetonitrile- $d_3$ , 298 K, 600 MHz, BBFO.

# Mass Spectrum SmartFormula Report

**Analysis Info**

|               |                                                                   |                   |                     |
|---------------|-------------------------------------------------------------------|-------------------|---------------------|
| Analysis Name | E:\ESI Results Backup\AK Mayor\Thomas Brandl\BRT484_HPLC_min103.d | Acquisition Date  | 26.11.2018 10:30:22 |
| Method        | 22 Direct_pos_mid.m                                               | Operator          | Miff                |
| Sample Name   | Thomas Brandl / BRT484_HPLC_min103                                | Instrument / Ser# | maXis 4G 21243      |
| Comment       | 10 ug/mL in acetone, analyzed in acetonitrile                     |                   |                     |

**Acquisition Parameter**

|             |            |                      |          |                            |           |
|-------------|------------|----------------------|----------|----------------------------|-----------|
| Source Type | ESI        | Ion Polarity         | Positive | Set Nebulizer              | 0.4 Bar   |
| Focus       | Not active | Set Capillary        | 3600 V   | Set Dry Heater             | 180 °C    |
| Scan Begin  | 75 m/z     | Set End Plate Offset | -500 V   | Set Dry Gas                | 4.0 l/min |
| Scan End    | 1700 m/z   | Collision Energy     | 8.0 eV   | Set Ion Energy ( MS only ) | 4.0 eV    |

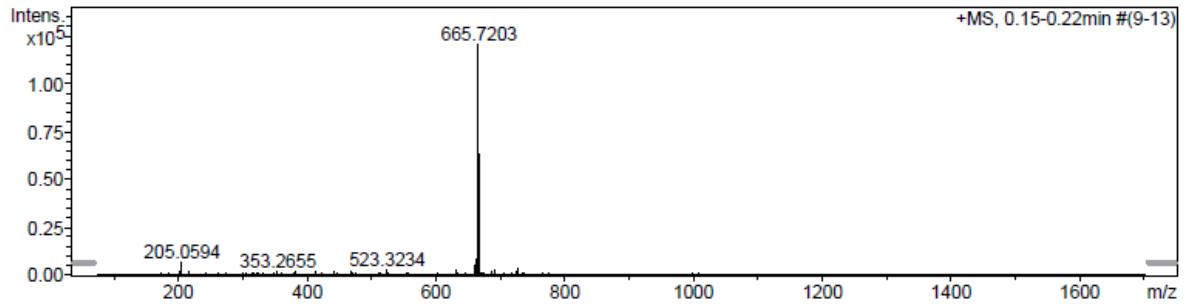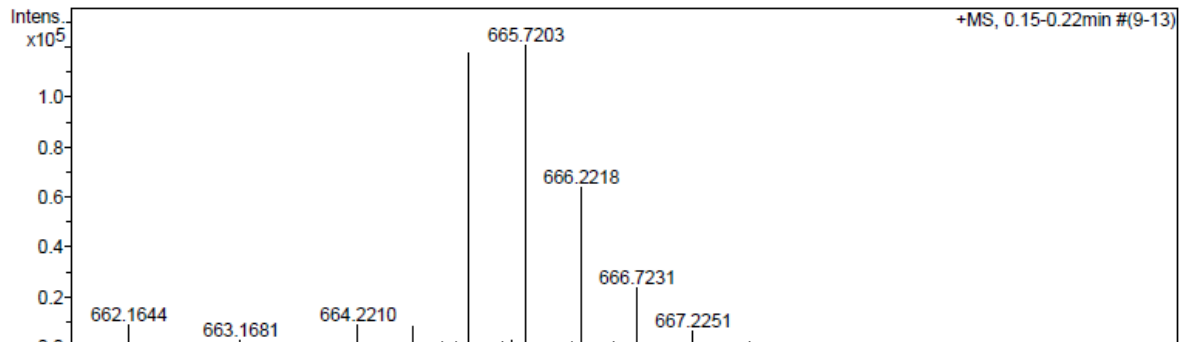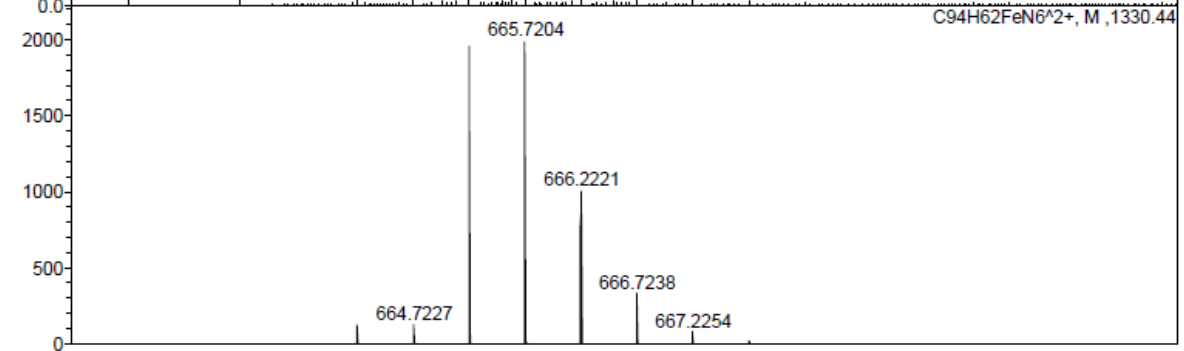

| Meas. m/z | # | Formula          | Score  | m/z      | err [mDa] | err [ppm] | mSigma | rdb  | e <sup>-</sup> Conf | z  |
|-----------|---|------------------|--------|----------|-----------|-----------|--------|------|---------------------|----|
| 665.2189  | 1 | C 94 H 62 Fe N 6 | 100.00 | 665.2188 | -0.1      | -0.2      | 8.2    | 67.0 | even                | 2+ |

## UV-Vis Spectra of Compound 8 and Compound 1

The UV-Vis spectrum of compound **8** was recorded on a Shimadzu UV spectrometer UV-1800. The wavelength was measured in nm. The solution was measured under air saturated conditions in acetonitrile. The spectrum was recorded using optical 1115F-QS Hellma cuvettes (10 mm light path).

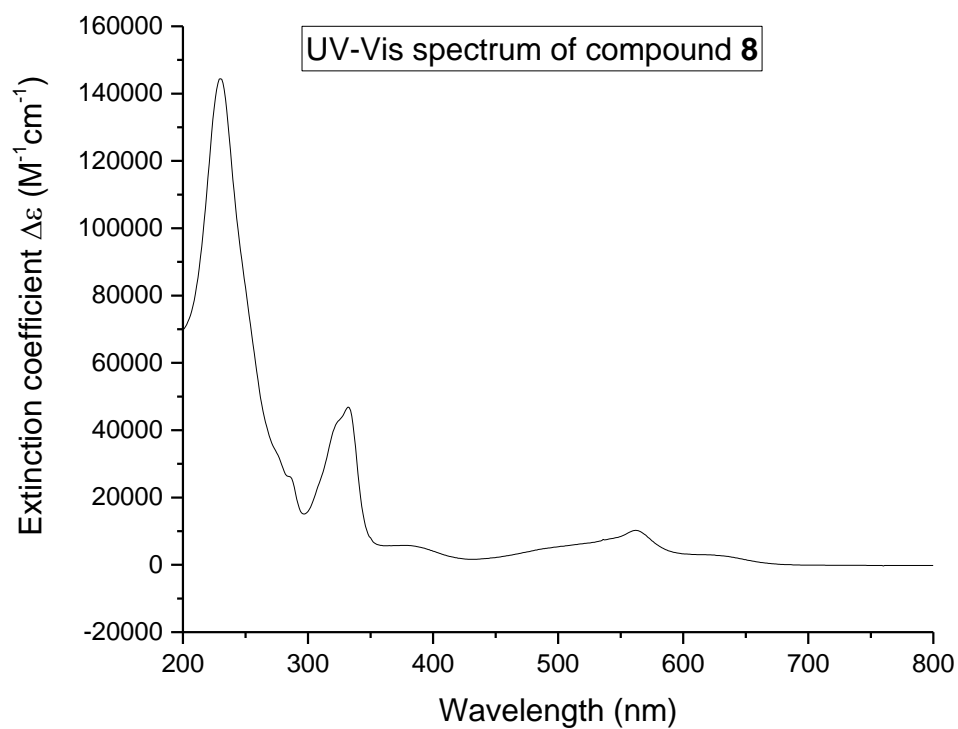

**Figure S14:** UV-Vis spectrum of compound **8**.

**Table S11:** UV-Vis data for compound **8**

| Wavelength<br>$\lambda$ [nm] | Extinction coefficient<br>$\Delta\epsilon$ [ $M^{-1}cm^{-1}$ ] | $\lambda$<br>[nm] | $\Delta\epsilon$ [ $M^{-1}cm^{-1}$ ] | $\lambda$<br>[nm] | $\Delta\epsilon$ [ $M^{-1}cm^{-1}$ ] | $\lambda$<br>[nm] | $\Delta\epsilon$ [ $M^{-1}cm^{-1}$ ] |
|------------------------------|----------------------------------------------------------------|-------------------|--------------------------------------|-------------------|--------------------------------------|-------------------|--------------------------------------|
| 800                          | -161.5508                                                      | 755               | -161.5508                            | 710               | -88.5659                             | 665               | 576.4987                             |
| 799                          | -161.5508                                                      | 754               | -161.5508                            | 709               | -88.5659                             | 664               | 615.0412                             |
| 798                          | -161.5508                                                      | 753               | -161.5508                            | 708               | -88.5659                             | 663               | 661.7844                             |
| 797                          | -161.5508                                                      | 752               | -161.5508                            | 707               | -88.5659                             | 662               | 688.0261                             |
| 796                          | -161.5508                                                      | 751               | -161.5508                            | 706               | -88.5659                             | 661               | 783.9726                             |
| 795                          | -161.5508                                                      | 750               | -161.5508                            | 705               | -88.5659                             | 660               | 822.5152                             |
| 794                          | -161.5508                                                      | 749               | -161.5508                            | 704               | -88.5659                             | 659               | 895.5001                             |
| 793                          | -161.5508                                                      | 748               | -161.5508                            | 703               | -88.5659                             | 658               | 917.6416                             |
| 792                          | -161.5508                                                      | 747               | -161.5508                            | 702               | -88.5659                             | 657               | 1029.9891                            |
| 791                          | -161.5508                                                      | 746               | -151.7101                            | 701               | -88.5659                             | 656               | 1068.5317                            |
| 790                          | -161.5508                                                      | 745               | -151.7101                            | 700               | -88.5659                             | 655               | 1153.8174                            |
| 789                          | -161.5508                                                      | 744               | -151.7101                            | 699               | -88.5659                             | 654               | 1241.5633                            |
| 788                          | -161.5508                                                      | 743               | -151.7101                            | 698               | -76.2651                             | 653               | 1314.5482                            |
| 787                          | -161.5508                                                      | 742               | -151.7101                            | 697               | -76.2651                             | 652               | 1361.2913                            |
| 786                          | -161.5508                                                      | 741               | -151.7101                            | 696               | -76.2651                             | 651               | 1409.6746                            |
| 785                          | -161.5508                                                      | 740               | -151.7101                            | 695               | -59.8640                             | 650               | 1522.0221                            |
| 784                          | -161.5508                                                      | 739               | -151.7101                            | 694               | -59.8640                             | 649               | 1570.4054                            |
| 783                          | -161.5508                                                      | 738               | -139.4093                            | 693               | -50.0233                             | 648               | 1645.8504                            |
| 782                          | -161.5508                                                      | 737               | -151.7101                            | 692               | -50.0233                             | 647               | 1768.0386                            |
| 781                          | -161.5508                                                      | 736               | -151.7101                            | 691               | -50.0233                             | 646               | 1806.5812                            |
| 780                          | -161.5508                                                      | 735               | -151.7101                            | 690               | -50.0233                             | 645               | 1863.1650                            |
| 779                          | -161.5508                                                      | 734               | -151.7101                            | 689               | -37.7225                             | 644               | 1963.2117                            |
| 778                          | -161.5508                                                      | 733               | -151.7101                            | 688               | -27.8818                             | 643               | 2036.1966                            |
| 777                          | -161.5508                                                      | 732               | -151.7101                            | 687               | 21.3214                              | 642               | 2074.7392                            |
| 776                          | -161.5508                                                      | 731               | -139.4093                            | 686               | 62.3241                              | 641               | 2137.8835                            |
| 775                          | -161.5508                                                      | 730               | -139.4093                            | 685               | 62.32418                             | 640               | 2260.0717                            |
| 774                          | -161.5508                                                      | 729               | -139.4093                            | 684               | 74.62501                             | 639               | 2282.2131                            |
| 773                          | -161.5508                                                      | 728               | -123.0082                            | 683               | 84.46567                             | 638               | 2345.3574                            |
| 772                          | -161.5508                                                      | 727               | -123.0082                            | 682               | 84.46567                             | 637               | 2433.1033                            |
| 771                          | -161.5508                                                      | 726               | -123.0082                            | 681               | 84.46567                             | 636               | 2489.6871                            |
| 770                          | -161.5508                                                      | 725               | -123.0082                            | 680               | 110.7074                             | 635               | 2528.2297                            |
| 769                          | -161.5508                                                      | 724               | -123.0082                            | 679               | 123.0082                             | 634               | 2554.4714                            |
| 768                          | -161.5508                                                      | 723               | -123.0082                            | 678               | 123.0082                             | 633               | 2591.3739                            |
| 767                          | -161.5508                                                      | 722               | -123.0082                            | 677               | 157.4505                             | 632               | 2662.7187                            |
| 766                          | -161.5508                                                      | 721               | -123.0082                            | 676               | 186.1525                             | 631               | 2688.9605                            |
| 765                          | -161.5508                                                      | 720               | -123.0082                            | 675               | 195.9931                             | 630               | 2735.7036                            |
| 764                          | -161.5508                                                      | 719               | -123.0082                            | 674               | 257.4972                             | 629               | 2752.1047                            |
| 763                          | -161.5508                                                      | 718               | -123.0082                            | 673               | 291.9396                             | 628               | 2774.2462                            |
| 762                          | -161.5508                                                      | 717               | -123.0082                            | 672               | 330.4821                             | 627               | 2784.0868                            |
| 761                          | -161.5508                                                      | 716               | -123.0082                            | 671               | 330.4821                             | 626               | 2837.3904                            |
| 760                          | -351.8036                                                      | 715               | -123.0082                            | 670               | 369.0247                             | 625               | 2896.4344                            |
| 759                          | -161.5508                                                      | 714               | -123.0082                            | 669               | 403.4670                             | 624               | 2908.7352                            |
| 758                          | -161.5508                                                      | 713               | -98.4066                             | 668               | 442.0096                             | 623               | 2934.9770                            |
| 757                          | -161.5508                                                      | 712               | -98.4066                             | 667               | 503.5138                             | 622               | 2959.5786                            |
| 756                          | -161.5508                                                      | 711               | -98.4066                             | 666               | 537.9561                             | 621               | 2971.8794                            |

| $\lambda$<br>[nm] | $\Delta\varepsilon$ [ $M^{-1} cm^{-1}$ ] | $\lambda$<br>[nm] | $\Delta\varepsilon$ [ $M^{-1} cm^{-1}$ ] | $\lambda$<br>[nm] | $\Delta\varepsilon$ [ $M^{-1} cm^{-1}$ ] | $\lambda$<br>[nm] | $\Delta\varepsilon$ [ $M^{-1} cm^{-1}$ ] |
|-------------------|------------------------------------------|-------------------|------------------------------------------|-------------------|------------------------------------------|-------------------|------------------------------------------|
| 620               | 2981.7201                                | 574               | 7489.5627                                | 528               | 6666.2274                                | 482               | 4380.7340                                |
| 619               | 2981.7201                                | 573               | 7847.9267                                | 527               | 6617.8442                                | 481               | 4307.7491                                |
| 618               | 2998.1212                                | 572               | 8125.9254                                | 526               | 6554.6999                                | 480               | 4195.4016                                |
| 617               | 3010.4220                                | 571               | 8496.5903                                | 525               | 6495.6560                                | 479               | 4147.0183                                |
| 616               | 3020.2627                                | 570               | 8815.5917                                | 524               | 6466.9540                                | 478               | 4061.7326                                |
| 615               | 3020.2627                                | 569               | 9071.4489                                | 523               | 6420.2109                                | 477               | 3949.3851                                |
| 614               | 3020.2627                                | 568               | 9346.1673                                | 522               | 6381.6683                                | 476               | 3901.0018                                |
| 613               | 3020.2627                                | 567               | 9575.7827                                | 521               | 6371.8277                                | 475               | 3854.2587                                |
| 612               | 3020.2627                                | 566               | 9821.7992                                | 520               | 6259.4801                                | 474               | 3744.3713                                |
| 611               | 3020.2627                                | 565               | 10007.1317                               | 519               | 6237.3386                                | 473               | 3681.2271                                |
| 610               | 3067.0058                                | 564               | 10167.8625                               | 518               | 6211.0969                                | 472               | 3608.2422                                |
| 609               | 3083.4069                                | 563               | 10202.3048                               | 517               | 6164.3537                                | 471               | 3520.4963                                |
| 608               | 3083.4069                                | 562               | 10253.1482                               | 516               | 6135.6518                                | 470               | 3435.2105                                |
| 607               | 3083.4069                                | 561               | 10202.3048                               | 515               | 6039.7054                                | 469               | 3396.668                                 |
| 606               | 3142.4509                                | 560               | 10151.4614                               | 514               | 6013.4636                                | 468               | 3290.8809                                |
| 605               | 3154.7517                                | 559               | 10007.1317                               | 513               | 5991.3221                                | 467               | 3227.7366                                |
| 604               | 3171.1528                                | 558               | 9821.7992                                | 512               | 5928.1779                                | 466               | 3189.1940                                |
| 603               | 3205.5951                                | 557               | 9697.9709                                | 511               | 5889.6353                                | 465               | 3067.0058                                |
| 602               | 3217.8960                                | 556               | 9490.4970                                | 510               | 5830.5913                                | 464               | 3028.4632                                |
| 601               | 3227.7366                                | 555               | 9307.6247                                | 509               | 5767.4471                                | 463               | 2943.1775                                |
| 600               | 3266.2792                                | 554               | 9100.1508                                | 508               | 5745.3056                                | 462               | 2847.2311                                |
| 599               | 3300.7215                                | 553               | 8900.8774                                | 507               | 5694.4622                                | 461               | 2808.6885                                |
| 598               | 3388.4674                                | 552               | 8742.6068                                | 506               | 5672.3207                                | 460               | 2735.7036                                |
| 597               | 3451.6116                                | 551               | 8569.5752                                | 505               | 5584.5748                                | 459               | 2697.1610                                |
| 596               | 3473.7531                                | 550               | 8425.2455                                | 504               | 5537.8317                                | 458               | 2601.2146                                |
| 595               | 3536.8974                                | 549               | 8323.5587                                | 503               | 5511.5899                                | 457               | 2562.6720                                |
| 594               | 3624.6433                                | 548               | 8189.0696                                | 502               | 5499.2891                                | 456               | 2499.5277                                |
| 593               | 3697.6282                                | 547               | 8116.0847                                | 501               | 5426.3042                                | 455               | 2479.8464                                |
| 592               | 3758.3122                                | 546               | 8055.4007                                | 500               | 5348.3990                                | 454               | 2367.4989                                |
| 591               | 3880.5004                                | 545               | 7943.0531                                | 499               | 5313.9567                                | 453               | 2328.9563                                |
| 590               | 3965.7862                                | 544               | 7879.9089                                | 498               | 5275.4141                                | 452               | 2282.2131                                |
| 589               | 4110.1158                                | 543               | 7831.5256                                | 497               | 5253.2726                                | 451               | 2243.6706                                |
| 588               | 4211.8027                                | 542               | 7735.5792                                | 496               | 5190.1283                                | 450               | 2172.3258                                |
| 587               | 4372.5335                                | 541               | 7697.0366                                | 495               | 5131.0844                                | 449               | 2121.4824                                |
| 586               | 4504.5623                                | 540               | 7624.0517                                | 494               | 5067.9401                                | 448               | 2109.1815                                |
| 585               | 4677.5939                                | 539               | 7526.4652                                | 493               | 5029.3976                                | 447               | 2070.6389                                |
| 584               | 4901.4690                                | 538               | 7451.0201                                | 492               | 5007.2561                                | 446               | 2036.1966                                |
| 583               | 5084.3412                                | 537               | 7419.0380                                | 491               | 4894.9085                                | 445               | 1948.4507                                |
| 582               | 5291.8152                                | 536               | 7564.1877                                | 490               | 4885.0679                                | 444               | 1926.3093                                |
| 581               | 5527.9910                                | 535               | 7254.2069                                | 489               | 4821.9236                                | 443               | 1901.7076                                |
| 580               | 5774.0075                                | 534               | 7119.7179                                | 488               | 4783.3810                                | 442               | 1863.1650                                |
| 579               | 6029.8647                                | 533               | 7046.7330                                | 487               | 4677.5939                                | 441               | 1853.3244                                |
| 578               | 6275.8812                                | 532               | 6949.1464                                | 486               | 4639.0513                                | 440               | 1816.4219                                |
| 577               | 6544.0392                                | 531               | 6873.7013                                | 485               | 4575.9071                                | 439               | 1790.1801                                |
| 576               | 6902.4033                                | 530               | 6800.7165                                | 484               | 4537.3645                                | 438               | 1728.6760                                |
| 575               | 7170.5613                                | 529               | 6712.9706                                | 483               | 4419.2766                                | 437               | 1718.8353                                |

| $\lambda$<br>[nm] | $\Delta\varepsilon$ [ $M^{-1} \text{ cm}^{-1}$ ] | $\lambda$<br>[nm] | $\Delta\varepsilon$ [ $M^{-1} \text{ cm}^{-1}$ ] | $\lambda$<br>[nm] | $\Delta\varepsilon$ [ $M^{-1} \text{ cm}^{-1}$ ] | $\lambda$<br>[nm] | $\Delta\varepsilon$ [ $M^{-1} \text{ cm}^{-1}$ ] |
|-------------------|--------------------------------------------------|-------------------|--------------------------------------------------|-------------------|--------------------------------------------------|-------------------|--------------------------------------------------|
| 436               | 1677.8326                                        | 390               | 5201.6091                                        | 344               | 15050.4702                                       | 298               | 15188.2395                                       |
| 435               | 1655.6911                                        | 389               | 5274.5940                                        | 343               | 17382.7068                                       | 297               | 15102.9537                                       |
| 434               | 1655.6911                                        | 388               | 5386.9416                                        | 342               | 20168.4338                                       | 296               | 15125.0952                                       |
| 433               | 1655.6911                                        | 387               | 5435.3248                                        | 341               | 23292.0234                                       | 295               | 15399.8137                                       |
| 432               | 1655.6911                                        | 386               | 5498.4690                                        | 340               | 27056.8961                                       | 294               | 15926.2890                                       |
| 431               | 1655.6911                                        | 385               | 5561.6133                                        | 339               | 30994.8005                                       | 293               | 16808.6682                                       |
| 430               | 1655.6911                                        | 384               | 5632.9581                                        | 338               | 34947.4658                                       | 292               | 18051.0516                                       |
| 429               | 1655.6911                                        | 383               | 5671.5007                                        | 337               | 38470.4223                                       | 291               | 19536.9914                                       |
| 428               | 1655.6911                                        | 382               | 5718.2438                                        | 336               | 41653.0559                                       | 290               | 21252.5465                                       |
| 427               | 1677.8326                                        | 381               | 5744.4856                                        | 335               | 44157.5040                                       | 289               | 23062.4080                                       |
| 426               | 1718.8353                                        | 380               | 5756.7864                                        | 334               | 45853.3778                                       | 288               | 24634.4535                                       |
| 425               | 1740.9768                                        | 379               | 5756.7864                                        | 333               | 46717.7159                                       | 287               | 25630.8204                                       |
| 424               | 1816.4219                                        | 378               | 5766.6270                                        | 332               | 46878.4467                                       | 286               | 26106.4523                                       |
| 423               | 1853.3244                                        | 377               | 5766.6270                                        | 331               | 46520.0826                                       | 285               | 26232.7408                                       |
| 422               | 1891.8669                                        | 376               | 5766.6270                                        | 330               | 45836.9767                                       | 284               | 26291.7848                                       |
| 421               | 1948.4507                                        | 375               | 5756.7864                                        | 329               | 45078.4258                                       | 283               | 26450.0554                                       |
| 420               | 1974.6925                                        | 374               | 5756.7864                                        | 328               | 44366.6180                                       | 282               | 26925.6873                                       |
| 419               | 2087.0400                                        | 373               | 5744.4856                                        | 327               | 43811.4408                                       | 281               | 27735.0817                                       |
| 418               | 2121.4824                                        | 372               | 5718.2438                                        | 326               | 43408.793                                        | 280               | 28680.6051                                       |
| 417               | 2194.4670                                        | 371               | 5744.4856                                        | 325               | 43025.8280                                       | 279               | 29760.6176                                       |
| 416               | 2333.0566                                        | 370               | 5718.2438                                        | 324               | 42635.4818                                       | 278               | 30791.4268                                       |
| 415               | 2367.4989                                        | 369               | 5718.2438                                        | 323               | 42161.4900                                       | 277               | 31727.1096                                       |
| 414               | 2440.4838                                        | 368               | 5718.2438                                        | 322               | 41510.3663                                       | 276               | 32562.7457                                       |
| 413               | 2538.0703                                        | 367               | 5681.3413                                        | 321               | 40564.0228                                       | 275               | 33284.3942                                       |
| 412               | 2623.3560                                        | 366               | 5693.6421                                        | 320               | 39535.6738                                       | 274               | 33974.0605                                       |
| 411               | 2725.0429                                        | 365               | 5718.2438                                        | 319               | 38235.8865                                       | 273               | 34577.6210                                       |
| 410               | 2847.2311                                        | 364               | 5693.6421                                        | 318               | 36726.9852                                       | 272               | 35358.3134                                       |
| 409               | 2932.5168                                        | 363               | 5681.3413                                        | 317               | 35079.4947                                       | 271               | 36181.6486                                       |
| 408               | 3093.2476                                        | 362               | 5693.6421                                        | 316               | 33412.3227                                       | 270               | 37204.2573                                       |
| 407               | 3178.5333                                        | 361               | 5693.6421                                        | 315               | 31814.0355                                       | 269               | 38369.5555                                       |
| 406               | 3313.0223                                        | 360               | 5670.6806                                        | 314               | 30278.0724                                       | 268               | 39687.3840                                       |
| 405               | 3424.5498                                        | 359               | 5766.6270                                        | 313               | 28829.8551                                       | 267               | 41012.5929                                       |
| 404               | 3559.0389                                        | 358               | 5766.6270                                        | 312               | 27565.3303                                       | 266               | 42464.0903                                       |
| 403               | 3670.5663                                        | 357               | 5851.9128                                        | 311               | 26397.5719                                       | 265               | 44015.6345                                       |
| 402               | 3814.8960                                        | 356               | 5974.1010                                        | 310               | 25342.1610                                       | 264               | 45662.3050                                       |
| 401               | 3965.7862                                        | 355               | 6097.9293                                        | 309               | 24312.992                                        | 263               | 47577.1336                                       |
| 400               | 4060.9125                                        | 354               | 6280.8016                                        | 308               | 23282.1828                                       | 262               | 49740.4388                                       |
| 399               | 4221.6433                                        | 353               | 6526.8181                                        | 307               | 22202.1703                                       | 261               | 52190.7632                                       |
| 398               | 4306.9291                                        | 352               | 6845.8195                                        | 306               | 21057.3734                                       | 260               | 54846.1015                                       |
| 397               | 4504.5623                                        | 351               | 7377.2151                                        | 305               | 20016.7236                                       | 259               | 57498.9796                                       |
| 396               | 4565.2464                                        | 350               | 8030.7990                                        | 304               | 18936.7111                                       | 258               | 60168.2587                                       |
| 395               | 4703.8357                                        | 349               | 8368.6617                                        | 303               | 17974.7865                                       | 257               | 62922.8236                                       |
| 394               | 4798.9621                                        | 348               | 9157.5547                                        | 302               | 17118.6490                                       | 256               | 65710.1907                                       |
| 393               | 4933.4511                                        | 347               | 10225.2663                                       | 301               | 16419.1421                                       | 255               | 68438.5139                                       |
| 392               | 5018.7368                                        | 346               | 11488.1511                                       | 300               | 15849.2038                                       | 254               | 71207.8398                                       |
| 391               | 5091.7217                                        | 345               | 13145.4823                                       | 299               | 15508.0609                                       | 253               | 74021.4486                                       |



| $\lambda$<br>[nm] | $\Delta\varepsilon$ [ $M^{-1} \text{cm}^{-1}$ ] | $\lambda$<br>[nm] | $\Delta\varepsilon$ [ $M^{-1} \text{cm}^{-1}$ ] |
|-------------------|-------------------------------------------------|-------------------|-------------------------------------------------|
| 252               | 76849.8185                                      | 206               | 74144.4569                                      |
| 251               | 79592.0825                                      | 205               | 73170.2315                                      |
| 250               | 82371.2491                                      | 204               | 72238.6489                                      |
| 249               | 85048.7288                                      | 203               | 71398.0925                                      |
| 248               | 87886.1193                                      | 202               | 70788.7916                                      |
| 247               | 90692.3476                                      | 201               | 70149.1487                                      |
| 246               | 93537.1186                                      | 200               | 69882.6308                                      |
| 245               | 96599.2041                                      |                   |                                                 |
| 244               | 99709.6729                                      |                   |                                                 |
| 243               | 103026.7956                                     |                   |                                                 |
| 242               | 106655.5392                                     |                   |                                                 |
| 241               | 110549.9806                                     |                   |                                                 |
| 240               | 114384.5580                                     |                   |                                                 |
| 239               | 118617.6821                                     |                   |                                                 |
| 238               | 123041.8791                                     |                   |                                                 |
| 237               | 127341.4277                                     |                   |                                                 |
| 236               | 131222.7482                                     |                   |                                                 |
| 235               | 135017.9630                                     |                   |                                                 |
| 234               | 138330.1653                                     |                   |                                                 |
| 233               | 141261.0420                                     |                   |                                                 |
| 232               | 143129.1274                                     |                   |                                                 |
| 231               | 144265.7237                                     |                   |                                                 |
| 230               | 144419.0740                                     |                   |                                                 |
| 229               | 144317.3872                                     |                   |                                                 |
| 228               | 143157.8294                                     |                   |                                                 |
| 227               | 141225.7797                                     |                   |                                                 |
| 226               | 138807.4373                                     |                   |                                                 |
| 225               | 135928.2241                                     |                   |                                                 |
| 224               | 132375.7456                                     |                   |                                                 |
| 223               | 128352.5556                                     |                   |                                                 |
| 222               | 123829.1319                                     |                   |                                                 |
| 221               | 119347.5311                                     |                   |                                                 |
| 220               | 115005.3396                                     |                   |                                                 |
| 219               | 110463.8748                                     |                   |                                                 |
| 218               | 106188.1078                                     |                   |                                                 |
| 217               | 102153.4370                                     |                   |                                                 |
| 216               | 98239.3142                                      |                   |                                                 |
| 215               | 94575.3083                                      |                   |                                                 |
| 214               | 91224.5634                                      |                   |                                                 |
| 213               | 88094.4133                                      |                   |                                                 |
| 212               | 85305.4060                                      |                   |                                                 |
| 211               | 82891.1640                                      |                   |                                                 |
| 210               | 80599.1101                                      |                   |                                                 |
| 209               | 78577.6745                                      |                   |                                                 |
| 208               | 76839.1578                                      |                   |                                                 |
| 207               | 75365.5188                                      |                   |                                                 |

The UV-Vis spectrum of compound **1** was recorded on a Jasco V-770 spectrophotometer. The wavelength was measured in nm. The solution was measured under air saturated conditions in acetonitrile. The spectrum was recorded using optical 1115F-QS Hellma cuvettes (10 mm light path).

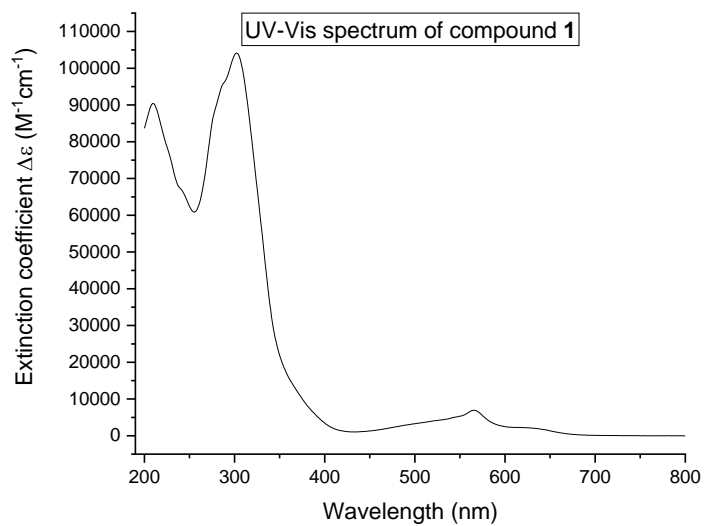

**Figure S15:** UV-Vis spectrum of compound **1**.

**Table S12:** UV-Vis data for compound 1

| Wavelength<br>$\lambda$ [nm] | Extinction coefficient<br>$\Delta\epsilon$ [ $M^{-1}cm^{-1}$ ] | $\lambda$<br>[nm] | $\Delta\epsilon$ [ $M^{-1}$<br>$cm^{-1}$ ] | $\lambda$<br>[nm] | $\Delta\epsilon$ [ $M^{-1}$<br>$cm^{-1}$ ] | $\lambda$<br>[nm] | $\Delta\epsilon$ [ $M^{-1}$<br>$cm^{-1}$ ] |
|------------------------------|----------------------------------------------------------------|-------------------|--------------------------------------------|-------------------|--------------------------------------------|-------------------|--------------------------------------------|
| 800                          | -26.4574                                                       | 755               | 3.412625                                   | 710               | 65.92816                                   | 665               | 663.3109                                   |
| 799                          | -25.0814                                                       | 754               | 18.1451                                    | 709               | 74.35112                                   | 664               | 698.5857                                   |
| 798                          | -26.3043                                                       | 753               | -3.64195                                   | 708               | 73.36165                                   | 663               | 731.3999                                   |
| 797                          | -16.0478                                                       | 752               | 6.278621                                   | 707               | 90.14079                                   | 662               | 769.6306                                   |
| 796                          | 2.91433                                                        | 751               | 7.110329                                   | 706               | 96.84158                                   | 661               | 811.7446                                   |
| 795                          | -11.2044                                                       | 750               | 0.893387                                   | 705               | 93.84598                                   | 660               | 847.0939                                   |
| 794                          | -4.60728                                                       | 749               | 15.65123                                   | 704               | 97.42146                                   | 659               | 894.0154                                   |
| 793                          | -6.41298                                                       | 748               | 9.385055                                   | 703               | 94.43528                                   | 658               | 933.5789                                   |
| 792                          | -20.4771                                                       | 747               | 9.621734                                   | 702               | 95.08576                                   | 657               | 977.3002                                   |
| 791                          | -11.0752                                                       | 746               | 13.59087                                   | 701               | 107.4241                                   | 656               | 1030.227                                   |
| 790                          | -16.267                                                        | 745               | 10.66038                                   | 700               | 109.3625                                   | 655               | 1081.746                                   |
| 789                          | -18.1543                                                       | 744               | 11.3772                                    | 699               | 110.6543                                   | 654               | 1140.706                                   |
| 788                          | -21.7893                                                       | 743               | 14.32197                                   | 698               | 117.0383                                   | 653               | 1185.526                                   |
| 787                          | -17.1119                                                       | 742               | 20.83243                                   | 697               | 114.8166                                   | 652               | 1239.916                                   |
| 786                          | -12.9394                                                       | 741               | 12.41767                                   | 696               | 116.3414                                   | 651               | 1291.109                                   |
| 785                          | -13.8813                                                       | 740               | 35.17847                                   | 695               | 117.9285                                   | 650               | 1340.369                                   |
| 784                          | -4.555                                                         | 739               | 28.71058                                   | 694               | 118.0769                                   | 649               | 1395.276                                   |
| 783                          | -3.28811                                                       | 738               | 32.66352                                   | 693               | 124.1879                                   | 648               | 1447.904                                   |
| 782                          | 8.556238                                                       | 737               | 45.54457                                   | 692               | 139.6457                                   | 647               | 1503.228                                   |
| 781                          | 14.0331                                                        | 736               | 40.99197                                   | 691               | 152.7792                                   | 646               | 1553.383                                   |
| 780                          | 5.509954                                                       | 735               | 33.37415                                   | 690               | 173.1029                                   | 645               | 1604.456                                   |
| 779                          | 0.464773                                                       | 734               | 35.3598                                    | 689               | 184.4344                                   | 644               | 1645.083                                   |
| 778                          | -15.848                                                        | 733               | 26.89324                                   | 688               | 189.9146                                   | 643               | 1682.659                                   |
| 777                          | -10.4971                                                       | 732               | 34.57986                                   | 687               | 201.9543                                   | 642               | 1722.513                                   |
| 776                          | -4.86724                                                       | 731               | 26.34628                                   | 686               | 210.6084                                   | 641               | 1755.277                                   |
| 775                          | -10.7333                                                       | 730               | 21.66426                                   | 685               | 221.788                                    | 640               | 1793.024                                   |
| 774                          | -9.17705                                                       | 729               | 20.91697                                   | 684               | 235.4526                                   | 639               | 1833.11                                    |
| 773                          | -21.4213                                                       | 728               | 19.02435                                   | 683               | 239.941                                    | 638               | 1867.233                                   |
| 772                          | -20.8634                                                       | 727               | 38.97127                                   | 682               | 246.9171                                   | 637               | 1910.808                                   |
| 771                          | -9.80198                                                       | 726               | 49.31061                                   | 681               | 266.5474                                   | 636               | 1946.527                                   |
| 770                          | 0.533917                                                       | 725               | 56.40832                                   | 680               | 275.4496                                   | 635               | 1972.805                                   |
| 769                          | 9.782258                                                       | 724               | 53.0347                                    | 679               | 289.5676                                   | 634               | 2004.86                                    |
| 768                          | 6.223819                                                       | 723               | 55.97787                                   | 678               | 317.2244                                   | 633               | 2025.145                                   |
| 767                          | 3.785546                                                       | 722               | 51.18831                                   | 677               | 326.687                                    | 632               | 2045.823                                   |
| 766                          | 2.088633                                                       | 721               | 43.83246                                   | 676               | 351.2945                                   | 631               | 2072.656                                   |
| 765                          | 3.415407                                                       | 720               | 48.24306                                   | 675               | 373.688                                    | 630               | 2088.542                                   |
| 764                          | 8.37243                                                        | 719               | 47.81309                                   | 674               | 395.2923                                   | 629               | 2106.885                                   |
| 763                          | 5.471269                                                       | 718               | 56.81656                                   | 673               | 427.4348                                   | 628               | 2124.204                                   |
| 762                          | 4.48875                                                        | 717               | 61.22031                                   | 672               | 456.0116                                   | 627               | 2142.354                                   |
| 761                          | -6.08725                                                       | 716               | 69.28873                                   | 671               | 484.4003                                   | 626               | 2156.213                                   |
| 760                          | -13.7537                                                       | 715               | 69.60957                                   | 670               | 503.7416                                   | 625               | 2173.039                                   |
| 759                          | -15.7313                                                       | 714               | 74.20042                                   | 669               | 523.7362                                   | 624               | 2188.857                                   |
| 758                          | -28.3318                                                       | 713               | 77.58419                                   | 668               | 552.3626                                   | 623               | 2192.75                                    |
| 757                          | -10.2826                                                       | 712               | 83.11194                                   | 667               | 585.3304                                   | 622               | 2199.844                                   |
| 756                          | -2.72054                                                       | 711               | 76.3868                                    | 666               | 624.0671                                   | 621               | 2206.67                                    |

| $\lambda$<br>[nm] | $\Delta\varepsilon$ [ $M^{-1}$<br>$cm^{-1}$ ] | $\lambda$<br>[nm] | $\Delta\varepsilon$ [ $M^{-1}$<br>$cm^{-1}$ ] | $\lambda$<br>[nm] | $\Delta\varepsilon$ [ $M^{-1}$<br>$cm^{-1}$ ] | $\lambda$<br>[nm] | $\Delta\varepsilon$ [ $M^{-1}$<br>$cm^{-1}$ ] |
|-------------------|-----------------------------------------------|-------------------|-----------------------------------------------|-------------------|-----------------------------------------------|-------------------|-----------------------------------------------|
| 620               | 2204.511                                      | 574               | 5725.733                                      | 528               | 4261.977                                      | 482               | 2567.492                                      |
| 619               | 2216.055                                      | 573               | 5955.05                                       | 527               | 4237.247                                      | 481               | 2520.12                                       |
| 618               | 2230.371                                      | 572               | 6168.453                                      | 526               | 4207.35                                       | 480               | 2473.739                                      |
| 617               | 2236.502                                      | 571               | 6367.201                                      | 525               | 4181.937                                      | 479               | 2432.742                                      |
| 616               | 2246.509                                      | 570               | 6533.913                                      | 524               | 4146.008                                      | 478               | 2386.034                                      |
| 615               | 2251.691                                      | 569               | 6686.476                                      | 523               | 4118.485                                      | 477               | 2333.903                                      |
| 614               | 2258.563                                      | 568               | 6807.055                                      | 522               | 4102.452                                      | 476               | 2289.509                                      |
| 613               | 2262.365                                      | 567               | 6887.283                                      | 521               | 4057.504                                      | 475               | 2245.294                                      |
| 612               | 2260.322                                      | 566               | 6932.654                                      | 520               | 4024.226                                      | 474               | 2193.964                                      |
| 611               | 2268.801                                      | 565               | 6936.215                                      | 519               | 3980.251                                      | 473               | 2156.464                                      |
| 610               | 2264.689                                      | 564               | 6891.753                                      | 518               | 3944.34                                       | 472               | 2114.451                                      |
| 609               | 2274.617                                      | 563               | 6815.79                                       | 517               | 3910.468                                      | 471               | 2061.611                                      |
| 608               | 2287.129                                      | 562               | 6707.547                                      | 516               | 3868.659                                      | 470               | 2026.381                                      |
| 607               | 2299.693                                      | 561               | 6572.331                                      | 515               | 3827.876                                      | 469               | 1987.936                                      |
| 606               | 2325.499                                      | 560               | 6430.652                                      | 514               | 3777.256                                      | 468               | 1939.962                                      |
| 605               | 2341.156                                      | 559               | 6275.212                                      | 513               | 3730.661                                      | 467               | 1901.225                                      |
| 604               | 2362.353                                      | 558               | 6117.265                                      | 512               | 3694.577                                      | 466               | 1849.136                                      |
| 603               | 2382.165                                      | 557               | 5963.482                                      | 511               | 3656.642                                      | 465               | 1806.944                                      |
| 602               | 2410.94                                       | 556               | 5828.358                                      | 510               | 3622.565                                      | 464               | 1771.02                                       |
| 601               | 2444.581                                      | 555               | 5708.39                                       | 509               | 3592.027                                      | 463               | 1735.579                                      |
| 600               | 2484.123                                      | 554               | 5598.881                                      | 508               | 3562.524                                      | 462               | 1700.85                                       |
| 599               | 2527.981                                      | 553               | 5506.302                                      | 507               | 3525.531                                      | 461               | 1658.375                                      |
| 598               | 2571.475                                      | 552               | 5428.627                                      | 506               | 3485.669                                      | 460               | 1623.261                                      |
| 597               | 2617.106                                      | 551               | 5368.256                                      | 505               | 3442.188                                      | 459               | 1581.226                                      |
| 596               | 2666.864                                      | 550               | 5319.007                                      | 504               | 3406.362                                      | 458               | 1544.877                                      |
| 595               | 2726.826                                      | 549               | 5274.897                                      | 503               | 3371.04                                       | 457               | 1507.857                                      |
| 594               | 2783.68                                       | 548               | 5221.537                                      | 502               | 3336.63                                       | 456               | 1467.239                                      |
| 593               | 2852.064                                      | 547               | 5169.132                                      | 501               | 3302.211                                      | 455               | 1443.316                                      |
| 592               | 2923.026                                      | 546               | 5120.417                                      | 500               | 3267.169                                      | 454               | 1407.95                                       |
| 591               | 3000.644                                      | 545               | 5072.521                                      | 499               | 3244.745                                      | 453               | 1378.358                                      |
| 590               | 3090.959                                      | 544               | 5028.151                                      | 498               | 3211.033                                      | 452               | 1345.868                                      |
| 589               | 3188.235                                      | 543               | 4979.494                                      | 497               | 3173.243                                      | 451               | 1312.009                                      |
| 588               | 3291.395                                      | 542               | 4917.895                                      | 496               | 3137.075                                      | 450               | 1306.558                                      |
| 587               | 3396.001                                      | 541               | 4862.022                                      | 495               | 3095.416                                      | 449               | 1286.104                                      |
| 586               | 3511.743                                      | 540               | 4801.881                                      | 494               | 3051.813                                      | 448               | 1263.933                                      |
| 585               | 3641.147                                      | 539               | 4736.543                                      | 493               | 3017.48                                       | 447               | 1240.089                                      |
| 584               | 3773.702                                      | 538               | 4680.227                                      | 492               | 2982.929                                      | 446               | 1216.599                                      |
| 583               | 3923.118                                      | 537               | 4621.27                                       | 491               | 2950.128                                      | 445               | 1185.416                                      |
| 582               | 4081.868                                      | 536               | 4562.041                                      | 490               | 2921.615                                      | 444               | 1157.416                                      |
| 581               | 4247.229                                      | 535               | 4514.334                                      | 489               | 2881.206                                      | 443               | 1147.008                                      |
| 580               | 4434.999                                      | 534               | 4475.34                                       | 488               | 2833.455                                      | 442               | 1137.525                                      |
| 579               | 4629.638                                      | 533               | 4431.12                                       | 487               | 2788.044                                      | 441               | 1131.29                                       |
| 578               | 4839.874                                      | 532               | 4396.832                                      | 486               | 2744.6                                        | 440               | 1124.049                                      |
| 577               | 5048.326                                      | 531               | 4358.183                                      | 485               | 2700.614                                      | 439               | 1094.286                                      |
| 576               | 5266.655                                      | 530               | 4315.093                                      | 484               | 2659.653                                      | 438               | 1070.749                                      |
| 575               | 5493.93                                       | 529               | 4287.233                                      | 483               | 2608.969                                      | 437               | 1063.099                                      |

| $\lambda$<br>[nm] | $\Delta\varepsilon$ [ $M^{-1}$<br>$cm^{-1}$ ] | $\lambda$<br>[nm] | $\Delta\varepsilon$ [ $M^{-1}$<br>$cm^{-1}$ ] | $\lambda$<br>[nm] | $\Delta\varepsilon$ [ $M^{-1}$<br>$cm^{-1}$ ] | $\lambda$<br>[nm] | $\Delta\varepsilon$ [ $M^{-1}$<br>$cm^{-1}$ ] |
|-------------------|-----------------------------------------------|-------------------|-----------------------------------------------|-------------------|-----------------------------------------------|-------------------|-----------------------------------------------|
| 436               | 1043.882                                      | 390               | 5670.963                                      | 344               | 27933.69                                      | 298               | 102494.4                                      |
| 435               | 1042.238                                      | 389               | 5924.302                                      | 343               | 29256.96                                      | 297               | 101750.4                                      |
| 434               | 1047.454                                      | 388               | 6170.114                                      | 342               | 30672.8                                       | 296               | 100943.4                                      |
| 433               | 1037.262                                      | 387               | 6439.647                                      | 341               | 32280.1                                       | 295               | 100113.2                                      |
| 432               | 1041.997                                      | 386               | 6684.605                                      | 340               | 34246.22                                      | 294               | 99268.48                                      |
| 431               | 1043.728                                      | 385               | 6949.174                                      | 339               | 36088.56                                      | 293               | 98483.49                                      |
| 430               | 1045.602                                      | 384               | 7228.812                                      | 338               | 38047.75                                      | 292               | 97760.54                                      |
| 429               | 1059.36                                       | 383               | 7485.084                                      | 337               | 40159.29                                      | 291               | 97164.15                                      |
| 428               | 1073.902                                      | 382               | 7797.029                                      | 336               | 42335.67                                      | 290               | 96693.1                                       |
| 427               | 1084.184                                      | 381               | 8084.745                                      | 335               | 44586.88                                      | 289               | 96325.24                                      |
| 426               | 1103.343                                      | 380               | 8390.287                                      | 334               | 46907.66                                      | 288               | 96017.76                                      |
| 425               | 1121.037                                      | 379               | 8714.716                                      | 333               | 49253.95                                      | 287               | 95668.08                                      |
| 424               | 1138.346                                      | 378               | 9013.734                                      | 332               | 51564.71                                      | 286               | 95193.02                                      |
| 423               | 1174.942                                      | 377               | 9355.275                                      | 331               | 53863.55                                      | 285               | 94555.58                                      |
| 422               | 1212.688                                      | 376               | 9708.354                                      | 330               | 56167.79                                      | 284               | 93745.3                                       |
| 421               | 1257.456                                      | 375               | 10066.69                                      | 329               | 58407.32                                      | 283               | 92829.24                                      |
| 420               | 1305.66                                       | 374               | 10433.73                                      | 328               | 60675.64                                      | 282               | 91866.52                                      |
| 419               | 1340.129                                      | 373               | 10784.57                                      | 327               | 62896.49                                      | 281               | 90948                                         |
| 418               | 1375.421                                      | 372               | 11153.06                                      | 326               | 65099.26                                      | 280               | 90093.41                                      |
| 417               | 1425.922                                      | 371               | 11519.65                                      | 325               | 67321.52                                      | 279               | 89299.05                                      |
| 416               | 1481.517                                      | 370               | 11883.09                                      | 324               | 69542.44                                      | 278               | 88490.77                                      |
| 415               | 1555.087                                      | 369               | 12255.23                                      | 323               | 71784.31                                      | 277               | 87557.14                                      |
| 414               | 1634.363                                      | 368               | 12634.3                                       | 322               | 74006.02                                      | 276               | 86439.32                                      |
| 413               | 1702.068                                      | 367               | 13039.63                                      | 321               | 76240.05                                      | 275               | 85077.91                                      |
| 412               | 1778.332                                      | 366               | 13413.32                                      | 320               | 78455.11                                      | 274               | 83480.44                                      |
| 411               | 1873.145                                      | 365               | 13796.97                                      | 319               | 80687.26                                      | 273               | 81692.41                                      |
| 410               | 2009.071                                      | 364               | 14199.91                                      | 318               | 82904.22                                      | 272               | 79802.52                                      |
| 409               | 2110.079                                      | 363               | 14580.54                                      | 317               | 85064.88                                      | 271               | 77844.87                                      |
| 408               | 2224.98                                       | 362               | 14985.18                                      | 316               | 87163.84                                      | 270               | 75936.18                                      |
| 407               | 2348.888                                      | 361               | 15407.95                                      | 315               | 89188.91                                      | 269               | 74088.88                                      |
| 406               | 2478.893                                      | 360               | 15838.1                                       | 314               | 91144.38                                      | 268               | 72315.88                                      |
| 405               | 2617.681                                      | 359               | 16321.1                                       | 313               | 93007.3                                       | 267               | 70660.98                                      |
| 404               | 2756.609                                      | 358               | 16836.26                                      | 312               | 94793.13                                      | 266               | 69112.01                                      |
| 403               | 2900.313                                      | 357               | 17358.39                                      | 311               | 96493.85                                      | 265               | 67682.44                                      |
| 402               | 3077.233                                      | 356               | 17925.3                                       | 310               | 98039.63                                      | 264               | 66381.88                                      |
| 401               | 3257.398                                      | 355               | 18492.57                                      | 309               | 99442.45                                      | 263               | 65218.47                                      |
| 400               | 3443.893                                      | 354               | 19087.87                                      | 308               | 100710.3                                      | 262               | 64172.8                                       |
| 399               | 3647.975                                      | 353               | 19728.38                                      | 307               | 101765.9                                      | 261               | 63261.6                                       |
| 398               | 3842.007                                      | 352               | 20394.37                                      | 306               | 102648.7                                      | 260               | 62499.02                                      |
| 397               | 4047.437                                      | 351               | 21107.09                                      | 305               | 103344.8                                      | 259               | 61882.52                                      |
| 396               | 4267.025                                      | 350               | 21874.12                                      | 304               | 103819.8                                      | 258               | 61400.66                                      |
| 395               | 4482.205                                      | 349               | 22698.93                                      | 303               | 104076.3                                      | 257               | 61083.91                                      |
| 394               | 4702.813                                      | 348               | 23606.53                                      | 302               | 104123.6                                      | 256               | 60899.6                                       |
| 393               | 4939.265                                      | 347               | 24567.55                                      | 301               | 103964.3                                      | 255               | 60855.98                                      |
| 392               | 5167.821                                      | 346               | 25619.76                                      | 300               | 103627.3                                      | 254               | 60972.89                                      |
| 391               | 5414.556                                      | 345               | 26723.55                                      | 299               | 103113                                        | 253               | 61195.38                                      |

| $\lambda$<br>[nm] | $\Delta\varepsilon$ [ $M^{-1}$<br>$cm^{-1}$ ] | $\lambda$<br>[nm] | $\Delta\varepsilon$ [ $M^{-1}$<br>$cm^{-1}$ ] |
|-------------------|-----------------------------------------------|-------------------|-----------------------------------------------|
| 252               | 61525.43                                      | 206               | 88946.29                                      |
| 251               | 61965.02                                      | 205               | 88139.63                                      |
| 250               | 62444.33                                      | 204               | 87251.4                                       |
| 249               | 62984.67                                      | 203               | 86296.12                                      |
| 248               | 63563.58                                      | 202               | 85350.02                                      |
| 247               | 64130.15                                      | 201               | 84471.12                                      |
| 246               | 64706.5                                       | 200               | 83665.39                                      |
| 245               | 65275.58                                      |                   |                                               |
| 244               | 65792.69                                      |                   |                                               |
| 243               | 66249.11                                      |                   |                                               |
| 242               | 66647.23                                      |                   |                                               |
| 241               | 66954.11                                      |                   |                                               |
| 240               | 67219.8                                       |                   |                                               |
| 239               | 67480                                         |                   |                                               |
| 238               | 67797.55                                      |                   |                                               |
| 237               | 68221.89                                      |                   |                                               |
| 236               | 68794.43                                      |                   |                                               |
| 235               | 69516.63                                      |                   |                                               |
| 234               | 70353.96                                      |                   |                                               |
| 233               | 71310.3                                       |                   |                                               |
| 232               | 72337.43                                      |                   |                                               |
| 231               | 73386.11                                      |                   |                                               |
| 230               | 74416.98                                      |                   |                                               |
| 229               | 75394.29                                      |                   |                                               |
| 228               | 76285.41                                      |                   |                                               |
| 227               | 77114.98                                      |                   |                                               |
| 226               | 77886.82                                      |                   |                                               |
| 225               | 78641.92                                      |                   |                                               |
| 224               | 79399.54                                      |                   |                                               |
| 223               | 80183.02                                      |                   |                                               |
| 222               | 81030.56                                      |                   |                                               |
| 221               | 81917.7                                       |                   |                                               |
| 220               | 82872.94                                      |                   |                                               |
| 219               | 83852.28                                      |                   |                                               |
| 218               | 84843.87                                      |                   |                                               |
| 217               | 85824.17                                      |                   |                                               |
| 216               | 86756.93                                      |                   |                                               |
| 215               | 87663.75                                      |                   |                                               |
| 214               | 88484.58                                      |                   |                                               |
| 213               | 89203.66                                      |                   |                                               |
| 212               | 89801.52                                      |                   |                                               |
| 211               | 90210.93                                      |                   |                                               |
| 210               | 90401.2                                       |                   |                                               |
| 209               | 90375.73                                      |                   |                                               |
| 208               | 90108.16                                      |                   |                                               |
| 207               | 89614.11                                      |                   |                                               |

The combined UV-Vis spectra of compound **1** and **8** can be found in figure S16. Furthermore, the absorption maxima for both compounds are summarized in table S13. It can be seen that the metal-to-ligand charge transfer (MLCT) absorption is in the same range for both complexes. Only a small bathochromic shift for the cage compound **1** of 3 nm is observed. The intensity of the MLCT band is slightly decreased upon macrocyclization. These minuscule spectral changes indicate that the surrounding ring system does not distort the coordination geometry at the metal center and is only weakly coupled to the complex' tpy ligand system. A bigger difference can be observed for the ligand-centered (LC) transitions. For the aldehyde complex **8** a weak transition at 332 nm is observed, whereas we observe a much more intense transition for the complex **1** at 302 nm. This intense transition is attributed to the macrocycle formed upon interlinking the ligands in **1** resulting in a large delocalized  $\pi$ -system.

**Table S13:** Absorption maxima for compound **1** and compound **8**

| Compound <b>1</b>                |                                                                | Compound <b>8</b>                |                                                                |
|----------------------------------|----------------------------------------------------------------|----------------------------------|----------------------------------------------------------------|
| Wavelength $\lambda_{\max}$ [nm] | Extinction coefficient $\Delta\varepsilon$ [ $M^{-1}cm^{-1}$ ] | Wavelength $\lambda_{\max}$ [nm] | Extinction coefficient $\Delta\varepsilon$ [ $M^{-1}cm^{-1}$ ] |
| 210                              | 90401                                                          | 233                              | 144419                                                         |
| 302                              | 104124                                                         | 332                              | 46878                                                          |
| 565                              | 6936                                                           | 562                              | 10253                                                          |

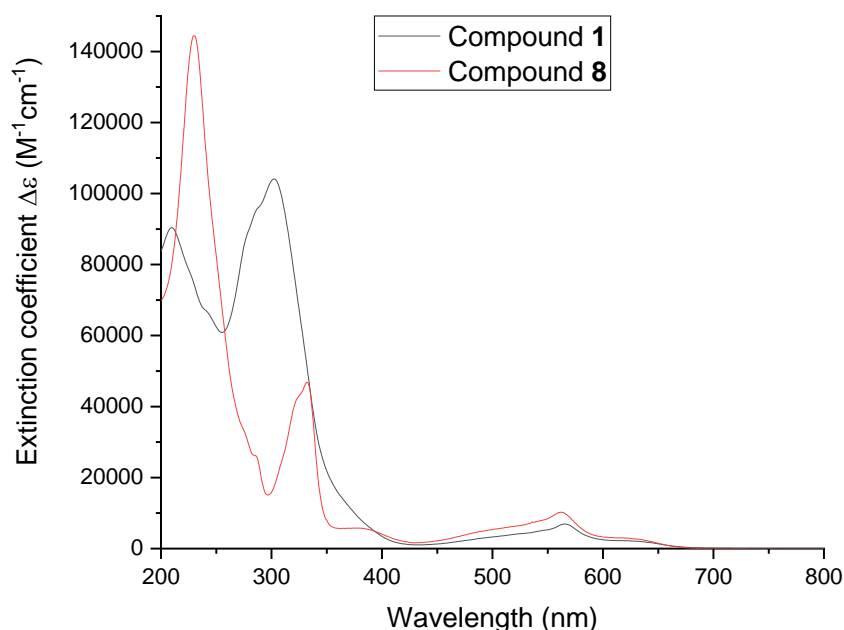

**Figure S16:** Combined UV-Vis spectrum of compound **1** and compound **8**.

**Fluorescence spectra** of the complexes **1** and **8** were recorded in degassed acetonitrile at room temperature using quartz fluorescence cuvettes with a 1 cm optical path length on a Horiba Jobin–Yvon FluoroMax 4 fluorimeter. However, no emission of the complexes was observed under these conditions.

### Crystal Data of **8** and Unsuccessful Crystallization Attempts of **1**

Single crystals of compound **8** were grown by vapor diffusion technique with acetonitrile as solvent and diethyl ether as anti-solvent. Solid state structure of complex **8** with rotation ellipsoids at 50% probability are displayed. Hydrogen atoms, solvent molecules and the  $\text{PF}_6^-$  counter ions were omitted for clarity. Color code: N: blue, Fe: orange, O: red and C: gray.

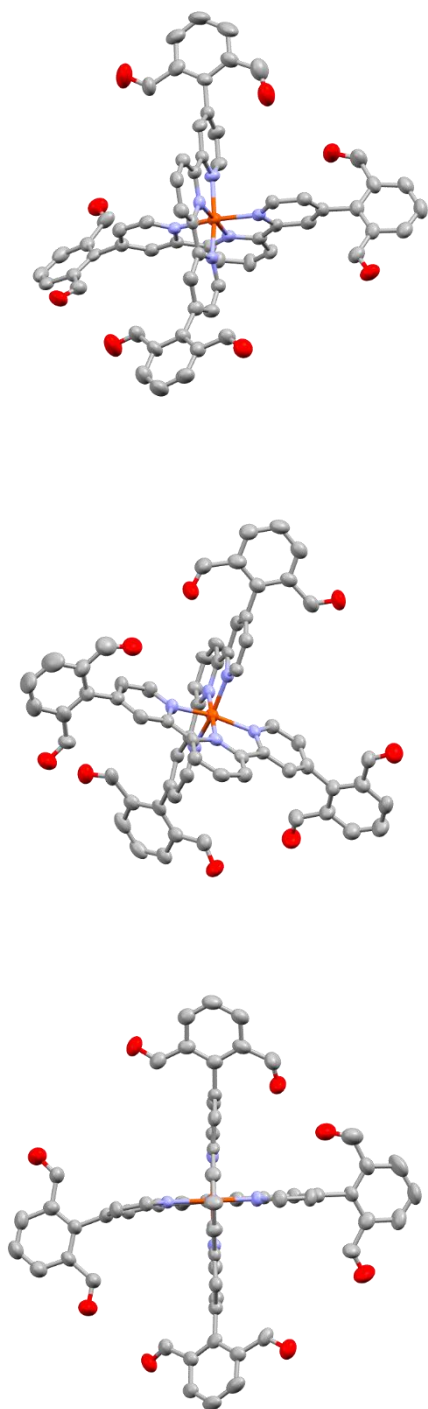

**Figure S17:** Solid state structure of the **1** with rotation ellipsoids at 50% probability. Three different illustrations are presented. Hydrogen atoms, solvent molecules and the  $\text{PF}_6^-$  counter ions are omitted for clarity. Color code: Fe: orange, N: blue, O: red, C: gray.



Crystal data for compound **8**: formula  $C_{70}H_{50}F_{12}FeN_{10}O_8P_2$ ,  $M = 1504.99$ ,  $F(000) = 3072$ , purple plate, size  $0.03 \times 0.16 \times 0.18 \text{ mm}^3$ , space group  $P 21/c$ ,  $Z = 4$ ,  $a = 16.5679(10) \text{ \AA}$ ,  $b = 33.819(2) \text{ \AA}$ ,  $c = 12.1822(6) \text{ \AA}$ ,  $\alpha = 90^\circ$ ,  $\beta = 105.135(4)^\circ$ ,  $\gamma = 90^\circ$ ,  $V = 6589.0(7) \text{ \AA}^3$ ,  $D_{\text{calc.}} = 1.517 \text{ Mg} \cdot \text{m}^{-3}$ . The crystal was measured on a Bruker APEX-II CCD diffractometer at 130K using graphite-monochromated  $\text{CuK}\alpha$ -radiation with  $\lambda = 1.54178 \text{ \AA}$ ,  $\Theta_{\text{max}} = 70.216^\circ$ . Minimal/maximal transmission 0.6021/0.7533,  $\mu = 3.170 \text{ mm}^{-1}$ . The Apex2 suite has been used for data collection and integration. From a total of 46856 reflections, 11902 were independent (merging  $r = 0.1077$ ). From these, 11902 were considered as observed ( $I > 2\sigma(I)$ ) and were used to refine 900 parameters. The structure was solved by dual methods using the program SHELXT 2014/5. Least-squares refinement against  $F_{\text{sqd}}$  was carried out on all non-hydrogen atoms using the program ShelXL.  $R = 0.1246$  (observed data),  $wR = 0.3881$  (all data),  $\text{GOF} = 1.091$ . Minimal/maximal residual electron density =  $-1.123/1.513 \text{ e \AA}^{-3}$ . Chebychev polynomial weights were used to complete the refinement. Plots were produced using Olex2. Crystallographic data (excluding structure factors) for the structure in this paper have been deposited with the Cambridge Crystallographic Data Center, the deposition number is (1957472). Copies of the data can be obtained, free of charge, on application to the CCDC, 12 Union Road, Cambridge CB2 1EZ, UK [fax: +44-1223-336033 or e-mail: [deposit@ccdc.cam.ac.uk](mailto:deposit@ccdc.cam.ac.uk)].

**Crystallization Attempts of 1:** In spite of numerous attempts, crystals suitable for x-ray diffraction analysis of complex **1** could not be obtained. Based on our experience with  $\text{Fe(II)tpy}_2$  model complexes, crystallization attempts of **1** were based on both, vapor diffusion and the solvent layering techniques. In particular the following combinations were investigated repeatedly without success. Solutions of **1** in acetonitrile, acetone, methanol, and dichloromethane were exposed to the “anti-solvents” diethyl ether, diisopropyl ether, heptane, hexane, petroleum ether, water, toluene, tetrahydrofuran, cyclohexane, and isopropanol. Also to vary the initial concentration of **1** in the solvents did not result in crystals of the required quality.

## SQUID Measurements

The magnetic measurements were performed on a SQUID magnetometer (Quantum design, model MPMS-XL-5). For standard measurements, the temperature dependent magnetization was recorded at  $B=0.1$  Tesla as external magnetic field. The temperature was swept in the range of 5 – 365 K at the rate  $3 \text{ K min}^{-1}$ . Gelatine capsules were used as sample holders. The diamagnetic corrections of the molar magnetic susceptibilities were applied using Pascal's constants. From these measurements, we can infer that these compounds (**9**, **8** and **1**) showed structurally low-spin state as the high-spin molecules show  $XT$  value around  $3.5 \text{ emu mol}^{-1} \text{ K}$ .<sup>5</sup> Therefore, we concluded that all the compounds were diamagnetic and no SCO behavior was observed upon heating.

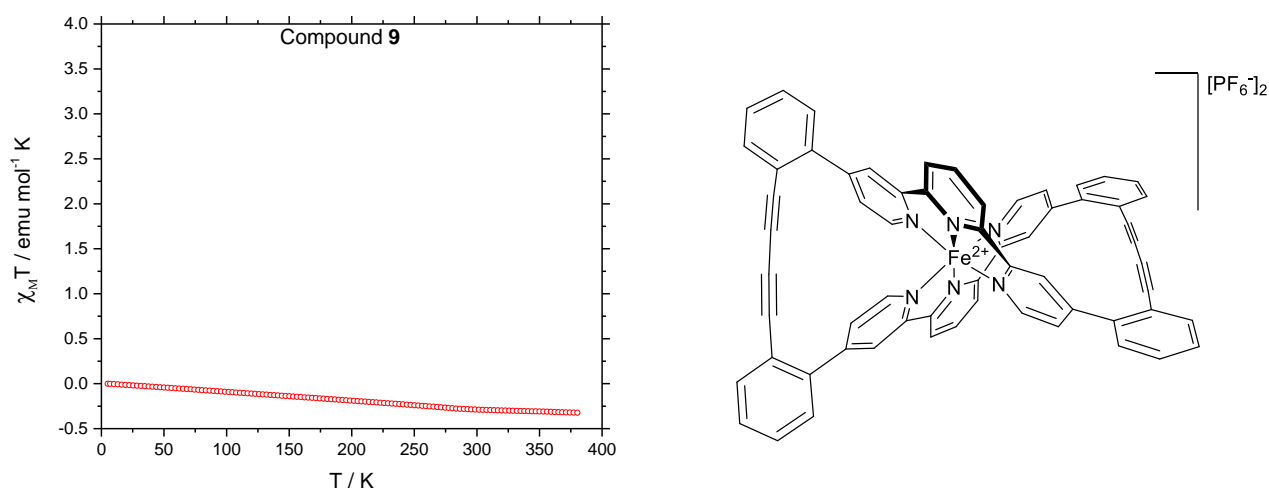

Figure S18: SQUID measurement of compound **9** (left) and the corresponding structure (right).

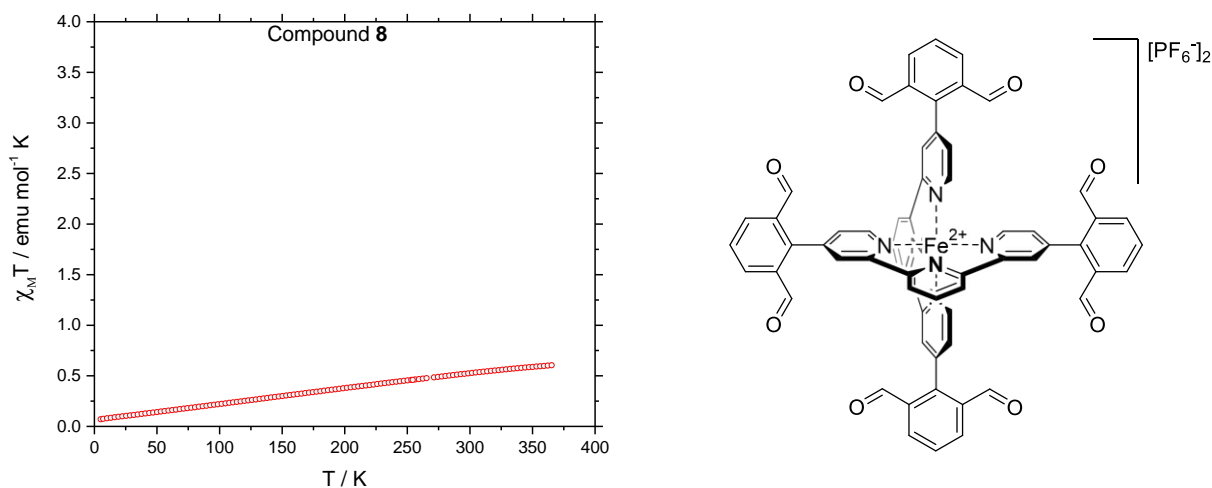

Figure S19: SQUID measurement of compound **8** (left) and the corresponding structure (right).

<sup>5</sup> Brooker, *Chem. Soc. Rev.*, **2015**, 44, 2880-2892.

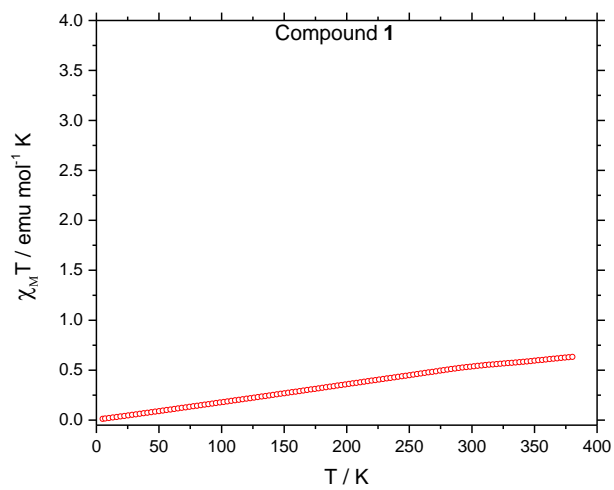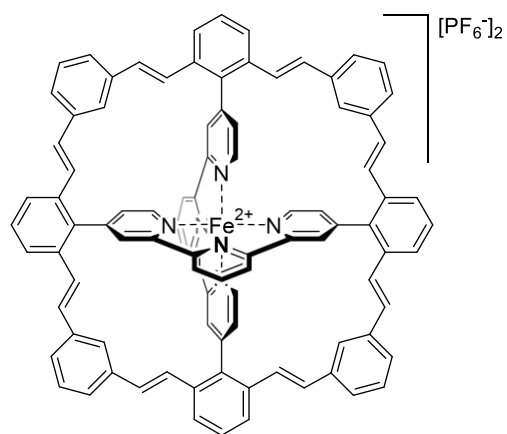

**Figure S110:** SQUID measurement of compound **1** (left) and the corresponding structure (right).

## IR-Spectra

Infrared spectra were measured with a Bruker Platinum ATR Alpha in the region of 900-200  $\text{cm}^{-1}$ . The spectra were recorded at room temperature with 150 scans and with a resolution of 2.0  $\text{cm}^{-1}$ . The idea was to identify the Fe-N vibration to confirm the increasing stiffness upon interlinking of the structures. Unfortunately, the vibration could not be identified.

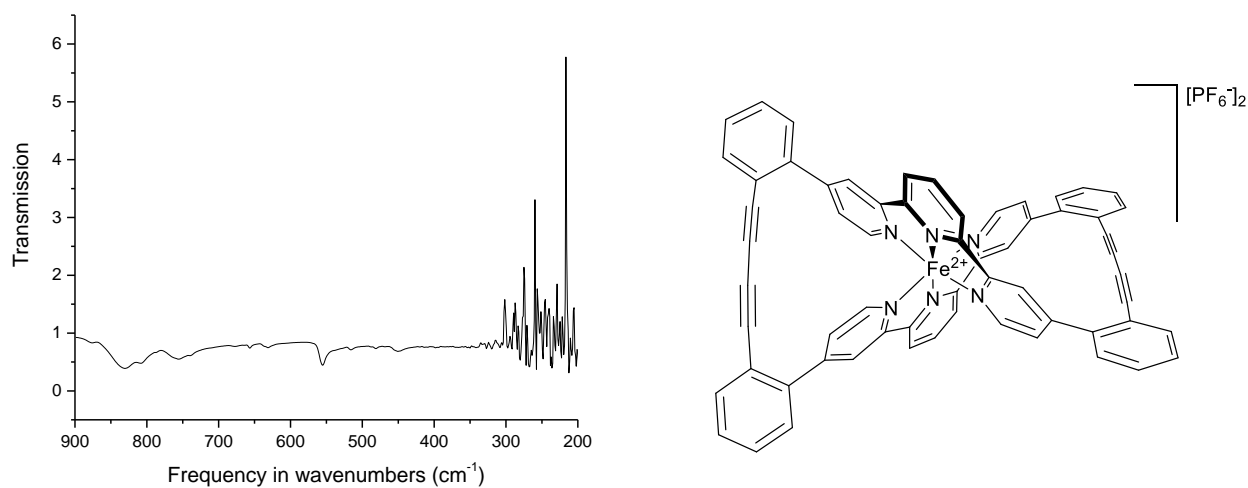

**Figure S11:** IR-spectrum of compound **9** (left) and corresponding structure (right).

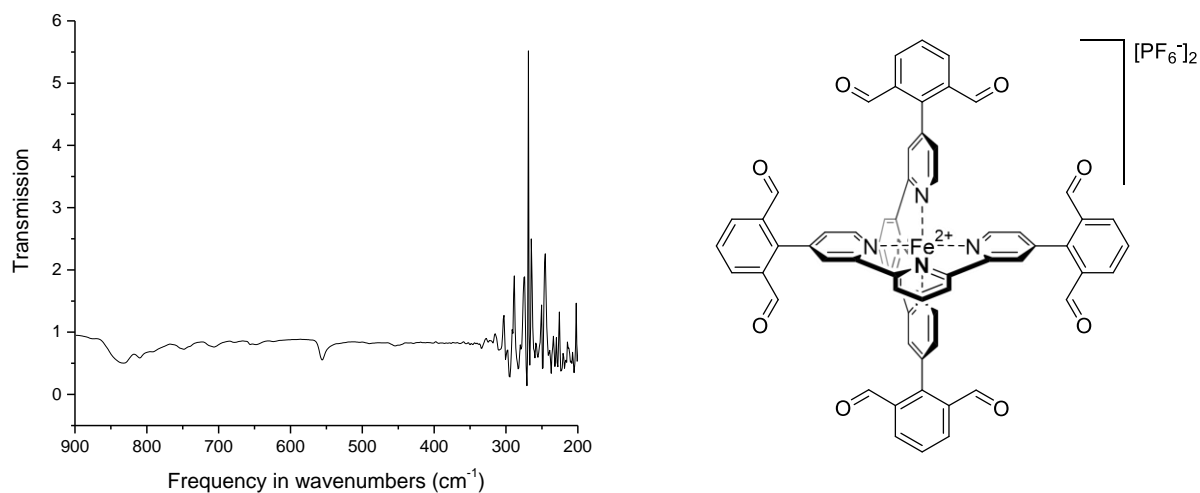

**Figure S12:** IR-spectrum of compound **8** (left) and corresponding structure (right).

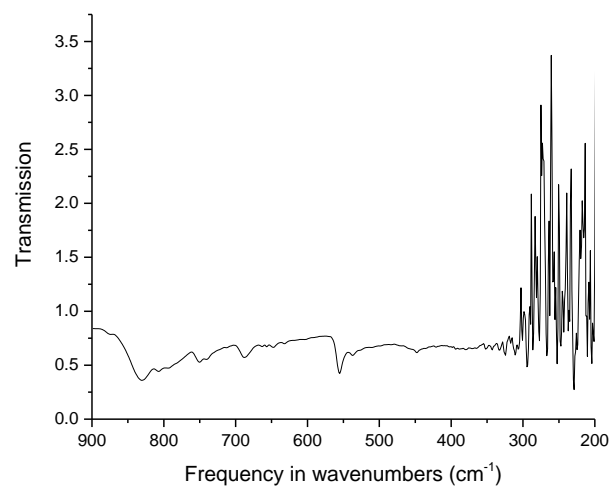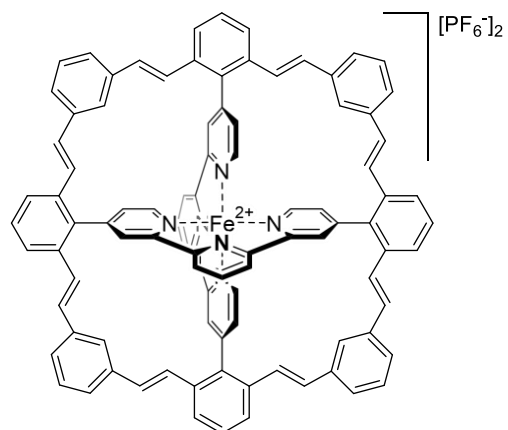

**Figure SI13:** IR-spectrum of compound **1** (left) and corresponding structure (right).

## Determination of the Spin-Spin Relaxation Times $T_2$ of Compound **8** and all-*trans* Isomer **1** by NMR Spectroscopy

The structures of **1** and **8** (illustrated in figure S114) suggest an increased rigidity of the macrocyclized complex **1** compared to that of **8** as the isophthalaldehyde groups can freely rotate, which induces motion and flexibility all over the molecule. In order to gain insight into the dynamic behaviour of all-*trans* **1** and **8** we determined the spin-spin relaxation time  $T_2$  for all protons in **1** and **8** using a *Carr-Purcell-Meiboom-Gill* (CPMG) spin echo pulse sequence. An increase in  $T_2$  time at constant molecular weight is a very sensitive probe for the intramolecular mobility of a spin. The protons in the following figures and tables are assigned according to figure S114.

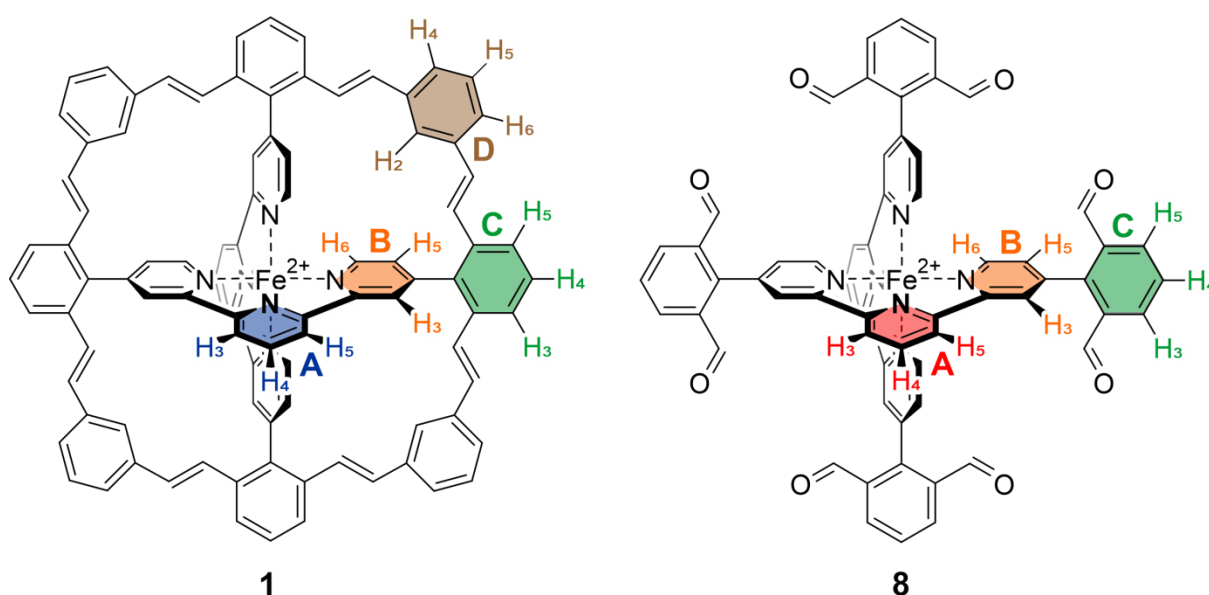

**Figure S114:** Proton assignment for the complexes **1** and **8**.

The comparison for complex **1** and for complex **8** of the measured  $T_2$  relaxation times is depicted in table S14. A representative plot of the relaxation times for the proton A:  $H_3/H_5$  of both complexes is illustrated in figure S115.

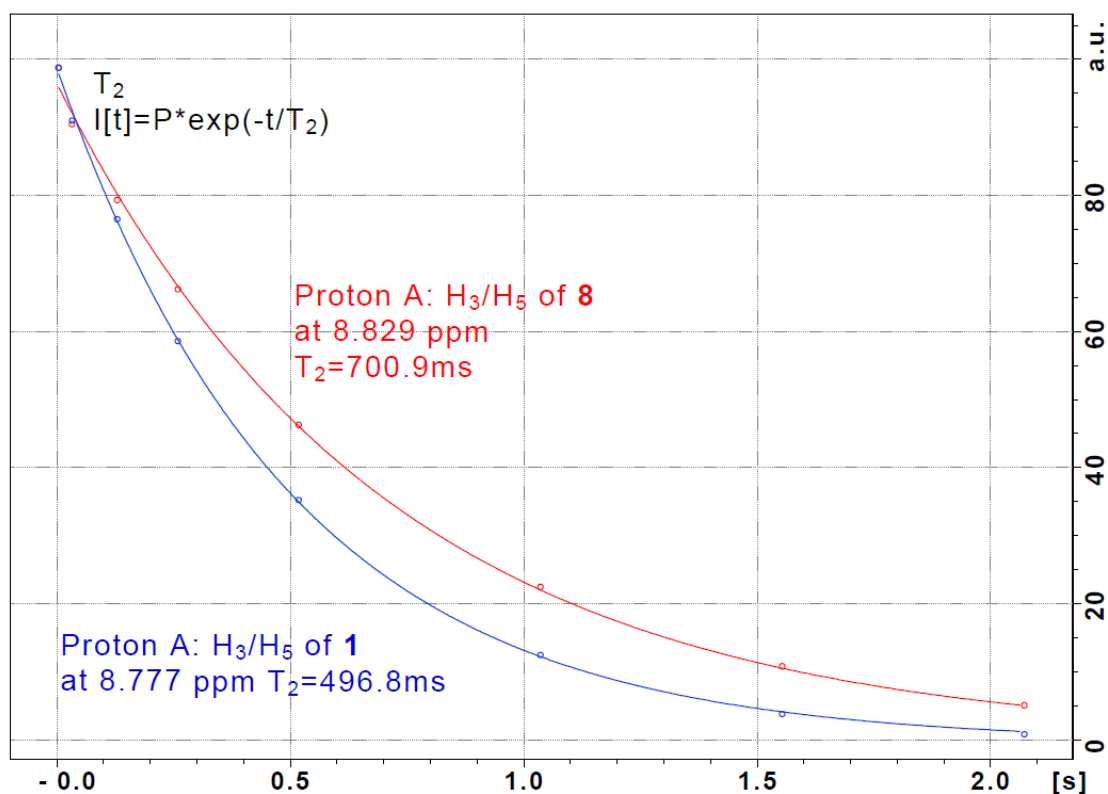

**Figure S115:** Representative plot of the spin-spin relaxation time  $T_2$  of Protons A:  $H_3/H_5$  for compound **8** (red) and **1** (blue). The spectrum illustrates the faster relaxation of the more rigid complex **1**.

**Table SI4:** Proton  $T_2$  relaxation times for compound **8** and compound **1**

| Proton       | $T_2$ [s] in <b>8</b> | $T_2$ [s] in <b>1</b> |
|--------------|-----------------------|-----------------------|
| A: $H_3/H_5$ | 0.700(10)             | 0.496(10)             |
| A: $H_4$     | 0.884(10)             | 0.506(10)             |
| B: $H_3$     | 0.877(10)             | 0.729(10)             |
| B: $H_5$     | 1.138(10)             | 0.721(10)             |
| B: $H_6$     | 1.128(10)             | 0.752(10)             |
| C: $H_3/H_5$ | 1.319(10)             | 0.658(10)             |
| C: $H_4$     | 1.026(10)             | 0.629(10)             |
| D: $H_2$     | n/a                   | 0.509(10)             |
| D: $H_4/H_6$ | n/a                   | 0.691(10)             |
| D: $H_5$     | n/a                   | 0.687(10)             |
| CHO          | 2.126(10)             | n/a                   |
| C: Olefin H  | n/a                   | 0.614(10)             |
| D: Olefin H  | n/a                   | 0.645(10)             |

To our delight, the analysis revealed highly significant differences between the central terpyridine units in **1** (0.496 to 0.752 s) and **8** (0.700 to 1.128 s, Table SI4) where for every single proton the  $T_2$  time of **1** is decreased by a factor of 1.20 to 1.75 with respect to **8**, indicating a drastic rigidification. The data even allow to localize the most mobile regions of the molecules: While the protons on the central pyridine ring **A** are the most static part, the *ortho*-positioned **B** rings are considerably more mobile in both compounds. While the mobility of the

strained linkage of the **C** and **D** rings is intermediate in **1**, the **C** ring and the aldehyde protons in **8** show an up to three-fold  $T_2$  increase, as can be expected due to the higher degree of rotational freedom. Overall the  $T_2$  times of **1** are much more uniform throughout the molecule (max/min: 1.52), whereas the spread is 3.04 in **8**.

The molecular weight increase of 20.9% between **1** and **8** is too small to explain the observed differences in  $T_2$  times, but aggregation of **1** to oligomeric assemblies would lead to effects in the observed order of magnitude. Therefore, also the hydrodynamic radii of both compounds in acetonitrile by diffusion ordered NMR spectroscopy were determined and a difference in diffusion coefficients of 5.2% corresponding to a mass increase for solvated **1** of 16.4% with respect to **8**, thus corroborating the proposed rigidification by the four-fold interlinkage was found.

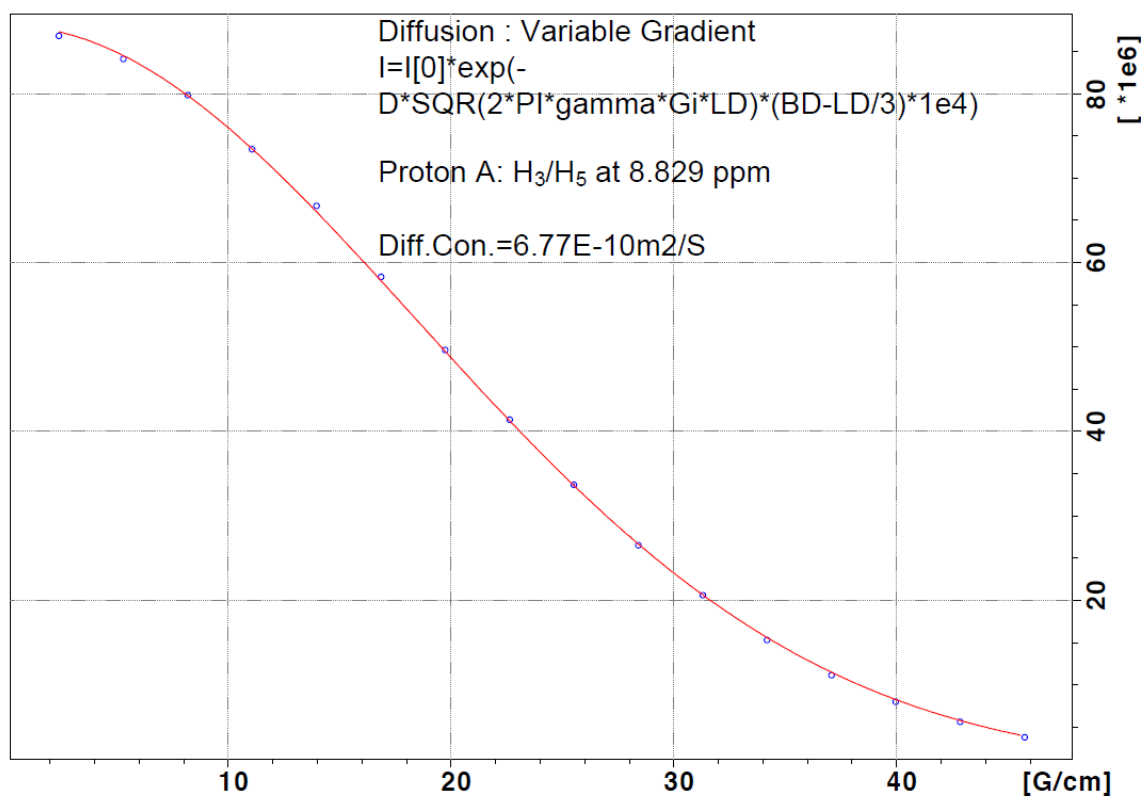

**Figure S116:** Diffusion ordered NMR spectroscopy of compound **8**: Experimental intensity (blue circles) and 2-parameter fit (red line).



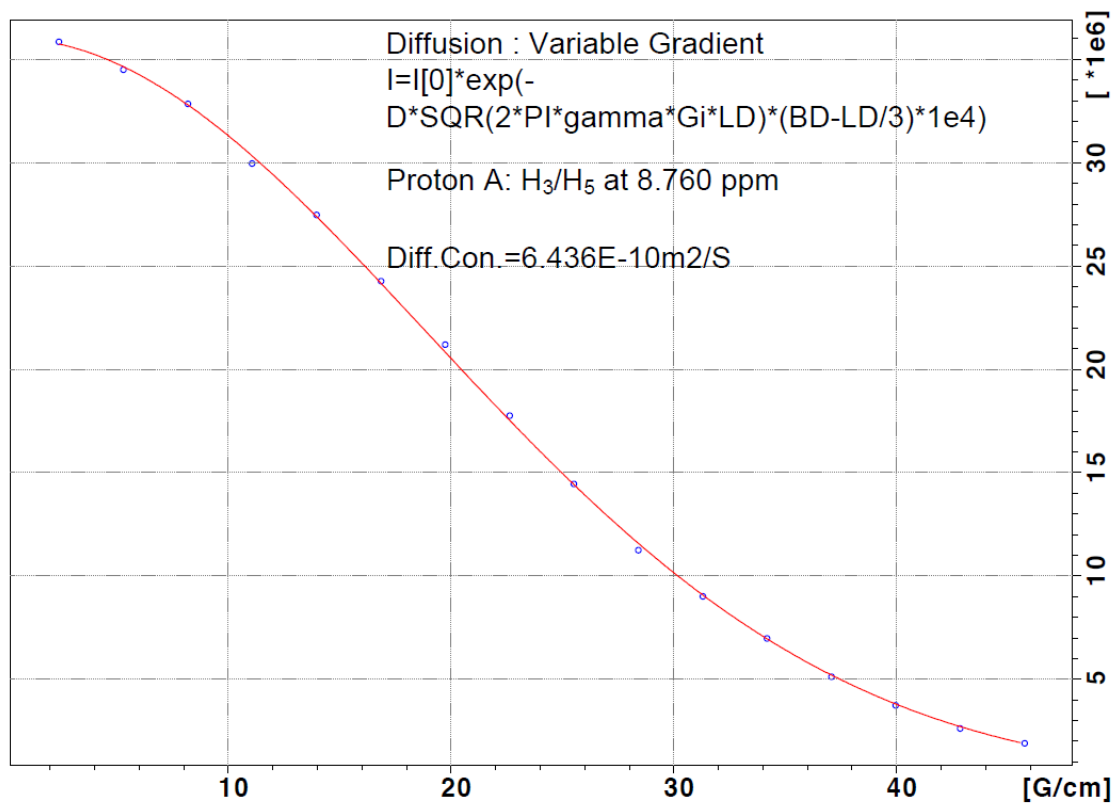

**Figure S117:** Diffusion ordered NMR spectroscopy of compound 1: Experimental intensity (blue circles) and 2-parameter fit (red line).

## Monitoring the Imine Condensation towards the Fourfold Interlinked Complex **2** by DI-ESI-MS and NMR Spectroscopy

The course of the eightfold imine condensation forming the fourfold interlinked complex **2** was monitored by direct injection electrospray mass spectrometry (DI-ESI-MS). Representative spectra recorded of the crude reaction mixture are displayed in figure S118 and figure S119. In figure S118 the course of the reaction after several minutes is depicted. The masses of the starting material and different intermediates, namely singly interlinked, twofold interlinked, threefold interlinked and the fourfold interlinked target structure **2** can be identified. Moreover, even an unwanted eightfold imine condensation product comprising five diamine subunits (three closed bridges and two additional bridging units masking both remaining aldehydes) can be observed.

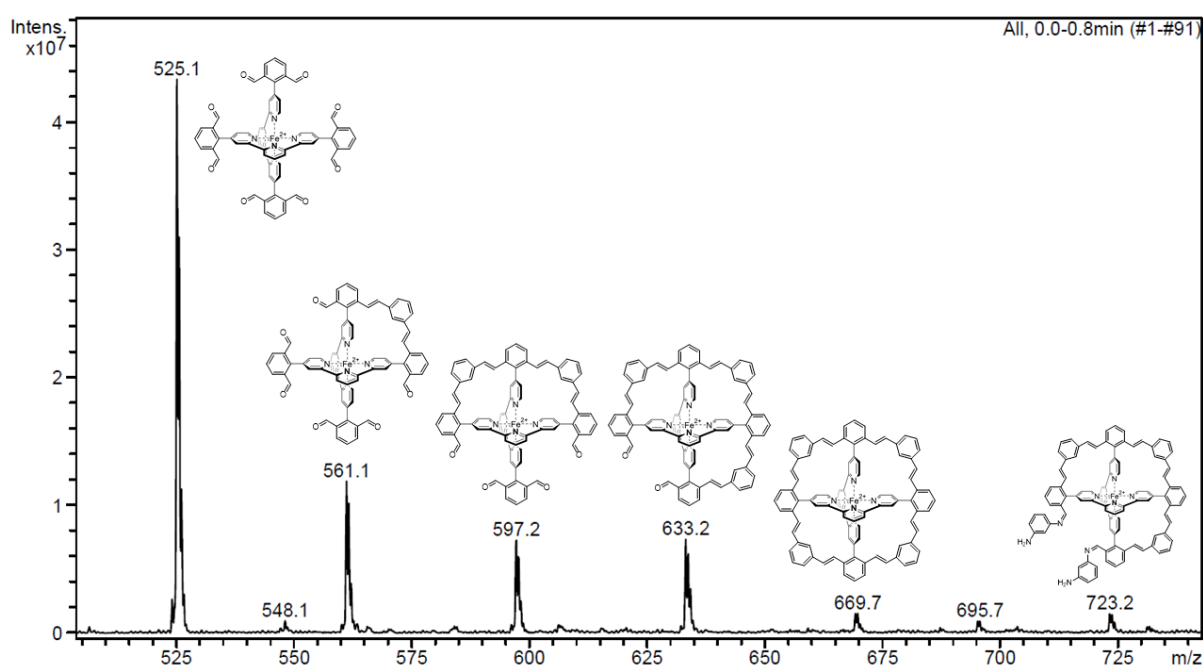

**Figure S118:** DI-ESI-MS displaying the composition of the condensation reaction. The structures matching the corresponding mass peaks are displayed.

As described in the main text, performing the condensation reaction with an eightfold excess of *meta*-phenylenediamine in refluxing 1,2-dichloroethane (83.5 °C) for 10 days resulted in the DI-ESI-mass spectrum displayed in Figure S119, with the mass of 670 m/z corresponding to the desired fourfold interlinked octamine complex **2** as major peak. However, some of the signals like e.g. the threefold interlinked intermediate (633 m/z) or the overreacted side-product (723 m/z) are less pronounced, but still present.

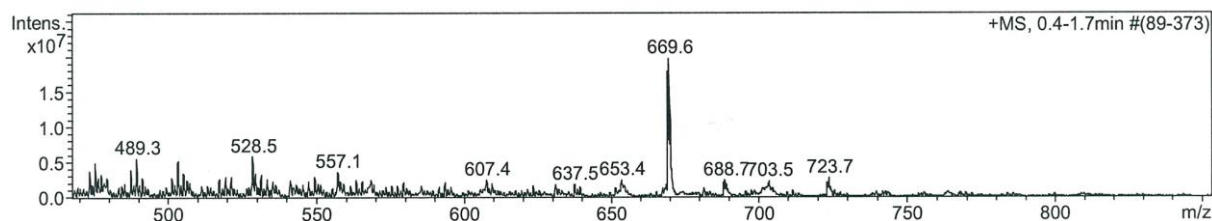

**Figure S119:** DI-ESI-MS spectrum of the imine condensation applying the improved reaction conditions favoring the formation of **2** (8 equivalents of the diamine in refluxing 1,2-dichloroethane (83.5 °C) for 10 days).

After 10 days, when the DI-ESI-MS displayed in Figure SI19 with the mass at 670 m/z assigned to the target complex **2** as dominant signal was recorded, the reaction was allowed to cool down. All attempts to isolate the pure imine interlinked complex failed. However, the crude reaction mixture enabled to record a high resolution mass spectrum of the complex **2**.

The analysis of the crude reaction mixture by  $^1\text{H-NMR}$  spectroscopy in acetone- $\text{d}_6$  is displayed in Figure SI20. The signal at 9.87 ppm indicates the presence of benzaldehyde type structures in the reaction mixture, pointing either at partial incomplete closing of the cage or a reopening of the labile imine bonds. Attempts to increase the concentration of the caged target structure **2** failed. The decomposition of the complex during the purification attempts pointed at too labile imine bonds and triggered the here reported interlinking by *Wittig*-chemistry.

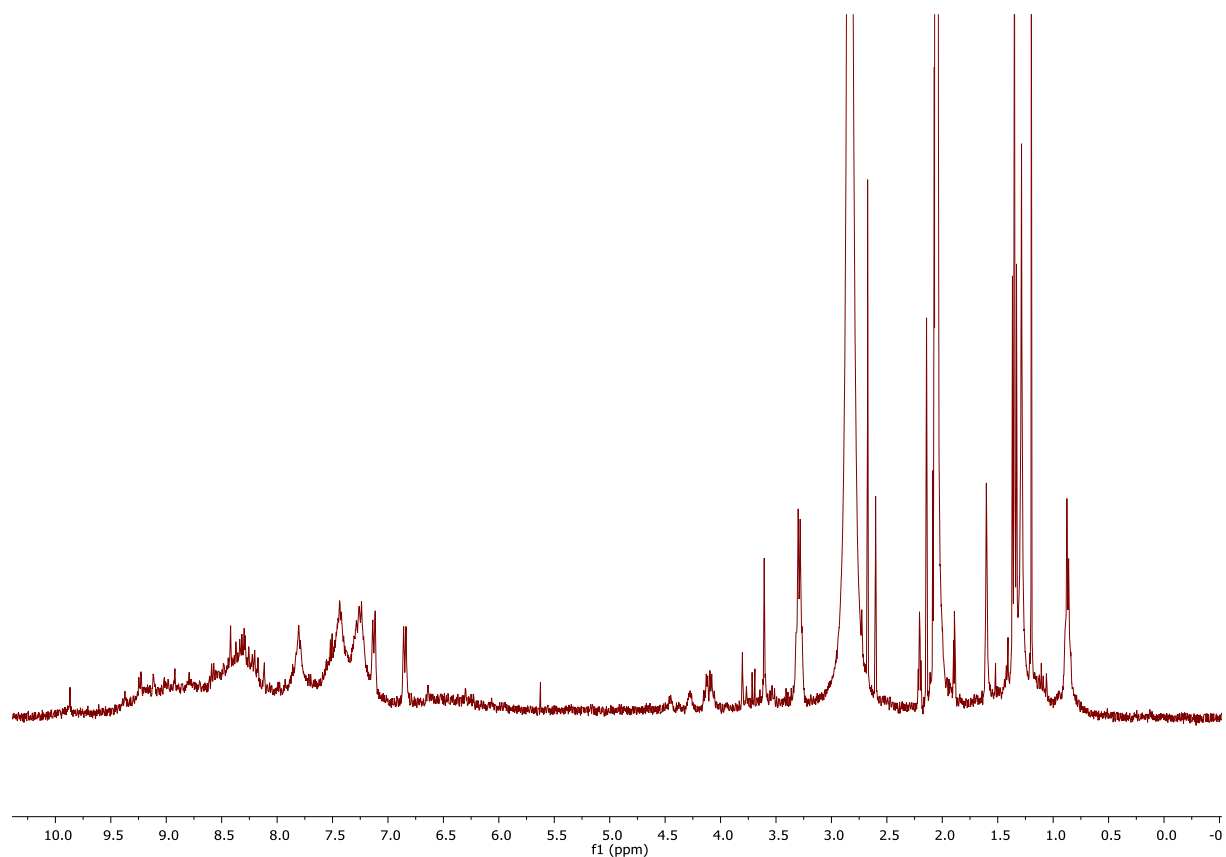

**Figure SI20:**  $^1\text{H-NMR}$  spectrum of the crude reaction mixture of the imine condensation recorded in acetone- $\text{d}_6$ .

## Scanning Tunneling Microscope (STM) Experiments of Complex 1

Clean and flat Au(111) surfaces were obtained by repeated cycles of Ar-ion sputtering and subsequent annealing to 500 °C.

The deposition of **1** was performed with a home-built electrospray setup<sup>6</sup> using a solution consisting of **1** dissolved in acetonitrile. The mass spectrum of the solution, acquired prior to deposition, exhibits a single peak with a mass to charge ratio at approximately 660 u/e, which is compatible with the expected mass to charge ratio of 665.7087 u/e within the accuracy of the mass spectrometer used.

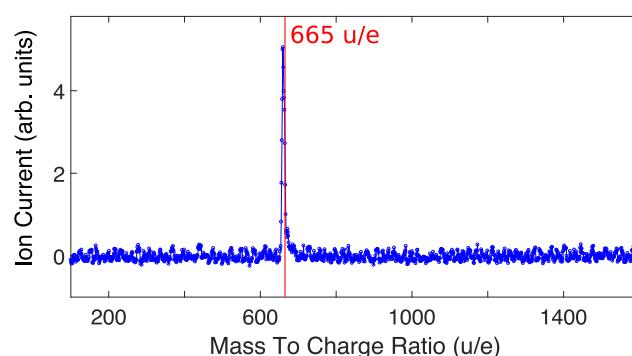

**Figure SI21:** Mass spectrum of **1** dissolved in acetonitrile prior to deposition.

The measurements were performed with a scanning tunneling microscope operated at low temperature (4.4 K) in ultra-high vacuum. STM tips were electrochemically etched from tungsten wire and further prepared in situ by indentation in the Au(111) substrate.

## Fe(II)tpy<sub>2</sub> Model Complexes of Varying Rigidity in STM Experiments

The interdependence of the coordination sphere geometry and the spin-state of the central Fe(II) ion makes Fe(II)tpy<sub>2</sub> complexes interesting model compounds for manipulating the molecular spin-state in STM experiments. To illustrate the unique stability of the coordination sphere of **1** on Au(111) in low-temperature STM experiments, its behavior is compared to less rigid Fe(II)tpy<sub>2</sub> model complexes that were previously analyzed in similar experiments.

Figure SI22 shows the structures together with STM measurements of three Fe(II)tpy<sub>2</sub> model complexes with increasing numbers of linkers between the terpyridine ligands. As previously discussed in Ref. [7], the compound without any linkers between both tpy-subunits (Figure SI22 a) was found fragmented on Au(111). A majority of fragments assembles into irregular clusters with varying numbers of ligands and Fe atoms. Occasionally, flat dimers are observed (Figure SI22 d). The apparent height of the ligands is approximately 200 pm. We

<sup>6</sup>Chr. Hamann, R. Woltmann, I.-Po Hong, N. Hauptmann, S. Karan, R. Berndt, *Rev. Sci. Instrum.* **2011**, *82*, 033903.

<sup>7</sup>T. Knaak, C. González, Y. J. Dappe, G. D. Harzmann, T. Brandl, M. Mayor, R. Berndt, M. Gruber, *J. Phys. Chem. C* **2019**, *123*, 4178–4185.

note that apparent height is related to the overlap of wave functions and may therefore differ from the geometric height.

Fragmentation on the surface is prevented by incorporating two linkers between the two tpy-ligands (Figure SI22 b). However, as displayed in Figure SI22 e, the complex is planarized on the surface because of the strong dispersion forces exerted by the metal substrate. The planarization is evident from the unchanged apparent height of the compound on Au(111) relative to that of the bare ligand.

A drastically different result is observed for the fourfold interlinked Fe(II)tpy<sub>2</sub> complex **1** (Figures SI22 c and f), where the apparent height is approximately 3 times larger than that of bare ligands. The large height indicates that the structure of **1** remains three-dimensional with limited surface-induced planarization.

In summary, the comparison of the STM results on the three Fe(II)tpy<sub>2</sub> model complexes of increasing rigidity suggest that **1** (4 linkers) is least sensitive to dispersion force induced distortion. This corroborates the molecular design hypothesis of **1** being the most rigid compound.

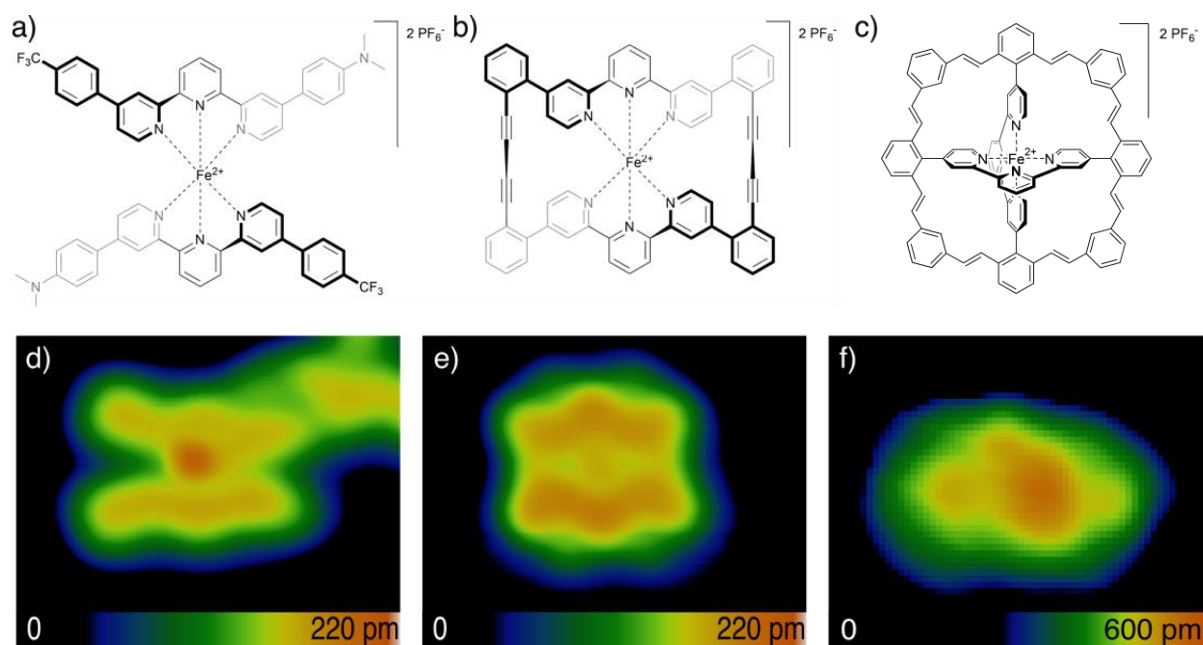

**Figure SI22:** a–c) Model of complexes with 0, 2 and 4 linkers. d–f) STM topographs (4 nm wide) of the complexes a–c) adsorbed on Au(111). Note the different height scale in (f). Details of the sample preparation and measurements of d) and e) are given in Ref. [7]. Tunneling conditions: d)  $I = 30$  pA,  $V = 50$  mV, e)  $I = 200$  pA,  $V = 100$  mV and f)  $I = 5$  pA,  $V = -500$  mV.

## HPLC Chromatograms of Complex 1

In a first HPLC run (for further details see experimental procedures) the threefold interlinked intermediate and the condensation product with more than four diamines per complex were separated from the product. The all-*trans* isomer was isolated from other isomers by two different applied reversed-phase (C18) HPLC conditions (see figure SI22). Both times a 7:3 mixture of MeCN:H<sub>2</sub>O, but once with 10 mM NH<sub>4</sub>PF<sub>6</sub> in both solvents and once with 10 mM NH<sub>4</sub>PF<sub>6</sub> in water and 0.1% TFA in MeCN. The chromatograms are given at 360 nm and 371 nm, respectively. In both cases the almost perfectly baseline separation of the all-*trans* isomer could be achieved. In the chromatogram a shoulder for both marked peaks can be seen on the right side. Therefore, only the blue marked part was isolated to prevent the impure isolation of the isomer. However, this and the fact that several different isomers are formed (theoretically 64 different isomer) led to the rather low yield of 4%.

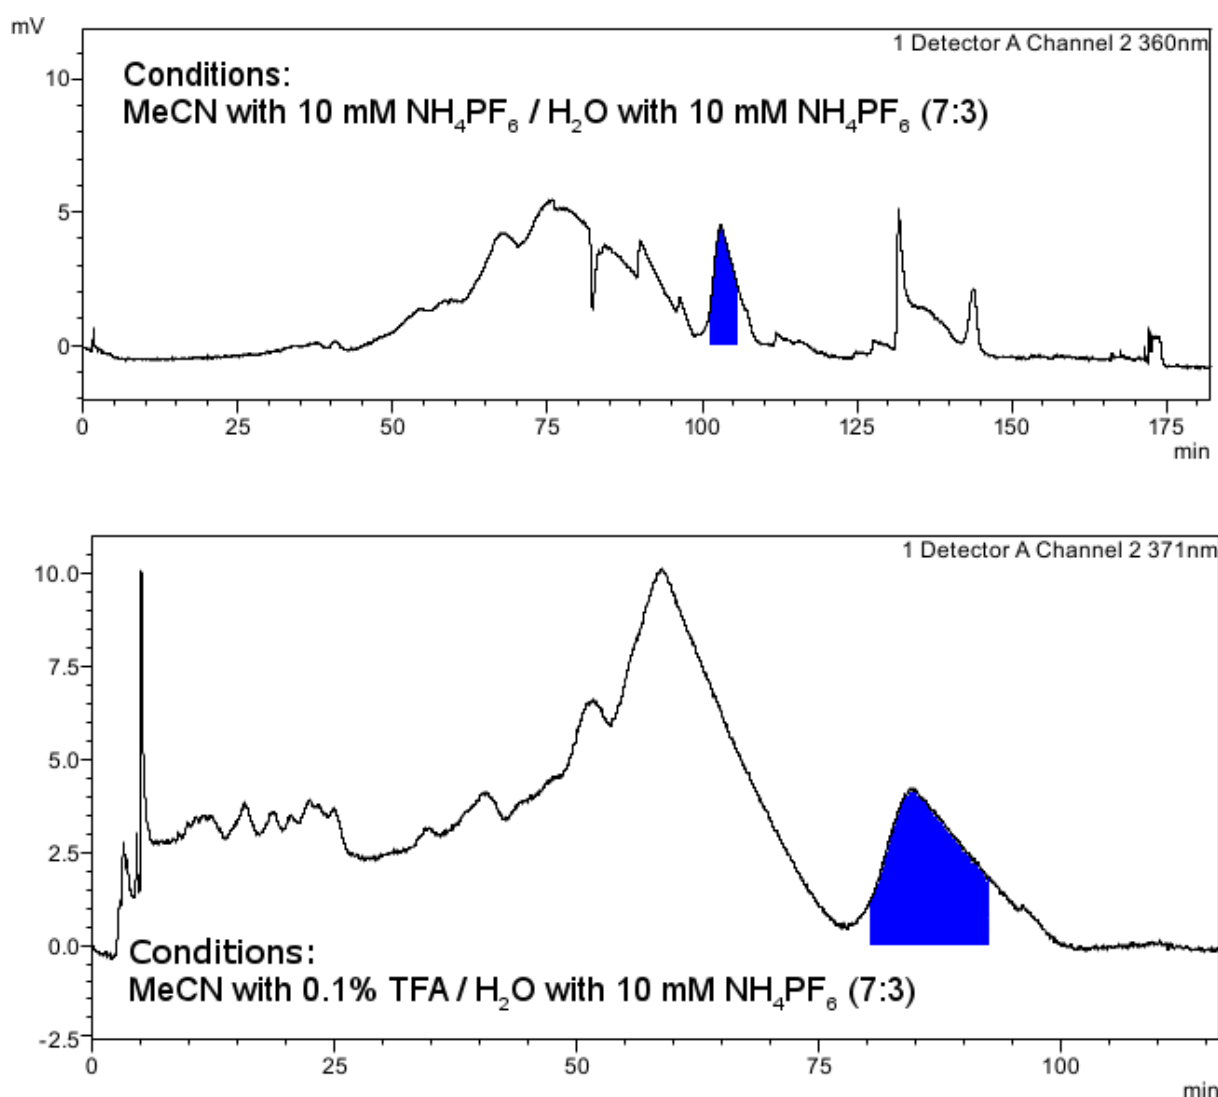

**Figure SI23:** HPLC Traces of complex 1 with different applied conditions. Both conditions yielded the isolation of the all-*trans* isomer corresponding to the peak marked in blue.

## DFT Calculations

An isodesmic reaction, where the type of chemical bonds broken in the reactant are the same as the type of bonds formed in the reaction product, can be used as a theoretical tool to evaluate the strain in a molecule. In the case of **1** it is important to partitioning the molecule carefully to satisfy this requirement. It was achieved by introducing 4 4-phenylpyridine units that then combine with **1** to create a ring system without any possible crowding alongside a bis-[Fe(diphenyl-2,2':6',2''-terpyridine)]<sup>2+</sup> complex. DFT calculated *Heat of Formation* values were used to estimate the energy increase caused by steric crowding in **1**. It was found that the ring strain energy compares to that of a cyclononane or cyclodecane, which, considering the large ring system of **1**, can be considered as negligible (Figure S124).

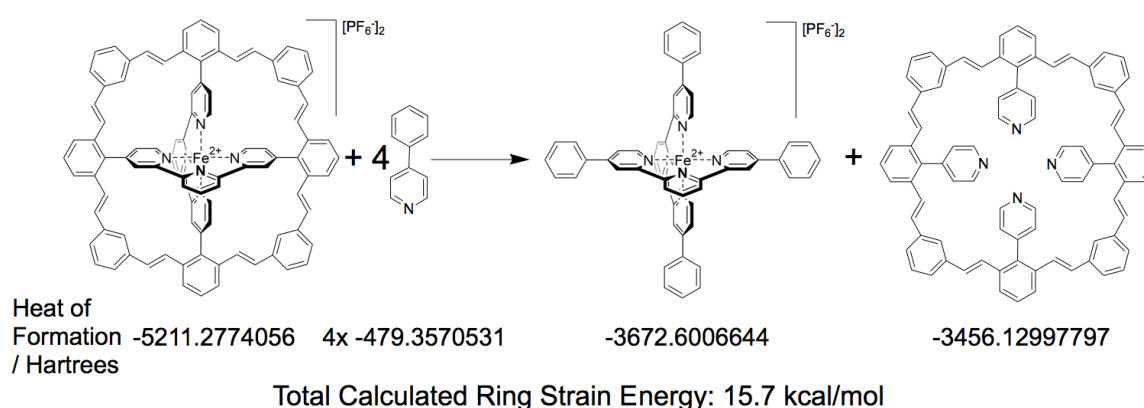

**Figure S124:** The strain of complex **1** was estimated by investigating the depicted isodesmic reaction. DFT calculations (B3LYP/6-31G (d,p)) were used to access the heat of formation of the 4 species involved in this reaction.
